# Supplementary material for: Genome-Wide Analysis of PAPS1-Dependent Polyadenylation Identifies Novel Roles for Functionally Specialized Poly(A) Polymerases in Arabidopsis thaliana
Source: PLoS Genet. 2015 Aug 25;11(8):e1005474. doi: 10.1371/journal.pgen.1005474 (PMC4549238; doi:10.1371/journal.pgen.1005474)
Supplement: S3 Table — log2FC(paps1.l/s / Ler.l/s): log2 of the ratio of (long/short ratio in paps1) to (long/short ratio in Ler); negative values indicate shorter poly(A)-tail in paps1-1 mutants; log2CPM: log2-transformed counts per million (CPM) transcript abundance estimates; BH p-value: Benjamini-Hochberg corrected p-value; genes highlighted in yellow are tested in S3C Fig. (XLSX) [file pgen.1005474.s010.xlsx]

## Sheet: S3 Table
S3 Table: Estimated changes in poly(A)-tail length in paps1-1 mutants versus wild type.
log2FC(paps1.l/s / Ler.l/s): log2 of the ratio of (long/short ratio in paps1) to (long/short ratio in Ler); negative values indicate shorter poly(A)-tail in paps1-1 mutants
log2CPM: log2-transformed counts per million (CPM) transcript abundance estimates
BH p-value: Benjamini-Hochberg corrected p-value
genes highlighted in yellow are tested in S3C Fig.
Gene ID	log2FC(paps1.l/s / Ler.l/s)	log2CPM	p-value	BH p-value	Short description
AT5G05200	2.69454	6.25348	2.14447e-34	3.62673e-30	Protein kinase superfamily protein
AT1G06670	2.19379	5.37701	9.18956e-31	7.77069e-27	nuclear DEIH-boxhelicase
AT3G44970	-1.09288	4.89281	1.96476e-08	0.00011076	Cytochrome P450 superfamily protein
AT5G11740	-1.20634	7.81615	5.32253e-08	0.000225037	arabinogalactan protein 15
AT4G35490	-0.923264	4.40052	1.05429e-06	0.00356605	mitochondrial ribosomal protein L11
AT1G48410	0.896218	6.19528	3.03892e-06	0.00541348	Stabilizer of iron transporter SufD / Polynucleotidyl transferase
AT1G72930	-1.01433	5.51496	2.12257e-06	0.00541348	toll/interleukin-1 receptor-like
AT4G32850	-0.820954	6.96167	2.74978e-06	0.00541348	nuclear poly(a) polymerase
AT5G05750	-1.3743	2.50741	2.54927e-06	0.00541348	DNAJ heat shock N-terminal domain-containing protein
AT5G20220	-1.08729	3.47217	3.20097e-06	0.00541348	zinc knuckle (CCHC-type) family protein
AT2G16586	1.05362	9.02923	4.23461e-06	0.00651052
AT1G20430	-1.2186	2.40219	4.95008e-06	0.00697632
AT1G57770	0.809225	6.28486	5.3719e-06	0.00698842	FAD/NAD(P)-binding oxidoreductase family protein
AT2G41475	-0.731302	4.79438	6.36682e-06	0.00769112	Embryo-specific protein 3, (ATS3)
AT1G33120	-0.850275	5.76659	7.52037e-06	0.00816966	Ribosomal protein L6 family
AT3G56800	-0.768205	6.4274	7.7291e-06	0.00816966	calmodulin 3
AT1G27410	1.44484	2.08767	8.75192e-06	0.00822292	DNA repair metallo-beta-lactamase family protein
AT5G18380	-0.809656	7.34038	8.42157e-06	0.00822292	Ribosomal protein S5 domain 2-like superfamily protein
AT5G48490	-1.36484	4.83863	1.01271e-05	0.0090142	Bifunctional inhibitor/lipid-transfer protein/seed storage 2S albumin superfamily protein
AT3G53990	-0.910948	7.08089	1.42699e-05	0.0120666	Adenine nucleotide alpha hydrolases-like superfamily protein
AT1G15920	-0.865666	4.16702	1.69489e-05	0.0126812	Polynucleotidyl transferase, ribonuclease H-like superfamily protein
AT1G48440	-0.715842	4.71513	1.726e-05	0.0126812	B-cell receptor-associated 31-like
AT1G55152	-1.03947	3.2472	1.60929e-05	0.0126812
AT2G41060	1.0297	3.99365	1.7996e-05	0.0126812	RNA-binding (RRM/RBD/RNP motifs) family protein
AT1G36180	-1.02114	3.34841	1.94145e-05	0.0131335	acetyl-CoA carboxylase 2
AT1G23130	1.09166	7.72202	2.21591e-05	0.013855	Polyketide cyclase/dehydrase and lipid transport superfamily protein
AT2G45910	0.88298	4.72773	2.27203e-05	0.013855	U-box domain-containing protein kinase family protein
AT5G42650	-0.676512	6.1351	2.29388e-05	0.013855	allene oxide synthase
AT5G23770	1.40354	2.33431	2.58378e-05	0.0150679	DOMAIN OF UNKNOWN FUNCTION 724 8
AT5G42060	-1.07633	2.53976	2.91792e-05	0.0164493	DEK, chromatin associated protein
AT1G52720	-1.16439	2.42302	3.41082e-05	0.0180262
AT1G78450	-1.33541	2.514	3.37671e-05	0.0180262	SOUL heme-binding family protein
AT3G09390	-0.96884	7.88904	3.67843e-05	0.0188514	metallothionein 2A
AT4G31985	-0.776502	6.19646	3.88501e-05	0.0193245	Ribosomal protein L39 family protein
AT1G22885	-1.23211	2.24107	4.34223e-05	0.0193252
AT1G51400	-1.15253	4.19922	4.03645e-05	0.0193252	Photosystem II 5 kD protein
AT2G46600	-1.01747	4.44836	4.24521e-05	0.0193252	Calcium-binding EF-hand family protein
AT3G53430	-0.831715	6.70856	4.33813e-05	0.0193252	Ribosomal protein L11 family protein
AT2G19740	-0.768926	5.29424	4.8564e-05	0.0202965	Ribosomal protein L31e family protein
AT2G29995	-0.990566	2.90235	4.99254e-05	0.0202965
AT5G26290	-1.00767	4.05345	4.70995e-05	0.0202965	TRAF-like family protein
AT5G58070	-0.846911	7.74155	5.04053e-05	0.0202965	temperature-induced lipocalin
AT5G22410	1.75326	1.44479	5.57367e-05	0.0219214	root hair specific 18
AT5G55290	-0.742255	4.77594	6.24852e-05	0.024017	ATPase, V0 complex, subunit E
AT1G56045	-0.790486	6.3754	7.09602e-05	0.0266684	Ribosomal protein L41 family
AT1G02290	1.18338	2.57	7.96091e-05	0.026927
AT1G62310	1.05011	3.41762	7.75463e-05	0.026927	transcription factor jumonji (jmjC) domain-containing protein
AT2G30040	-1.03166	3.30351	7.72815e-05	0.026927	mitogen-activated protein kinase kinase kinase 14
AT2G44310	-0.667859	4.36539	7.40358e-05	0.026927	Calcium-binding EF-hand family protein
AT3G60630	-0.709907	4.32477	7.9141e-05	0.026927	GRAS family transcription factor
AT1G49490	-0.695971	4.64058	8.24938e-05	0.0273556	Leucine-rich repeat (LRR) family protein
AT1G50732	-1.06625	3.69837	9.43512e-05	0.0287757
AT2G43530	-0.723475	4.31349	8.95557e-05	0.0287757	Scorpion toxin-like knottin superfamily protein
AT4G19070	1.08949	3.48118	9.52836e-05	0.0287757	Putative membrane lipoprotein
AT5G47550	-1.34402	2.3954	9.26686e-05	0.0287757	Cystatin/monellin superfamily protein
AT5G56100	-1.27169	4.35523	9.09509e-05	0.0287757	glycine-rich protein / oleosin
AT5G25610	-0.895123	8.22907	9.96767e-05	0.0295743	BURP domain-containing protein
AT5G60030	-0.79437	5.04463	0.000108627	0.0316741
AT1G22270	-0.928746	3.43046	0.000115656	0.0320651	Trm112p-like protein
AT3G05490	-0.836048	4.56416	0.00011435	0.0320651	ralf-like 22
AT5G56140	-0.833574	5.36213	0.000115364	0.0320651	RNA-binding KH domain-containing protein
AT1G69830	0.698265	7.6044	0.00012041	0.0323233	alpha-amylase-like 3
AT3G23590	-0.860142	4.22914	0.000119276	0.0323233	REF4-related 1
AT3G01740	-0.724191	4.43656	0.000124764	0.0326136	Mitochondrial ribosomal protein L37
AT3G18740	-0.70848	6.05964	0.000127276	0.0326136	Ribosomal protein L7Ae/L30e/S12e/Gadd45 family protein
AT3G49910	-0.766279	7.15326	0.000126469	0.0326136	Translation protein SH3-like family protein
AT4G15800	-0.735002	5.02944	0.000131218	0.0326346	ralf-like 33
AT5G67600	-0.842254	3.72518	0.000130681	0.0326346
AT2G18560	-0.847274	3.99889	0.000137514	0.0330804	UDP-Glycosyltransferase superfamily protein
AT2G42270	-0.835183	4.49315	0.000138878	0.0330804	U5 small nuclear ribonucleoprotein helicase
AT3G07470	-0.59359	5.7384	0.000136395	0.0330804	Protein of unknown function, DUF538
AT2G23120	-1.00732	6.5376	0.000146664	0.0344497	Late embryogenesis abundant protein, group 6
AT2G42200	-1.27728	2.06394	0.000153661	0.0353606	squamosa promoter binding protein-like 9
AT3G11120	-0.848316	6.16825	0.000154723	0.0353606	Ribosomal protein L41 family
AT1G50055	-1.46639	1.77906	0.000178468	0.0386801	TAS1B; other RNA
AT2G34585	-0.763922	3.81627	0.000174211	0.0386801
AT3G23880	-0.822204	3.31192	0.000175503	0.0386801	F-box and associated interaction domains-containing protein
AT4G09490	-1.20207	1.77791	0.000178181	0.0386801	Polynucleotidyl transferase, ribonuclease H-like superfamily protein
AT4G28290	-0.750298	3.86565	0.000180684	0.0386801
AT1G14450	-0.686437	5.02758	0.000193135	0.0408287	NADH dehydrogenase (ubiquinone)s
AT2G27775	-0.898648	3.153	0.000197366	0.040961
AT3G15580	-0.748236	3.94701	0.000198605	0.040961	Ubiquitin-like superfamily protein
AT5G64140	-0.86415	6.35069	0.000201221	0.0410005	ribosomal protein S28
AT1G01470	-0.691891	4.41332	0.000220188	0.0426665	Late embryogenesis abundant protein
AT1G54040	0.838119	10.2044	0.000218779	0.0426665	epithiospecifier protein
AT1G55805	-0.887857	3.32328	0.000214588	0.0426665	BolA-like family protein
AT2G45070	-0.737736	6.17967	0.000222011	0.0426665	Preprotein translocase Sec, Sec61-beta subunit protein
AT3G23170	-0.915925	4.16151	0.000217486	0.0426665
AT5G26260	-0.775652	6.34554	0.000232801	0.0442374	TRAF-like family protein
AT1G50010	-0.625231	7.49155	0.000253783	0.0461502	tubulin alpha-2 chain
AT3G44010	-0.634387	6.07096	0.000250479	0.0461502	Ribosomal protein S14p/S29e family protein
AT3G52500	-0.617477	6.78966	0.000253317	0.0461502	Eukaryotic aspartyl protease family protein
AT4G33410	-0.693055	4.69856	0.000252415	0.0461502	SIGNAL PEPTIDE PEPTIDASE-LIKE 1
AT1G06270	1.21768	2.0856	0.000257026	0.0462428	Pentatricopeptide repeat (PPR) superfamily protein
AT2G41200	0.97095	2.02184	0.000263261	0.0464522
AT5G56170	-0.628993	6.19857	0.000263683	0.0464522	LORELEI-LIKE-GPI-ANCHORED PROTEIN 1
AT5G52100	-0.669495	4.72693	0.000277663	0.0484107	Dihydrodipicolinate reductase, bacterial/plant
AT1G34418	-0.664554	3.99818	0.000297896	0.0506184	other RNA
AT2G33540	-0.731473	4.4217	0.000295752	0.0506184	C-terminal domain phosphatase-like 3
AT5G41685	-0.719685	3.81279	0.000299305	0.0506184	Mitochondrial outer membrane translocase complex, subunit Tom7
AT5G15270	0.715301	4.10889	0.00033172	0.055545	RNA-binding KH domain-containing protein
AT3G11600	-0.792535	3.75676	0.000338403	0.0561085
AT1G49310	-0.994674	2.2818	0.000343738	0.0561242
AT5G64360	0.899898	3.45992	0.000345134	0.0561242	Chaperone DnaJ-domain superfamily protein
AT1G53030	-0.870786	2.54194	0.000352214	0.0567299	Cytochrome C oxidase copper chaperone (COX17)
AT3G47070	-0.953196	9.20671	0.000358803	0.0572461
AT1G20330	-0.532169	6.27156	0.000364126	0.0575524	sterol methyltransferase 2
AT5G67300	-0.830479	6.66391	0.000372263	0.0582937	myb domain protein r1
AT5G38150	0.742305	5.98707	0.000387922	0.0601884	Plant protein of unknown function (DUF827)
AT5G57785	-0.911397	4.12044	0.000391749	0.0602297
AT1G10682	-0.743094	6.09328	0.000399763	0.0603643	other RNA
AT5G65060	-0.907912	2.74132	0.000396726	0.0603643	K-box region and MADS-box transcription factor family protein
AT2G38480	-0.736224	3.6436	0.000406334	0.0608135	Uncharacterised protein family (UPF0497)
AT1G05120	0.803317	3.32006	0.00043109	0.0639526	Helicase protein with RING/U-box domain
AT1G32120	-0.827708	3.24288	0.000445327	0.0654902
AT5G22390	-1.04388	2.73269	0.000472573	0.0688978	Protein of unknown function (DUF3049)
AT4G25500	-0.907333	5.25234	0.000478642	0.0691863	arginine/serine-rich splicing factor 35
AT1G20070	-0.932568	6.00927	0.000508846	0.0704404
AT1G20450	-1.1846	7.05929	0.00049826	0.0704404	Dehydrin family protein
AT1G28060	-0.529567	5.92504	0.000518139	0.0704404	Pre-mRNA-splicing factor 3
AT2G17970	-0.917842	2.27219	0.000506952	0.0704404	2-oxoglutarate (2OG) and Fe(II)-dependent oxygenase superfamily protein
AT3G26980	-1.29545	2.73085	0.000507789	0.0704404	membrane-anchored ubiquitin-fold protein 4 precursor
AT5G16470	-0.623088	6.79793	0.000519535	0.0704404	zinc finger (C2H2 type) family protein
AT5G18290	-0.851671	2.76133	0.000520639	0.0704404	Aquaporin-like superfamily protein
AT5G24460	-0.63758	5.64201	0.000498478	0.0704404
AT2G25610	-0.662669	4.67819	0.000524963	0.0704617	ATPase, F0/V0 complex, subunit C protein
AT2G43535	-0.61643	5.48656	0.000534865	0.0712255	Scorpion toxin-like knottin superfamily protein
AT3G36659	-1.17136	1.48194	0.000553269	0.072534	Plant invertase/pectin methylesterase inhibitor superfamily protein
AT4G17870	-0.586347	6.30436	0.000551572	0.072534	Polyketide cyclase/dehydrase and lipid transport superfamily protein
AT4G30960	-0.589882	7.15247	0.000558992	0.0727205	SOS3-interacting protein 3
AT2G42310	-0.628347	4.98659	0.000589743	0.0755586
AT5G17190	-0.731933	4.13172	0.00058831	0.0755586
AT4G25360	0.91681	3.34814	0.000603515	0.0767417	TRICHOME BIREFRINGENCE-LIKE 18
AT4G15680	-1.03306	2.31098	0.000617433	0.0779256	Thioredoxin superfamily protein
AT2G01023	1.52651	1.61569	0.000627321	0.0780092
AT3G12370	-0.789175	4.02618	0.000625548	0.0780092	Ribosomal protein L10 family protein
AT1G12310	-0.704667	5.18319	0.000637885	0.0787439	Calcium-binding EF-hand family protein
AT1G52510	0.693298	6.00792	0.000648809	0.079512	alpha/beta-Hydrolases superfamily protein
AT4G12600	-0.691592	5.79308	0.000660279	0.0797617	Ribosomal protein L7Ae/L30e/S12e/Gadd45 family protein
AT5G17870	-0.688052	6.19954	0.000659692	0.0797617	plastid-specific 50S ribosomal protein 6
AT2G24580	-0.608409	4.94589	0.000666323	0.079921	FAD-dependent oxidoreductase family protein
AT4G31560	-0.700428	5.17973	0.000681447	0.0808675	high chlorophyll fluorescence 153
AT5G18600	-0.816866	4.99997	0.000683778	0.0808675	Thioredoxin superfamily protein
AT5G35210	0.655924	5.96042	0.000694996	0.0816234	metalloendopeptidases;zinc ion binding;DNA binding
AT3G01420	0.638029	6.94382	0.000699974	0.0816412	Peroxidase superfamily protein
AT5G13780	-0.536999	5.74397	0.000716675	0.0830165	Acyl-CoA N-acyltransferases (NAT) superfamily protein
AT1G03560	-0.648292	3.75869	0.000748622	0.083294	Pentatricopeptide repeat (PPR-like) superfamily protein
AT1G78820	-1.06323	4.41308	0.000744751	0.083294	D-mannose binding lectin protein with Apple-like carbohydrate-binding domain
AT2G34960	-0.865191	2.26518	0.000747645	0.083294	cationic amino acid transporter 5
AT3G01130	-0.655906	5.7487	0.000726817	0.083294
AT3G62250	-0.776571	7.73054	0.000742103	0.083294	ubiquitin 5
AT5G48485	-0.840107	4.29707	0.000739069	0.083294	Bifunctional inhibitor/lipid-transfer protein/seed storage 2S albumin superfamily protein
AT2G46735	-0.756115	4.40805	0.000777019	0.0858885
AT1G32310	-1.06003	1.6179	0.000800125	0.0878682
AT2G41990	-0.7776	3.0058	0.000834556	0.0894888
AT3G07460	-0.616717	6.18831	0.000829757	0.0894888	Protein of unknown function, DUF538
AT4G18100	-0.654465	7.37413	0.00083185	0.0894888	Ribosomal protein L32e
AT4G32620	-0.606691	5.31299	0.000836047	0.0894888	Enhancer of polycomb-like transcription factor protein
AT1G71692	-1.33156	1.47118	0.00086351	0.091273	AGAMOUS-like 12
AT2G31230	-0.889667	3.48099	0.000858559	0.091273	ethylene-responsive element binding factor 15
AT1G68890	0.666562	5.29696	0.000884675	0.0929293	magnesium ion binding;thiamin pyrophosphate binding;hydro-lyases;catalytics;2-succinyl-5-enolpyruvyl-6-hydroxy-3-cyclohexene-1-carboxylic-acid synthases
AT2G16710	-0.672169	3.93889	0.000912499	0.0940987	Iron-sulphur cluster biosynthesis family protein
AT2G47770	-1.23278	1.5719	0.000904012	0.0940987	TSPO(outer membrane tryptophan-rich sensory protein)-related
AT5G07960	-0.802524	2.99714	0.000908875	0.0940987
AT1G32080	0.677838	8.32147	0.000948735	0.0960779	membrane protein, putative
AT1G79940	-0.546486	5.94048	0.000946806	0.0960779	DnaJ / Sec63 Brl domains-containing protein
AT4G33640	-0.703328	3.82331	0.000946248	0.0960779
AT1G07770	-0.57614	6.92163	0.000969952	0.0965482	ribosomal protein S15A
AT1G15260	-0.913194	4.55618	0.000981924	0.0965482
AT5G22880	-0.803531	4.37011	0.000976983	0.0965482	histone B2
AT5G43700	-0.664615	5.02335	0.000981091	0.0965482	AUX/IAA transcriptional regulator family protein
AT5G65750	0.54218	4.59786	0.000965054	0.0965482	2-oxoglutarate dehydrogenase, E1 component
AT1G69410	-0.668316	5.75727	0.000995779	0.0967096	eukaryotic elongation factor 5A-3
AT4G19710	0.581497	5.30264	0.00100072	0.0967096	aspartate kinase-homoserine dehydrogenase ii
AT5G12110	-0.906237	5.65425	0.000995927	0.0967096	Glutathione S-transferase, C-terminal-like;Translation elongation factor EF1B/ribosomal protein S6
AT2G16510	-0.520058	5.88412	0.00101436	0.0969205	ATPase, F0/V0 complex, subunit C protein
AT4G26320	-1.0386	2.90763	0.00101288	0.0969205	arabinogalactan protein 13
AT1G13930	-0.690417	8.40876	0.00106546	0.100106
AT1G50320	-0.636994	7.37817	0.00105907	0.100106	thioredoxin X
AT4G26130	-0.518499	6.34269	0.00106197	0.100106
AT1G52618	-1.06745	2.19121	0.00107858	0.100779
AT2G14660	-0.960247	2.6459	0.00109965	0.101072
AT3G23490	-0.609053	5.69401	0.00109945	0.101072	cyanase
AT4G12670	0.622073	4.57403	0.00109729	0.101072	Homeodomain-like superfamily protein
AT1G22890	-1.33474	4.45062	0.00111897	0.101742
AT1G33590	-0.864469	6.47285	0.00111391	0.101742	Leucine-rich repeat (LRR) family protein
AT1G78040	-0.554249	8.40759	0.00113971	0.103074	Pollen Ole e 1 allergen and extensin family protein
AT5G53650	-0.821144	2.43503	0.00115641	0.104028
AT5G43260	-0.680067	4.56978	0.00116403	0.104159	chaperone protein dnaJ-related
AT1G43790	-0.856249	2.1073	0.00118291	0.104741	tracheary element differentiation-related 6
AT5G67360	-0.562693	6.63468	0.00117996	0.104741	Subtilase family protein
AT1G11475	-0.605923	4.56795	0.00122463	0.107869	RNA polymerases N / 8 kDa subunit
AT2G40280	-0.69661	3.79719	0.00128442	0.11255	S-adenosyl-L-methionine-dependent methyltransferases superfamily protein
AT1G15520	-1.30945	0.958547	0.0013451	0.116085	pleiotropic drug resistance 12
AT2G25850	-0.592724	4.88969	0.00134427	0.116085	poly(A) polymerase 2
AT3G62840	-0.559546	6.09218	0.00134535	0.116085	Small nuclear ribonucleoprotein family protein
AT1G09200	-0.904125	5.13604	0.00142996	0.121553	Histone superfamily protein
AT3G06700	-0.667407	7.20765	0.00142424	0.121553	Ribosomal L29e protein family
AT5G06060	-0.639511	4.12225	0.00143028	0.121553	NAD(P)-binding Rossmann-fold superfamily protein
AT1G53785	1.13348	2.37189	0.00147393	0.122898
AT2G30060	-0.494699	5.53176	0.00146047	0.122898	Pleckstrin homology (PH) domain superfamily protein
AT4G35783	-1.15699	1.79317	0.00147519	0.122898	ROTUNDIFOLIA like 6
AT5G56670	-0.579139	6.4077	0.00146199	0.122898	Ribosomal protein S30 family protein
AT1G76560	-0.750127	4.23345	0.00151841	0.123857	CP12 domain-containing protein 3
AT3G11770	-0.755933	3.01858	0.00153064	0.123857	Polynucleotidyl transferase, ribonuclease H-like superfamily protein
AT3G22230	-0.739826	6.30722	0.00152686	0.123857	Ribosomal L27e protein family
AT3G63140	0.644193	9.19997	0.00152286	0.123857	chloroplast stem-loop binding protein of 41 kDa
AT5G08060	-0.525758	6.13479	0.00151011	0.123857
AT5G08650	0.655754	7.67526	0.00152645	0.123857	Small GTP-binding protein
AT5G02120	-0.67826	7.13818	0.0015457	0.124481	one helix protein
AT2G02510	-0.539338	5.33727	0.00157995	0.126635	NADH dehydrogenase (ubiquinone)s
AT2G06520	-0.723061	10.7305	0.00162298	0.128863	photosystem II subunit X
AT2G41430	-0.90722	10.2071	0.00161592	0.128863	dehydration-induced protein (ERD15)
AT1G60270	-0.96024	2.04331	0.00163412	0.129141	beta glucosidase 6
AT1G75950	-0.522551	6.92291	0.00165515	0.129286	S phase kinase-associated protein 1
AT3G25717	-0.620299	4.70701	0.00165402	0.129286	ROTUNDIFOLIA like 16
AT5G22875	-0.653953	3.29602	0.00165889	0.129286
AT2G19310	-1.05356	6.19789	0.00172838	0.134084	HSP20-like chaperones superfamily protein
AT4G34480	-0.53051	5.57899	0.00177791	0.137297	O-Glycosyl hydrolases family 17 protein
AT1G15825	-0.838505	3.61583	0.00183163	0.138161	hydroxyproline-rich glycoprotein family protein
AT3G06750	-0.550697	7.42372	0.0018339	0.138161	hydroxyproline-rich glycoprotein family protein
AT3G23325	-1.27151	1.844	0.00186262	0.138161	Splicing factor 3B subunit 5/RDS3 complex subunit 10
AT4G12340	-0.548047	5.20455	0.00183623	0.138161	copper ion binding
AT5G14105	-0.843332	2.24598	0.00183957	0.138161
AT5G48810	-0.511633	6.62523	0.00180927	0.138161	cytochrome B5 isoform D
AT5G54970	-0.906863	2.19713	0.00186079	0.138161
AT5G55280	0.519805	5.28454	0.00182189	0.138161	homolog of bacterial cytokinesis Z-ring protein FTSZ 1-1
AT5G56940	-0.661213	3.84285	0.00185342	0.138161	Ribosomal protein S16 family protein
AT1G75190	-0.523503	5.1913	0.00187605	0.138549
AT1G25275	-0.813301	5.20785	0.00192091	0.141057
AT5G27300	0.886482	2.73738	0.00192669	0.141057	pentatricopeptide (PPR) repeat-containing protein
AT1G49500	-0.764326	6.70827	0.00195362	0.142412
AT1G73850	-1.02404	1.99844	0.00199545	0.144837	Protein of unknown function (DUF1666)
AT3G14600	-0.5369	5.98939	0.00201852	0.145265	Ribosomal protein L18ae/LX family protein
AT4G23980	-0.605747	4.67594	0.00201135	0.145265	auxin response factor 9
AT1G01180	-0.790262	3.40836	0.00205993	0.147185	S-adenosyl-L-methionine-dependent methyltransferases superfamily protein
AT1G68238	-0.652166	3.82088	0.00206262	0.147185
AT3G52260	-0.8985	2.36504	0.00208345	0.147787	Pseudouridine synthase family protein
AT4G22960	0.885759	1.66786	0.00209268	0.147787	Protein of unknown function (DUF544)
AT5G61590	-0.898564	6.38792	0.00209726	0.147787	Integrase-type DNA-binding superfamily protein
AT5G13090	-0.682583	4.0771	0.00214494	0.150519
AT3G57785	-0.686801	3.9103	0.00217149	0.151753
AT5G36870	0.862598	3.37506	0.00221194	0.153944	glucan synthase-like 9
AT3G20680	-0.552418	5.10958	0.00223204	0.154706	Domain of unknown function (DUF1995)
AT1G20350	-1.13316	2.06006	0.00225054	0.155352	translocase inner membrane subunit 17-1
AT3G57230	-0.798796	3.13781	0.00230369	0.158374	AGAMOUS-like 16
AT1G73990	0.514096	6.17089	0.00233609	0.159951	signal peptide peptidase
AT5G55850	-0.632343	6.78241	0.00235729	0.160752	RPM1-interacting protein 4 (RIN4) family protein
AT1G15830	-0.636173	4.28396	0.00242173	0.163708
AT1G80180	-0.650399	7.06877	0.0024332	0.163708
AT2G26930	0.610195	4.487	0.00243116	0.163708	4-(cytidine 5'-phospho)-2-C-methyl-D-erithritol kinase
AT4G24920	-0.540877	4.0731	0.00243936	0.163708	secE/sec61-gamma protein transport protein
AT3G19020	-0.727639	3.35836	0.0024574	0.164267	Leucine-rich repeat (LRR) family protein
AT1G20340	-0.689276	11.1208	0.00252947	0.166488	Cupredoxin superfamily protein
AT2G41090	-0.589887	3.87145	0.00254176	0.166488	Calcium-binding EF-hand family protein
AT2G41870	-0.685402	3.89744	0.00253082	0.166488	Remorin family protein
AT2G44620	-0.493301	5.41101	0.002557	0.166488	mitochondrial acyl carrier protein 1
AT3G04230	-0.888165	2.00032	0.0025706	0.166488	Ribosomal protein S5 domain 2-like superfamily protein
AT3G09735	-0.524019	4.27949	0.00256871	0.166488	S1FA-like DNA-binding protein
AT3G11910	0.432332	5.82722	0.00257923	0.166488	ubiquitin-specific protease 13
AT3G55400	0.49762	6.03688	0.00255781	0.166488	methionyl-tRNA synthetase / methionine--tRNA ligase / MetRS (cpMetRS)
AT5G51545	-0.526024	5.54012	0.0025591	0.166488	low psii accumulation2
AT2G31410	-0.47472	5.75214	0.00262987	0.167884
AT3G10090	-0.576496	3.97726	0.00263698	0.167884	Nucleic acid-binding, OB-fold-like protein
AT3G45970	-0.840676	5.46098	0.00261098	0.167884	expansin-like A1
AT4G15000	-0.634275	6.59851	0.00264962	0.167884	Ribosomal L27e protein family
AT5G05330	-0.977344	1.29882	0.00265048	0.167884	HMG-box (high mobility group) DNA-binding family protein
AT1G71730	-0.751547	3.49614	0.0026633	0.168066
AT5G13190	-0.711791	4.567	0.00269672	0.169542
AT5G19240	-1.31747	6.74981	0.00271859	0.170284	Glycoprotein membrane precursor GPI-anchored
AT5G65610	-0.939084	2.20802	0.00274324	0.171194
AT3G07480	-0.548246	5.87399	0.00275923	0.171559	2Fe-2S ferredoxin-like superfamily protein
AT3G60050	-0.975198	2.14012	0.00279757	0.173306	Pentatricopeptide repeat (PPR) superfamily protein
AT1G09794	-0.86963	2.30643	0.00281	0.173441	Cox19 family protein (CHCH motif)
AT2G02740	0.636445	3.70369	0.00284104	0.174712	ssDNA-binding transcriptional regulator
AT3G23820	-0.608493	8.53697	0.00285126	0.174712	UDP-D-glucuronate 4-epimerase 6
AT5G53980	-1.29869	0.552941	0.00289052	0.176169	homeobox protein 52
AT5G58090	-0.787	5.51855	0.00289586	0.176169	O-Glycosyl hydrolases family 17 protein
AT5G42790	-0.468015	5.5436	0.00294495	0.178513	proteasome alpha subunit F1
AT1G66890	-0.746983	3.53022	0.00296841	0.178654
AT5G59690	-0.728776	5.29771	0.00296556	0.178654	Histone superfamily protein
AT3G25660	0.51218	7.1857	0.00301118	0.180585	Amidase family protein
AT5G51700	0.592885	3.63483	0.00303094	0.181128	protein binding;zinc ion binding
AT3G27340	-0.633801	3.5943	0.00304501	0.181328
AT1G33055	-0.670414	3.22928	0.00314708	0.186749
AT2G21010	-1.41797	0.465577	0.00319599	0.188298	Calcium-dependent lipid-binding (CaLB domain) family protein
AT4G00165	-0.864949	5.91632	0.00320658	0.188298	Bifunctional inhibitor/lipid-transfer protein/seed storage 2S albumin superfamily protein
AT5G47090	-0.584301	3.58152	0.00320436	0.188298
AT5G57887	-0.860548	2.76387	0.0032285	0.188929
AT4G32820	0.586137	4.12096	0.00327434	0.190917	Tetratricopeptide repeat (TPR)-like superfamily protein
AT5G54145	-0.712148	3.70911	0.00328505	0.190917
AT3G18020	-1.08147	1.18999	0.00330098	0.191186	Pentatricopeptide repeat (PPR) superfamily protein
AT1G12800	0.52794	7.94552	0.00333057	0.191253	Nucleic acid-binding, OB-fold-like protein
AT3G17780	-0.816777	3.34333	0.00332853	0.191253
AT3G60840	0.795696	3.27005	0.00333607	0.191253	microtubule-associated protein 65-4
AT1G69980	-0.641519	3.09398	0.00334879	0.191333
AT1G69020	-1.22354	1.09897	0.00337275	0.192054	Prolyl oligopeptidase family protein
AT1G54500	-0.772969	7.82912	0.00338449	0.192075	Rubredoxin-like superfamily protein
AT1G10960	-0.886061	9.28928	0.00345439	0.192807	ferredoxin 1
AT1G13245	-0.663765	5.97772	0.00343237	0.192807	ROTUNDIFOLIA like 17
AT2G01755	-0.705263	3.86327	0.00342948	0.192807
AT3G12080	0.465328	6.35996	0.00344931	0.192807	GTP-binding family protein
AT5G20180	-0.765753	3.35221	0.00342582	0.192807	Ribosomal protein L36
AT1G30880	-0.526313	5.35643	0.00349319	0.194094
AT2G29390	-0.545723	4.40035	0.00351186	0.194094	sterol 4-alpha-methyl-oxidase 2-2
AT4G33200	0.485561	4.84168	0.00350607	0.194094	myosin, putative
AT4G23430	0.43668	5.5474	0.00353521	0.194748	NAD(P)-binding Rossmann-fold superfamily protein
AT1G04010	-0.795676	2.36738	0.00355082	0.194972	phospholipid sterol acyl transferase 1
AT1G03106	-0.974038	2.8409	0.00362062	0.195409
AT3G26950	-0.496065	4.31243	0.00358957	0.195409
AT4G14342	-0.509548	5.01631	0.00361087	0.195409	Splicing factor 3B subunit 5/RDS3 complex subunit 10
AT5G14030	-0.460918	6.25221	0.00361293	0.195409	translocon-associated protein beta (TRAPB) family protein
AT5G55550	0.667049	3.31576	0.0036281	0.195409	RNA-binding (RRM/RBD/RNP motifs) family protein
AT5G64920	-0.552437	5.27326	0.00360817	0.195409	COP1-interacting protein 8
AT2G45520	-0.543912	4.10872	0.00365239	0.196093
AT3G41762	0.73814	5.92897	0.00366718	0.196264
AT1G09940	-0.709622	4.47834	0.00373384	0.198357	Glutamyl-tRNA reductase family protein
AT2G02100	-0.651055	6.19762	0.00372349	0.198357	low-molecular-weight cysteine-rich 69
AT5G50810	-0.685061	3.71886	0.00374149	0.198357	translocase inner membrane subunit 8
AT4G33760	0.526582	4.76588	0.00375335	0.198365	tRNA synthetase class II (D, K and N) family protein
AT1G03130	-0.673677	9.94137	0.00377096	0.198445	photosystem I subunit D-2
AT2G30930	-0.540475	6.03256	0.0037929	0.198445
AT3G50685	-0.707902	5.35514	0.00381354	0.198445
AT4G27350	-0.722228	3.66719	0.00378412	0.198445	Protein of unknown function (DUF1223)
AT4G36648	-0.665984	4.47647	0.00380889	0.198445	other RNA
AT4G16500	-0.732971	3.72222	0.00384917	0.199684	Cystatin/monellin superfamily protein
AT1G72500	0.503245	5.17746	0.00398317	0.204752
AT2G27385	-0.558149	6.77629	0.00397311	0.204752	Pollen Ole e 1 allergen and extensin family protein
AT5G14530	0.682851	2.64759	0.00397769	0.204752	Transducin/WD40 repeat-like superfamily protein
AT4G39730	-0.528901	6.31611	0.00405115	0.207615	Lipase/lipooxygenase, PLAT/LH2 family protein
AT2G34420	-0.567069	13.016	0.00413064	0.211049	photosystem II light harvesting complex gene B1B2
AT5G42070	-0.572769	4.85248	0.00414619	0.211206
AT4G35420	1.03619	1.9299	0.00419518	0.212422	dihydroflavonol 4-reductase-like1
AT5G06780	0.533548	3.92342	0.00418988	0.212422	Emsy N Terminus (ENT)/ plant Tudor-like domains-containing protein
AT3G27030	-0.692072	3.4334	0.00428171	0.214873
AT3G43980	-0.480776	5.06831	0.00425837	0.214873	Ribosomal protein S14p/S29e family protein
AT5G16930	-0.838432	2.44017	0.00427609	0.214873	AAA-type ATPase family protein
AT1G16030	-0.890768	4.13636	0.00437603	0.215454	heat shock protein 70B
AT1G30080	0.944246	1.98356	0.00431904	0.215454	Glycosyl hydrolase superfamily protein
AT3G46700	-0.799304	3.49256	0.00434604	0.215454	UDP-Glycosyltransferase superfamily protein
AT3G47295	-0.52502	4.81506	0.00436211	0.215454
AT3G54130	-0.75427	2.7421	0.00433581	0.215454	Josephin family protein
AT3G57150	-0.69166	6.5197	0.00439521	0.215454	homologue of NAP57
AT5G21274	-0.514592	5.13007	0.00438322	0.215454	calmodulin 6
AT5G50340	0.689018	3.35327	0.00438726	0.215454	ATP-dependent peptidases;nucleotide binding;serine-type endopeptidases;DNA helicases;ATP binding;damaged DNA binding;nucleoside-triphosphatases
AT2G21580	-0.474024	5.72913	0.00441505	0.215802	Ribosomal protein S25 family protein
AT1G72610	-0.974033	3.57615	0.00444983	0.216875	germin-like protein 1
AT2G32860	0.768459	4.98788	0.0044933	0.218364	beta glucosidase 33
AT2G47840	-0.564434	4.14443	0.00451419	0.218751	Uncharacterised conserved protein ycf60
AT3G01170	-0.57586	3.74002	0.0045574	0.220214	Ribosomal protein L34e superfamily protein
AT4G38680	-0.518928	7.5816	0.00457473	0.220421	glycine rich protein 2
AT1G21120	-1.04035	4.66864	0.00461058	0.220578	O-methyltransferase family protein
AT1G63100	-0.852739	2.8196	0.00462386	0.220578	GRAS family transcription factor
AT1G69770	0.811528	3.99179	0.00463015	0.220578	chromomethylase 3
AT4G24972	-0.525029	4.93985	0.00462272	0.220578	tapetum determinant 1
AT3G23660	0.50624	4.60336	0.0046583	0.221296	Sec23/Sec24 protein transport family protein
AT1G14060	-0.801473	2.24892	0.00470235	0.222762	GCK domain-containing protein
AT5G52070	-0.698808	3.93592	0.00475203	0.224487	Agenet domain-containing protein
AT1G23290	-0.638527	6.47307	0.00476774	0.224602	Ribosomal protein L18e/L15 superfamily protein
AT1G21930	-0.521455	3.96796	0.00482185	0.225469
AT1G34750	-0.670287	2.87112	0.00482614	0.225469	Protein phosphatase 2C family protein
AT2G28740	-0.667689	4.08711	0.00481278	0.225469	histone H4
AT1G06640	0.486251	5.6609	0.00491723	0.227118	2-oxoglutarate (2OG) and Fe(II)-dependent oxygenase superfamily protein
AT1G09645	-0.673093	3.40241	0.00490891	0.227118
AT1G78670	-0.484322	5.22706	0.00491658	0.227118	gamma-glutamyl hydrolase 3
AT2G04390	-0.481861	6.03709	0.00493245	0.227118	Ribosomal S17 family protein
AT2G23200	-0.654918	3.13166	0.00497978	0.227118	Protein kinase superfamily protein
AT2G36430	-0.569606	3.67282	0.00499434	0.227118	Plant protein of unknown function (DUF247)
AT3G10700	0.63297	3.41742	0.00494791	0.227118	galacturonic acid kinase
AT4G09800	-0.517659	7.16382	0.00498663	0.227118	S18 ribosomal protein
AT4G21192	-0.787533	2.52796	0.00487855	0.227118	Cytochrome c oxidase biogenesis protein Cmc1-like
AT5G35630	0.552248	11.0966	0.00499573	0.227118	glutamine synthetase 2
AT1G17870	0.76394	5.81716	0.005081	0.230375	ethylene-dependent gravitropism-deficient and yellow-green-like 3
AT2G37250	-0.523624	4.91084	0.00513429	0.23155	adenosine kinase
AT4G14430	-0.481462	5.17697	0.00512512	0.23155	indole-3-butyric acid response 10
AT1G25098	-0.666146	5.82846	0.00516692	0.231785	other RNA
AT2G23930	-0.451229	5.5693	0.00516144	0.231785	probable small nuclear ribonucleoprotein G
AT3G03300	0.759682	3.81024	0.00525791	0.235243	dicer-like 2
AT2G02130	-0.718707	6.16943	0.00528576	0.235865	low-molecular-weight cysteine-rich 68
AT5G35740	-0.780222	2.56753	0.00535902	0.238505	Carbohydrate-binding X8 domain superfamily protein
AT1G78850	-0.920469	7.2409	0.00541215	0.239158	D-mannose binding lectin protein with Apple-like carbohydrate-binding domain
AT2G47850	-0.522044	4.26759	0.00541612	0.239158	Zinc finger C-x8-C-x5-C-x3-H type family protein
AT3G10450	-0.551367	4.45993	0.005393	0.239158	serine carboxypeptidase-like 7
AT5G51550	-0.530456	5.68187	0.00544481	0.239799	EXORDIUM like 3
AT1G27310	-0.429827	5.69381	0.00546563	0.24009	nuclear transport factor 2A
AT2G15555	-1.00806	1.96449	0.00553723	0.242605	other RNA
AT3G53240	-0.765467	2.98463	0.00561565	0.245405	receptor like protein 45
AT1G10510	0.495167	5.84579	0.00572001	0.24564	RNI-like superfamily protein
AT1G33140	-0.588263	5.65	0.00567294	0.24564	Ribosomal protein L6 family
AT2G34150	1.03215	1.58245	0.00566183	0.24564	SCAR family protein
AT3G46630	-0.499329	4.93488	0.00568442	0.24564	Protein of unknown function (DUF3223)
AT3G50360	-0.506013	4.85532	0.0057227	0.24564	centrin2
AT3G53100	-0.57797	4.22195	0.00569354	0.24564	GDSL-like Lipase/Acylhydrolase superfamily protein
AT4G16765	0.805529	2.1663	0.00570259	0.24564	2-oxoglutarate (2OG) and Fe(II)-dependent oxygenase superfamily protein
AT2G04410	-0.472455	5.89919	0.0057573	0.245877	RPM1-interacting protein 4 (RIN4) family protein
AT2G19750	-0.604277	4.34475	0.00574669	0.245877	Ribosomal protein S30 family protein
AT1G77080	-0.578845	3.66259	0.00578797	0.245945	K-box region and MADS-box transcription factor family protein
AT5G04140	0.576185	10.4508	0.00577707	0.245945	glutamate synthase 1
AT4G26870	0.454472	5.32681	0.00581198	0.246346	Class II aminoacyl-tRNA and biotin synthetases superfamily protein
AT5G06870	-0.918169	4.79395	0.00584686	0.247205	polygalacturonase inhibiting protein 2
AT2G35470	-0.582178	3.98404	0.00596707	0.251032
AT3G57450	-0.972186	3.99085	0.005959	0.251032
AT4G13180	-0.533548	6.07472	0.00600497	0.251442	NAD(P)-binding Rossmann-fold superfamily protein
AT5G48460	0.597746	4.01596	0.00601716	0.251442	Actin binding Calponin homology (CH) domain-containing protein
AT5G64900	-1.09253	1.00116	0.00602141	0.251442	precursor of peptide 1
AT2G39920	-1.15638	0.804873	0.00604119	0.251647	HAD superfamily, subfamily IIIB acid phosphatase
AT3G54110	0.419232	5.06371	0.00605623	0.251653	plant uncoupling mitochondrial protein 1
AT1G57540	-0.866389	1.47823	0.00613375	0.25425
AT2G36830	-0.507671	10.0398	0.0062041	0.256537	gamma tonoplast intrinsic protein
AT1G69620	-0.486314	6.89474	0.00624972	0.257019	ribosomal protein L34
AT4G21570	-0.559829	5.66871	0.00623149	0.257019	Protein of unknown function (DUF300)
AT4G29390	-0.524773	6.47544	0.00626133	0.257019	Ribosomal protein S30 family protein
AT5G22580	-1.15234	1.82465	0.00631673	0.258665	Stress responsive A/B Barrel Domain
AT3G57320	-0.953363	1.93131	0.00637185	0.260292
AT1G73940	-0.667321	3.8244	0.00639672	0.260678
AT5G52190	-0.662639	3.544	0.00644766	0.262122	Sugar isomerase (SIS) family protein
AT3G18485	-0.722334	3.2457	0.00656436	0.26376	iaa-leucine resistant 2
AT3G56360	-0.560996	7.91007	0.00656592	0.26376
AT3G61980	-0.736932	2.89476	0.00653841	0.26376	serine protease inhibitor, Kazal-type family protein
AT4G20840	-0.422091	5.31411	0.00653793	0.26376	FAD-binding Berberine family protein
AT5G12190	-0.534359	3.70506	0.00653198	0.26376	RNA-binding (RRM/RBD/RNP motifs) family protein
AT4G13510	-0.801612	2.33694	0.00664542	0.266321	ammonium transporter 1;1
AT4G18550	0.972689	1.56266	0.00675595	0.270091	alpha/beta-Hydrolases superfamily protein
AT4G30440	-0.529253	6.53174	0.00677145	0.270091	UDP-D-glucuronate 4-epimerase 1
AT5G60670	-0.71632	4.72616	0.00683882	0.272137	Ribosomal protein L11 family protein
AT1G15930	-0.492994	7.22026	0.00689211	0.27352	Ribosomal protein L7Ae/L30e/S12e/Gadd45 family protein
AT4G38550	-0.852674	3.64822	0.00690593	0.27352	Arabidopsis phospholipase-like protein (PEARLI 4) family
AT3G03380	0.432521	5.92987	0.00693423	0.273999	DegP protease 7
AT2G17120	-0.578198	5.0923	0.00695589	0.274214	lysm domain GPI-anchored protein 2 precursor
AT4G08280	-0.598624	4.30879	0.00697485	0.274322	Thioredoxin superfamily protein
AT1G42970	0.54234	11.7954	0.00701153	0.274489	glyceraldehyde-3-phosphate dehydrogenase B subunit
AT2G03470	-0.440053	4.88786	0.00701064	0.274489	ELM2 domain-containing protein
AT3G11945	0.4966	6.07274	0.00707194	0.276214	homogentisate prenyltransferase
AT1G70600	-0.555262	6.5976	0.00711134	0.277113	Ribosomal protein L18e/L15 superfamily protein
AT1G80890	-0.777925	2.13631	0.00715749	0.27827
AT1G01500	-0.628441	3.04602	0.00721396	0.279182	Erythronate-4-phosphate dehydrogenase family protein
AT5G58575	-0.704469	3.16735	0.00721223	0.279182
AT1G02410	0.511779	3.73059	0.00733183	0.280988	cytochrome c oxidase assembly protein CtaG / Cox11 family
AT1G47395	-0.973931	3.7027	0.00730722	0.280988
AT2G22425	-0.530299	4.29158	0.0074434	0.280988	Microsomal signal peptidase 12 kDa subunit (SPC12)
AT2G37470	-0.728929	4.06928	0.00742874	0.280988	Histone superfamily protein
AT3G51050	-0.408797	5.88121	0.00731106	0.280988	FG-GAP repeat-containing protein
AT4G01915	1.20066	0.89058	0.00735062	0.280988
AT4G33865	-0.538313	6.8144	0.00741089	0.280988	Ribosomal protein S14p/S29e family protein
AT4G36190	-0.517001	4.98696	0.00736635	0.280988	Serine carboxypeptidase S28 family protein
AT5G12020	-1.10654	6.90401	0.00741118	0.280988	17.6 kDa class II heat shock protein
AT5G45140	0.545873	4.24012	0.00732148	0.280988	nuclear RNA polymerase C2
AT5G53300	-0.527883	8.8735	0.00738267	0.280988	ubiquitin-conjugating enzyme 10
AT1G12090	-0.550171	9.40047	0.00755685	0.28226	extensin-like protein
AT1G71950	-0.582582	4.01892	0.00759535	0.28226	Proteinase inhibitor, propeptide
AT2G35510	0.481038	4.93824	0.00758697	0.28226	similar to RCD one 1
AT2G45590	-0.480062	5.26686	0.00758682	0.28226	Protein kinase superfamily protein
AT3G04160	0.764309	3.2189	0.00759072	0.28226
AT3G60530	-0.628176	4.26933	0.00754817	0.28226	GATA transcription factor 4
AT5G03650	0.508908	6.89473	0.00758342	0.28226	starch branching enzyme 2.2
AT5G44210	-0.870421	1.08396	0.00761061	0.28226	erf domain protein 9
AT2G41670	-0.871778	1.45186	0.00769862	0.284147	P-loop containing nucleoside triphosphate hydrolases superfamily protein
AT5G21020	0.597351	6.27507	0.00769056	0.284147
AT5G66210	-1.09245	4.40744	0.00771189	0.284147	calcium-dependent protein kinase 28
AT1G08700	-0.503655	4.77985	0.00780398	0.285673	Presenilin-1
AT3G27890	-0.461379	4.72856	0.00780359	0.285673	NADPH:quinone oxidoreductase
AT5G10110	0.757093	2.46136	0.007803	0.285673
AT1G61010	0.42006	4.71089	0.00795355	0.286192	cleavage and polyadenylation specificity factor 73-I
AT1G75960	-0.801705	2.29899	0.00791451	0.286192	AMP-dependent synthetase and ligase family protein
AT2G15980	-0.84281	1.97926	0.00789961	0.286192	Tetratricopeptide repeat (TPR)-like superfamily protein
AT2G19280	0.786986	2.92852	0.00792198	0.286192	Pentatricopeptide repeat (PPR) superfamily protein
AT2G33850	-0.927976	5.94819	0.00793307	0.286192
AT3G22480	-0.462156	4.0769	0.00787838	0.286192	prefoldin 2
AT4G23930	0.951503	1.67808	0.00793912	0.286192	Late embryogenesis abundant (LEA) hydroxyproline-rich glycoprotein family
AT5G49480	-0.595348	6.84856	0.00792995	0.286192	Ca2+-binding protein 1
AT2G32090	-0.543604	4.6171	0.00801188	0.28707	Lactoylglutathione lyase / glyoxalase I family protein
AT4G37130	-0.50589	4.14758	0.00800604	0.28707	hydroxyproline-rich glycoprotein family protein
AT1G22840	-0.503371	5.6633	0.00806385	0.287767	CYTOCHROME C-1
AT1G64750	-0.442739	5.46497	0.0080994	0.287767	deletion of SUV3 suppressor 1(I)
AT2G39705	-0.702097	2.78868	0.00807343	0.287767	ROTUNDIFOLIA like 8
AT3G61640	-0.805225	3.43551	0.00809836	0.287767	arabinogalactan protein 20
AT1G06960	-0.621781	2.77335	0.00821802	0.28842	RNA-binding (RRM/RBD/RNP motifs) family protein
AT1G10590	-0.397217	5.92782	0.00825421	0.28842	Nucleic acid-binding, OB-fold-like protein
AT1G15250	-0.797753	2.79538	0.00817843	0.28842	Zinc-binding ribosomal protein family protein
AT1G16040	-0.743897	2.09861	0.00817399	0.28842
AT3G50790	0.45522	5.20863	0.00819849	0.28842	esterase/lipase/thioesterase family protein
AT3G58700	-0.493295	5.42823	0.00823841	0.28842	Ribosomal L5P family protein
AT4G34700	-0.459299	6.11779	0.00814409	0.28842	LYR family of Fe/S cluster biogenesis protein
AT5G06770	-0.535214	3.73876	0.00823397	0.28842	KH domain-containing protein / zinc finger (CCCH type) family protein
AT1G07610	-0.507888	6.51837	0.00840451	0.288472	metallothionein 1C
AT1G52150	0.597833	3.8708	0.00831409	0.288472	Homeobox-leucine zipper family protein / lipid-binding START domain-containing protein
AT2G03330	-0.770502	1.77464	0.00842116	0.288472
AT2G04850	0.645667	2.66983	0.00840227	0.288472	Auxin-responsive family protein
AT2G15960	-1.14429	5.13199	0.00831188	0.288472
AT2G20570	0.718551	5.15557	0.00837411	0.288472	GBF's pro-rich region-interacting factor 1
AT2G38170	-0.481754	7.0198	0.0083866	0.288472	cation exchanger 1
AT3G02770	-0.661561	3.32553	0.00842626	0.288472	Ribonuclease E inhibitor RraA/Dimethylmenaquinone methyltransferase
AT5G58340	0.743585	3.39838	0.00836539	0.288472	myb-like HTH transcriptional regulator family protein
AT5G66005	-0.911072	2.31079	0.00831795	0.288472	Expressed protein
AT5G59250	0.441527	6.55417	0.00846751	0.289298	Major facilitator superfamily protein
AT1G15120	-0.452371	5.73719	0.00855679	0.29104	Ubiquinol-cytochrome C reductase hinge protein
AT2G34640	0.502846	6.72987	0.00857012	0.29104	plastid transcriptionally active 12
AT4G37930	0.553405	11.7913	0.00853885	0.29104	serine transhydroxymethyltransferase 1
AT2G17110	-0.557989	3.44666	0.00859861	0.2914	Protein of unknown function (DUF630 and DUF632)
AT5G25940	-0.625577	3.8504	0.00861517	0.2914	early nodulin-related
AT2G38050	-0.521968	3.48178	0.00868479	0.293168	3-oxo-5-alpha-steroid 4-dehydrogenase family protein
AT1G04570	-1.1563	0.488402	0.00878495	0.293293	Major facilitator superfamily protein
AT1G53290	-0.75672	2.6822	0.00877507	0.293293	Galactosyltransferase family protein
AT2G40550	0.577826	3.32656	0.00872454	0.293293	E2F target gene 1
AT2G42390	-0.59614	2.99754	0.00881277	0.293293	protein kinase C substrate, heavy chain-related
AT3G03070	-0.45591	6.03746	0.00875875	0.293293	NADH-ubiquinone oxidoreductase-related
AT4G13940	-0.529416	9.54553	0.00879719	0.293293	S-adenosyl-L-homocysteine hydrolase
AT4G15470	-0.471503	6.94199	0.00876559	0.293293	Bax inhibitor-1 family protein
AT4G36780	-0.46493	4.92896	0.00883182	0.293293	BES1/BZR1 homolog 2
AT5G01590	0.440146	7.11542	0.00884459	0.293293
AT5G16130	-0.498547	7.53577	0.00888496	0.294056	Ribosomal protein S7e family protein
AT2G38540	-0.591231	8.48305	0.00892975	0.294961	lipid transfer protein 1
AT5G16420	-0.933732	1.07274	0.00895388	0.295181	Pentatricopeptide repeat (PPR-like) superfamily protein
AT1G07170	-0.590634	3.15647	0.00924875	0.296557	PHF5-like protein
AT2G14880	-0.539017	5.41362	0.00915008	0.296557	SWIB/MDM2 domain superfamily protein
AT2G40330	-0.596819	3.52547	0.00925864	0.296557	PYR1-like 6
AT2G42370	-0.792783	2.01425	0.00918165	0.296557
AT2G46330	-0.524259	5.79855	0.00920899	0.296557	arabinogalactan protein 16
AT3G08520	-0.576573	4.15994	0.00909826	0.296557	Ribosomal protein L41 family
AT3G12180	-0.648552	2.36509	0.00919934	0.296557	Cornichon family protein
AT3G13845	-0.610273	2.74399	0.00906192	0.296557
AT3G15010	0.489283	4.46252	0.00914245	0.296557	RNA-binding (RRM/RBD/RNP motifs) family protein
AT3G44860	-0.586725	3.76646	0.00916073	0.296557	farnesoic acid carboxyl-O-methyltransferase
AT3G45030	-0.449203	6.73236	0.00912279	0.296557	Ribosomal protein S10p/S20e family protein
AT3G51660	-0.483477	4.37432	0.00907328	0.296557	Tautomerase/MIF superfamily protein
AT4G02770	-0.604144	10.7315	0.00920434	0.296557	photosystem I subunit D-1
AT4G29260	-0.453704	4.78656	0.00924906	0.296557	HAD superfamily, subfamily IIIB acid phosphatase
AT5G65480	-0.602181	7.15001	0.00911242	0.296557
AT2G41940	-0.700305	5.36115	0.00928685	0.296898	zinc finger protein 8
AT3G43810	-0.53977	6.20304	0.00934362	0.297588	calmodulin 7
AT5G15190	-1.20566	0.830113	0.00933986	0.297588
AT5G03850	-0.548586	6.14703	0.00939305	0.2986	Nucleic acid-binding, OB-fold-like protein
AT1G27630	-0.460891	4.38431	0.00942352	0.298693	cyclin T 1;3
AT5G10695	-1.13503	2.86673	0.00943128	0.298693
AT1G02110	0.45882	4.46436	0.00953864	0.300179	Protein of unknown function (DUF630 and DUF632)
AT3G15810	-0.426598	5.46775	0.00953931	0.300179	Protein of unknown function (DUF567)
AT4G22000	-0.501247	4.92808	0.00954214	0.300179
AT5G02280	-0.628088	2.70577	0.00954922	0.300179	SNARE-like superfamily protein
AT2G01008	0.66753	7.2147	0.00958547	0.300203
AT5G20740	-0.880068	2.09283	0.0095796	0.300203	Plant invertase/pectin methylesterase inhibitor superfamily protein
AT1G20910	0.632784	3.25155	0.00965819	0.301921	ARID/BRIGHT DNA-binding domain-containing protein
AT1G73030	-0.524819	6.26153	0.00969704	0.302576	SNF7 family protein
AT1G05160	-0.737786	2.89516	0.00978458	0.303071	cytochrome P450, family 88, subfamily A, polypeptide 3
AT3G07640	-0.541678	3.08972	0.00977357	0.303071
AT5G19620	0.464106	4.69028	0.00975523	0.303071	outer envelope protein of 80 kDa
AT5G62340	-0.935377	4.21743	0.00973246	0.303071	Plant invertase/pectin methylesterase inhibitor superfamily protein
AT4G12490	-1.3409	1.95245	0.00991015	0.306049	Bifunctional inhibitor/lipid-transfer protein/seed storage 2S albumin superfamily protein
AT4G14440	-0.672701	4.58405	0.00991691	0.306049	3-hydroxyacyl-CoA dehydratase 1
AT4G25890	-0.621422	4.25771	0.00994589	0.306384	60S acidic ribosomal protein family
AT2G21060	-0.446873	5.71523	0.0100106	0.306664	glycine-rich protein 2B
AT3G05500	-0.486551	4.51315	0.0100256	0.306664	Rubber elongation factor protein (REF)
AT4G15840	0.434857	4.4698	0.00997992	0.306664	BTB/POZ domain-containing protein
AT5G12860	0.539246	8.09201	0.0100275	0.306664	dicarboxylate transporter 1
AT2G04030	0.521427	9.20194	0.0100768	0.307616	Chaperone protein htpG family protein
AT2G31650	-0.676348	2.52196	0.0100961	0.307649	homologue of trithorax
AT2G06925	-0.643059	3.72573	0.0102358	0.308906	Phospholipase A2 family protein
AT2G29910	-0.870722	2.9089	0.0102835	0.308906	F-box/RNI-like superfamily protein
AT3G22120	-0.511345	8.13637	0.0102429	0.308906	cell wall-plasma membrane linker protein
AT3G45750	0.935411	2.35605	0.0102657	0.308906	Nucleotidyltransferase family protein
AT4G23890	-0.534718	7.68657	0.0102821	0.308906
AT4G27720	-0.537367	5.39991	0.0102758	0.308906	Major facilitator superfamily protein
AT5G22210	-0.515308	4.11856	0.0101901	0.308906
AT5G66380	0.553702	4.18609	0.0102131	0.308906	folate transporter 1
AT1G02140	-0.401207	6.44062	0.0104023	0.311922	mago nashi family protein
AT1G29980	-0.783649	2.90719	0.0104252	0.312056	Protein of unknown function, DUF642
AT5G08290	-0.389948	6.27325	0.0104487	0.312205	mRNA splicing factor, thioredoxin-like U5 snRNP
AT1G06560	0.593956	3.17294	0.010568	0.312337	NOL1/NOP2/sun family protein
AT1G64440	0.708999	2.9902	0.0105183	0.312337	NAD(P)-binding Rossmann-fold superfamily protein
AT2G33435	-0.476218	4.79668	0.0105946	0.312337	RNA-binding (RRM/RBD/RNP motifs) family protein
AT3G07230	-0.557316	4.78104	0.0105284	0.312337	wound-responsive protein-related
AT3G20500	-0.516606	4.60927	0.0106193	0.312337	purple acid phosphatase 18
AT3G59840	-0.691918	3.00953	0.0105295	0.312337
AT4G40045	-0.600285	4.97534	0.0105277	0.312337
AT5G26570	0.444662	6.26461	0.0105664	0.312337	catalytics;carbohydrate kinases;phosphoglucan, water dikinases
AT5G43970	-0.608064	4.42465	0.0106124	0.312337	translocase of outer membrane 22-V
AT1G50730	0.495158	3.81153	0.010704	0.31313
AT3G63160	-0.736627	6.69138	0.0106718	0.31313
AT4G36900	-0.777307	3.2279	0.0107203	0.31313	related to AP2 10
AT4G38280	0.5915	3.71007	0.0106898	0.31313
AT3G51500	-0.502921	4.00714	0.0107461	0.31334
AT1G56423	-0.520901	3.51871	0.0108044	0.314499
AT3G04870	0.448778	7.80167	0.010864	0.315691	zeta-carotene desaturase
AT1G01100	-0.532483	7.29805	0.0109239	0.316886	60S acidic ribosomal protein family
AT1G31173	-0.848945	1.84193	0.0110026	0.318079	MIR167D; miRNA
AT5G20050	-0.571543	4.78118	0.0109919	0.318079	Protein kinase superfamily protein
AT3G05020	-0.517674	6.16199	0.011038	0.318297	acyl carrier protein 1
AT3G48030	-0.698735	2.1959	0.0110478	0.318297	hypoxia-responsive family protein / zinc finger (C3HC4-type RING finger) family protein
AT3G49720	-0.429057	6.1875	0.0111314	0.320161
AT3G09560	0.564827	3.91961	0.0113065	0.323936	Lipin family protein
AT3G26780	-0.44754	5.04322	0.0113025	0.323936	Phosphoglycerate mutase family protein
AT5G42440	-0.889858	2.05585	0.0113201	0.323936	Protein kinase superfamily protein
AT1G01230	-0.529679	3.45229	0.0113506	0.324258	ORMDL family protein
AT5G62360	-0.709136	4.20709	0.0113967	0.325028	Plant invertase/pectin methylesterase inhibitor superfamily protein
AT4G36570	-0.895175	2.06088	0.0114244	0.325268	RAD-like 3
AT3G03160	-0.613558	3.2503	0.011452	0.325508
AT5G65880	-0.950272	1.39481	0.0114845	0.325883
AT1G08580	-0.504006	4.03622	0.0115504	0.326655
AT2G20480	-1.01785	0.697072	0.0115481	0.326655
AT2G30330	-0.651877	2.44094	0.0115699	0.326661	GCN5L1 family protein
AT5G63910	-0.491314	4.74035	0.0115955	0.326838	farnesylcysteine lyase
AT2G43550	-0.739273	4.22367	0.0116327	0.327342	Scorpion toxin-like knottin superfamily protein
AT3G19170	0.541358	8.84188	0.0116978	0.328627	presequence protease 1
AT1G20670	-0.400357	5.28607	0.0118017	0.330448	DNA-binding bromodomain-containing protein
AT1G79660	-0.592082	3.06473	0.0118016	0.330448
AT3G12690	-0.739343	2.53325	0.0118699	0.331809	AGC kinase 1.5
AT4G36945	-0.710523	2.16875	0.0120493	0.335712	PLC-like phosphodiesterases superfamily protein
AT5G58920	-0.490471	4.32216	0.0120464	0.335712
AT1G06950	0.434755	7.34163	0.012085	0.336155	translocon at the inner envelope membrane of chloroplasts 110
AT3G25800	0.421979	5.07951	0.0121272	0.336223	protein phosphatase 2A subunit A2
AT3G57560	-0.445006	4.87005	0.0121192	0.336223	N-acetyl-l-glutamate kinase
AT1G13980	0.404024	4.80983	0.0126584	0.338198	sec7 domain-containing protein
AT1G21170	0.464579	4.18561	0.0124771	0.338198	Exocyst complex component SEC5
AT1G27130	-0.501511	5.20556	0.0126286	0.338198	glutathione S-transferase tau 13
AT1G30680	0.431033	5.32594	0.0126508	0.338198	toprim domain-containing protein
AT1G31170	-0.586708	3.95138	0.0123172	0.338198	sulfiredoxin
AT1G49320	-0.637551	4.19863	0.0124488	0.338198	unknown seed protein like 1
AT1G52370	0.508959	3.72441	0.0125993	0.338198	Ribosomal protein L22p/L17e family protein
AT1G65490	-0.666217	4.62531	0.0125022	0.338198
AT1G67120	0.426068	5.34708	0.0125319	0.338198	ATPases;nucleotide binding;ATP binding;nucleoside-triphosphatases;transcription factor binding
AT1G68600	-0.930061	1.8686	0.0125935	0.338198	Aluminium activated malate transporter family protein
AT1G71430	-0.81473	1.77459	0.012396	0.338198
AT2G21290	-0.440256	5.23669	0.0123963	0.338198
AT2G29890	0.727263	2.60658	0.0123765	0.338198	villin-like 1
AT3G05935	0.719061	1.8039	0.01246	0.338198
AT3G13520	-0.589879	6.68435	0.0123921	0.338198	arabinogalactan protein 12
AT4G17245	-0.488294	5.52184	0.0125336	0.338198	RING/U-box superfamily protein
AT4G27230	-0.491048	4.64404	0.0123181	0.338198	histone H2A 2
AT4G29530	-0.965492	0.810519	0.0124418	0.338198	Pyridoxal phosphate phosphatase-related protein
AT4G32450	0.671894	2.56248	0.0126104	0.338198	Pentatricopeptide repeat (PPR) superfamily protein
AT5G10020	0.471134	4.33084	0.0125735	0.338198	Leucine-rich receptor-like protein kinase family protein
AT5G11760	-0.419586	4.33126	0.0124741	0.338198
AT5G14680	-0.609405	3.61115	0.012264	0.338198	Adenine nucleotide alpha hydrolases-like superfamily protein
AT5G41560	-0.555615	2.98717	0.0122254	0.338198
AT1G08250	-0.592071	3.51947	0.0126818	0.338289	arogenate dehydratase 6
AT5G59070	-1.06981	1.15649	0.012706	0.3384	UDP-Glycosyltransferase superfamily protein
AT3G15300	-0.771943	2.78477	0.0127754	0.339714	VQ motif-containing protein
AT4G23630	-0.391617	6.56121	0.0128344	0.340746	VIRB2-interacting protein 1
AT4G28200	0.437424	4.81839	0.0128713	0.34119
AT5G16270	0.399385	5.91009	0.0129204	0.341956	sister chromatid cohesion 1 protein 4
AT1G05940	-0.408072	5.21503	0.0131949	0.34354	cationic amino acid transporter 9
AT1G32220	0.549275	7.09841	0.0131625	0.34354	NAD(P)-binding Rossmann-fold superfamily protein
AT1G35310	-0.777548	3.19011	0.0130279	0.34354	MLP-like protein 168
AT1G61570	-0.722156	2.6784	0.0131235	0.34354	translocase of the inner mitochondrial membrane 13
AT1G65290	-0.486178	4.27028	0.0131052	0.34354	mitochondrial acyl carrier protein 2
AT2G01400	-0.843842	1.39931	0.0131979	0.34354
AT3G13470	0.468014	8.30504	0.0132056	0.34354	TCP-1/cpn60 chaperonin family protein
AT3G25890	-0.471288	4.07795	0.013092	0.34354	Integrase-type DNA-binding superfamily protein
AT3G53280	-0.582487	5.88499	0.013224	0.34354	cytochrome p450 71b5
AT4G38700	-0.914045	1.737	0.0130298	0.34354	Disease resistance-responsive (dirigent-like protein) family protein
AT5G13440	-0.407763	6.93633	0.0130805	0.34354	Ubiquinol-cytochrome C reductase iron-sulfur subunit
AT5G15770	-0.933863	2.54375	0.013047	0.34354	glucose-6-phosphate acetyltransferase 1
AT1G07590	-0.49349	8.85178	0.0133017	0.345027	Tetratricopeptide repeat (TPR)-like superfamily protein
AT3G24360	-0.927577	1.02063	0.0134038	0.347143	ATP-dependent caseinolytic (Clp) protease/crotonase family protein
AT3G26000	-0.550728	5.31107	0.0134877	0.347801	Ribonuclease inhibitor
AT4G33666	-0.564418	5.338	0.0134908	0.347801
AT5G42750	-0.531914	4.82899	0.013482	0.347801	BRI1 kinase inhibitor 1
AT5G27750	0.74573	1.91233	0.0135246	0.348141	F-box/FBD-like domains containing protein
AT1G51080	-0.543019	4.17444	0.0135808	0.348735
AT5G27820	-0.652879	2.75787	0.013589	0.348735	Ribosomal L18p/L5e family protein
AT3G62220	0.561717	2.81408	0.0136289	0.349232	Protein kinase superfamily protein
AT1G12845	-0.662656	3.53447	0.0137188	0.351002
AT1G20850	0.467552	5.0991	0.0138394	0.353552	xylem cysteine peptidase 2
AT1G13180	-0.702654	2.62705	0.0138803	0.353739	Actin-like ATPase superfamily protein
AT1G23530	-0.766958	1.71544	0.0138885	0.353739
AT5G47800	0.867726	1.38156	0.0139203	0.354016	Phototropic-responsive NPH3 family protein
AT1G79600	0.521075	8.49697	0.0139531	0.354224	Protein kinase superfamily protein
AT4G32880	0.455948	4.61057	0.0139704	0.354224	homeobox gene 8
AT5G19250	-0.499283	8.02078	0.014021	0.354976	Glycoprotein membrane precursor GPI-anchored
AT4G32970	-0.676749	2.07635	0.0141214	0.356981
AT1G10230	-0.853085	2.2259	0.014184	0.357848	SKP1-like 18
AT2G24290	-0.571089	2.90035	0.014198	0.357848	Protein of unknown function (DUF1068)
AT1G28230	-0.5607	3.14563	0.0143611	0.359946	purine permease 1
AT1G33102	-0.943248	1.30556	0.0143247	0.359946
AT1G56190	0.457325	7.6977	0.0143876	0.359946	Phosphoglycerate kinase family protein
AT1G60950	-0.696325	10.5089	0.0143613	0.359946	2Fe-2S ferredoxin-like superfamily protein
AT3G60680	0.726897	1.86216	0.01438	0.359946	Plant protein of unknown function (DUF641)
AT1G07150	-1.0384	2.76929	0.0145072	0.361439	mitogen-activated protein kinase kinase kinase 13
AT1G29640	-0.826294	1.64156	0.0145114	0.361439	Protein of unknown function, DUF584
AT2G44850	-0.678616	2.03565	0.0144847	0.361439
AT1G01790	0.441645	6.4095	0.0153484	0.362574	K+ efflux antiporter 1
AT1G04290	-0.927422	1.38195	0.015127	0.362574	Thioesterase superfamily protein
AT1G11220	-1.15852	0.558852	0.0149989	0.362574	Protein of unknown function (DUF761)
AT1G11430	-0.414501	6.34488	0.0152874	0.362574	plastid developmental protein DAG, putative
AT1G21500	-0.657483	8.11074	0.0146648	0.362574
AT1G25350	0.366198	6.15723	0.0147828	0.362574	glutamine-tRNA ligase, putative / glutaminyl-tRNA synthetase, putative / GlnRS, putative
AT1G56050	0.424151	4.87557	0.0149211	0.362574	GTP-binding protein-related
AT1G61760	-0.84113	1.33953	0.0148695	0.362574	Late embryogenesis abundant (LEA) hydroxyproline-rich glycoprotein family
AT1G63640	0.417405	4.29087	0.0152264	0.362574	P-loop nucleoside triphosphate hydrolases superfamily protein with CH (Calponin Homology) domain
AT1G68560	-0.518275	7.63192	0.015012	0.362574	alpha-xylosidase 1
AT1G69230	-0.795155	2.86597	0.0148816	0.362574	SPIRAL1-like2
AT1G70610	0.423469	5.41369	0.0152272	0.362574	transporter associated with antigen processing protein 1
AT1G80120	-0.858732	1.76723	0.0152961	0.362574	Protein of unknown function (DUF567)
AT2G18440	-0.502052	5.20873	0.0146678	0.362574	GUT15 (GENE WITH UNSTABLE TRANSCRIPT 15); other RNA
AT2G18440	-0.502052	5.20873	0.0146678	0.362574
AT2G22490	-0.435209	4.38654	0.0146528	0.362574	Cyclin D2;1
AT2G23070	0.419598	6.44028	0.0149737	0.362574	Protein kinase superfamily protein
AT2G26580	-0.56798	3.62178	0.0152953	0.362574	plant-specific transcription factor YABBY family protein
AT2G45710	-0.615961	2.69505	0.0152075	0.362574	Zinc-binding ribosomal protein family protein
AT3G04610	0.388317	4.97923	0.0150338	0.362574	RNA-binding KH domain-containing protein
AT3G09260	-0.50781	10.8536	0.0146868	0.362574	Glycosyl hydrolase superfamily protein
AT3G24430	0.433724	6.62233	0.0150919	0.362574	ATP binding
AT3G41979	0.799921	4.19032	0.0151923	0.362574	rRNA
AT3G45730	-1.17949	2.98945	0.0153223	0.362574
AT3G59430	-0.679003	2.44557	0.0152835	0.362574
AT4G13400	-0.995338	1.63903	0.0147749	0.362574	2-oxoglutarate (2OG) and Fe(II)-dependent oxygenase superfamily protein
AT4G15770	-0.52479	4.25324	0.015109	0.362574	RNA binding
AT4G22380	-0.681468	2.22296	0.0147537	0.362574	Ribosomal protein L7Ae/L30e/S12e/Gadd45 family protein
AT4G29870	-0.522595	4.52181	0.0152375	0.362574	Oligosaccharyltransferase complex/magnesium transporter family protein
AT4G31050	0.690157	2.32429	0.0148544	0.362574	Biotin/lipoate A/B protein ligase family
AT4G32230	-0.672472	2.15549	0.0146032	0.362574
AT4G34370	0.48128	4.34399	0.0151053	0.362574	RING/U-box superfamily protein
AT4G36040	-0.742943	7.70912	0.0151853	0.362574	Chaperone DnaJ-domain superfamily protein
AT5G08370	-0.770779	2.51514	0.0149895	0.362574	alpha-galactosidase 2
AT5G11340	-0.439289	4.76832	0.0147621	0.362574	Acyl-CoA N-acyltransferases (NAT) superfamily protein
AT5G13860	-0.637413	2.51315	0.0147682	0.362574	ELCH-like
AT5G20500	-0.41015	5.00215	0.0148276	0.362574	Glutaredoxin family protein
AT5G23220	-0.76601	2.012	0.0153502	0.362574	nicotinamidase 3
AT1G63690	0.376114	5.85983	0.0154688	0.364358	SIGNAL PEPTIDE PEPTIDASE-LIKE 2
AT5G24760	-0.514663	3.42508	0.0154606	0.364358	GroES-like zinc-binding dehydrogenase family protein
AT1G06710	0.830777	2.04362	0.015527	0.364416	Tetratricopeptide repeat (TPR)-like superfamily protein
AT2G13290	-0.537506	4.21862	0.0155576	0.364416	beta-1,4-N-acetylglucosaminyltransferase family protein
AT3G44100	-0.400051	4.84962	0.0155941	0.364416	MD-2-related lipid recognition domain-containing protein
AT5G09440	-0.691889	5.3834	0.0155644	0.364416	EXORDIUM like 4
AT5G11860	-0.501777	3.72888	0.0156006	0.364416	SCP1-like small phosphatase 5
AT5G23580	0.54451	3.41416	0.0155968	0.364416	calmodulin-like domain protein kinase 9
AT3G52200	0.46452	5.26423	0.0156394	0.364718	Dihydrolipoamide acetyltransferase, long form protein
AT4G39235	-0.659423	3.99246	0.0156566	0.364718
AT3G01510	0.487267	4.37099	0.0157775	0.367027	like SEX4 1
AT1G12260	0.956429	0.958783	0.0158789	0.367536	NAC 007
AT2G31190	0.495142	3.45174	0.015859	0.367536	Protein of unknown function, DUF647
AT2G36060	-0.401014	5.64418	0.0159395	0.367536	MMS ZWEI homologue 3
AT3G09050	-0.51949	4.67061	0.0159448	0.367536
AT3G15620	0.728234	2.74304	0.0158905	0.367536	DNA photolyase family protein
AT3G19660	-0.873921	1.71413	0.015879	0.367536
AT3G53630	-0.454245	4.42383	0.0159515	0.367536
AT3G25220	-0.458322	5.44073	0.0159892	0.367903	FK506-binding protein 15 kD-1
AT5G57560	-0.897255	8.54338	0.0160243	0.36821	Xyloglucan endotransglucosylase/hydrolase family protein
AT2G33590	-0.450692	6.12715	0.0160874	0.369159	NAD(P)-binding Rossmann-fold superfamily protein
AT3G05100	-0.440804	4.09849	0.0161671	0.369983	S-adenosyl-L-methionine-dependent methyltransferases superfamily protein
AT5G39710	0.619851	2.44033	0.0161488	0.369983	Tetratricopeptide repeat (TPR)-like superfamily protein
AT1G05136	-0.881649	1.67023	0.0161995	0.370223
AT1G01830	0.457594	3.60149	0.0163398	0.370881	ARM repeat superfamily protein
AT1G27930	-0.4261	4.39127	0.016294	0.370881	Protein of unknown function (DUF579)
AT2G04630	-0.455898	4.43545	0.0163413	0.370881	RNA polymerase Rpb6
AT3G05345	-0.629981	3.05066	0.0163362	0.370881	Chaperone DnaJ-domain superfamily protein
AT4G26710	-0.466257	6.57617	0.0163598	0.370881	ATPase, V0 complex, subunit E
AT5G51430	0.439935	4.24627	0.0162676	0.370881	conserved oligomeric Golgi complex component-related / COG complex component-related
AT1G34110	-0.422539	4.70551	0.0163927	0.37113	Leucine-rich receptor-like protein kinase family protein
AT2G40200	-1.15537	0.231044	0.0164765	0.372528	basic helix-loop-helix (bHLH) DNA-binding superfamily protein
AT1G13380	-0.495192	4.58554	0.0173237	0.375133	Protein of unknown function (DUF1218)
AT1G21900	-0.383581	5.27792	0.0170241	0.375133	emp24/gp25L/p24 family/GOLD family protein
AT1G23980	0.693551	1.85092	0.0170868	0.375133	RING/U-box superfamily protein
AT1G26880	-0.436482	6.15726	0.0172042	0.375133	Ribosomal protein L34e superfamily protein
AT1G29370	-0.425252	4.19217	0.0167896	0.375133	Kinase-related protein of unknown function (DUF1296)
AT1G33410	0.459418	4.98346	0.0171612	0.375133	SUPPRESSOR OF AUXIN RESISTANCE1
AT1G47580	-0.554629	4.31414	0.0169676	0.375133	Pentatricopeptide repeat (PPR) superfamily protein
AT1G80490	0.426645	4.84126	0.0168122	0.375133	TOPLESS-related 1
AT2G23780	-0.42902	4.16119	0.0167151	0.375133	RING/U-box superfamily protein
AT2G23940	-0.480881	3.52405	0.0172715	0.375133	Protein of unknown function (DUF788)
AT2G33710	-0.866538	2.27849	0.0169806	0.375133	Integrase-type DNA-binding superfamily protein
AT2G41100	-1.65211	7.41332	0.0169846	0.375133	Calcium-binding EF hand family protein
AT2G41780	-0.957093	1.46512	0.0168901	0.375133
AT2G42900	-0.69404	2.6051	0.0171636	0.375133	Plant basic secretory protein (BSP) family protein
AT3G04090	-0.394394	6.21435	0.0169346	0.375133	small and basic intrinsic protein 1A
AT3G14120	0.432342	4.23016	0.016907	0.375133
AT3G45050	-0.578156	4.23978	0.0166512	0.375133
AT3G54900	-0.4948	7.08867	0.0172861	0.375133	CAX interacting protein 1
AT3G55480	0.419038	4.28961	0.0171823	0.375133	protein affected traf&
AT4G10480	-0.453785	7.05824	0.0171463	0.375133	Nascent polypeptide-associated complex (NAC), alpha subunit family protein
AT4G19985	-0.495504	4.4206	0.016754	0.375133	Acyl-CoA N-acyltransferases (NAT) superfamily protein
AT4G27180	0.41789	4.78011	0.0170631	0.375133	kinesin 2
AT4G31115	-0.466728	4.08229	0.0172877	0.375133	Protein of unknown function (DUF1997)
AT5G06660	-0.621518	3.39471	0.0170174	0.375133	Protein of unknown function DUF106, transmembrane
AT5G08410	-0.462418	6.25875	0.0173102	0.375133	ferredoxin/thioredoxin reductase subunit A (variable subunit) 2
AT5G10690	-0.447917	5.82956	0.0171832	0.375133	pentatricopeptide (PPR) repeat-containing protein / CBS domain-containing protein
AT5G11770	-0.411916	7.15199	0.0167332	0.375133	NADH-ubiquinone oxidoreductase 20 kDa subunit, mitochondrial
AT5G16715	0.437141	5.94423	0.0167864	0.375133	ATP binding;valine-tRNA ligases;aminoacyl-tRNA ligases;nucleotide binding;ATP binding;aminoacyl-tRNA ligases
AT5G18110	-0.370788	5.14998	0.0172815	0.375133	novel cap-binding protein
AT5G47640	-0.404187	5.12736	0.0169519	0.375133	nuclear factor Y, subunit B2
AT5G48590	-0.446048	4.73007	0.0168319	0.375133	Protein of unknown function (DUF760)
AT5G58240	-0.570029	3.46241	0.0168281	0.375133	FRAGILE HISTIDINE TRIAD
AT5G67590	-0.41703	4.68651	0.0170426	0.375133	NADH-ubiquinone oxidoreductase-related
AT1G55020	0.386598	5.85313	0.0173543	0.375315	lipoxygenase 1
AT1G10290	0.363659	6.10248	0.0174507	0.375892	dynamin-like protein 6
AT1G61580	-0.513972	5.42242	0.017435	0.375892	R-protein L3 B
AT2G26975	-0.583777	4.08925	0.0174699	0.375892	Ctr copper transporter family
AT5G67510	-0.516403	5.61258	0.0174609	0.375892	Translation protein SH3-like family protein
AT1G27970	-0.375583	5.69326	0.0176001	0.377561	nuclear transport factor 2B
AT3G09320	-0.453879	3.77581	0.0176144	0.377561	DHHC-type zinc finger family protein
AT5G03460	-0.459244	4.4782	0.0175815	0.377561
AT1G56000	-0.519781	3.09643	0.0176674	0.378054	FAD/NAD(P)-binding oxidoreductase family protein
AT5G10410	0.775758	1.59857	0.0177045	0.378054	ENTH/ANTH/VHS superfamily protein
AT5G50460	-0.45945	4.86602	0.0176976	0.378054	secE/sec61-gamma protein transport protein
AT1G78890	-0.432988	4.22108	0.0177772	0.379127
AT3G07910	-0.471201	3.98163	0.0178112	0.379374
AT1G06000	-0.712093	2.29266	0.0180874	0.380939	UDP-Glycosyltransferase superfamily protein
AT1G26770	-0.518154	4.49328	0.0180595	0.380939	expansin A10
AT2G02860	-0.503839	3.73329	0.0179152	0.380939	sucrose transporter 2
AT2G44010	-0.795971	1.57697	0.0180124	0.380939
AT3G11110	-0.802856	3.41086	0.0179888	0.380939	RING/U-box superfamily protein
AT3G16450	-0.415375	8.7333	0.0180213	0.380939	Mannose-binding lectin superfamily protein
AT3G51100	-0.442397	3.77988	0.0180719	0.380939
AT4G10760	0.429125	4.31042	0.0179909	0.380939	mRNAadenosine methylase
AT5G01180	-0.580905	2.42249	0.0180457	0.380939	peptide transporter 5
AT5G64580	0.405596	6.02527	0.0181314	0.38139	AAA-type ATPase family protein
AT2G17972	-0.731031	6.30112	0.0181923	0.382034
AT4G00300	-0.605205	5.99627	0.0182072	0.382034	fringe-related protein
AT5G13430	-0.414395	5.44738	0.018253	0.382522	Ubiquinol-cytochrome C reductase iron-sulfur subunit
AT2G27510	-0.627943	4.84817	0.0183754	0.384197	ferredoxin 3
AT3G62930	-0.708531	2.95819	0.0184053	0.384197	Thioredoxin superfamily protein
AT4G19140	-0.604485	3.30865	0.0183853	0.384197
AT5G54500	-0.44701	6.74196	0.0184238	0.384197	flavodoxin-like quinone reductase 1
AT3G58800	0.83321	1.86672	0.0184702	0.384217
AT5G24620	0.675362	4.30559	0.018459	0.384217	Pathogenesis-related thaumatin superfamily protein
AT1G29670	-0.500796	7.4524	0.0184957	0.384274	GDSL-like Lipase/Acylhydrolase superfamily protein
AT2G39880	-0.848206	1.57803	0.01853	0.384348	myb domain protein 25
AT4G03010	-0.713717	1.96886	0.0185447	0.384348	RNI-like superfamily protein
AT2G23340	-0.518535	4.35618	0.0185806	0.384589	DREB and EAR motif protein 3
AT4G36960	0.384166	5.16182	0.0186018	0.384589	RNA-binding (RRM/RBD/RNP motifs) family protein
AT1G33110	0.57947	5.41104	0.0186656	0.384967	MATE efflux family protein
AT2G44730	-0.549096	3.93983	0.0186543	0.384967	Alcohol dehydrogenase transcription factor Myb/SANT-like family protein
AT3G44120	-0.734258	3.11794	0.0189035	0.389398	F-box and associated interaction domains-containing protein
AT2G05220	-0.381684	5.89663	0.0189872	0.390646	Ribosomal S17 family protein
AT4G18370	0.437588	5.09112	0.0190933	0.3914	DEGP protease 5
AT5G58650	-0.791116	3.89819	0.019074	0.3914	plant peptide containing sulfated tyrosine 1
AT5G65650	-0.562802	3.01158	0.0190488	0.3914	Protein of unknown function (DUF1195)
AT3G02350	-0.379173	5.50669	0.0191739	0.391815	galacturonosyltransferase 9
AT3G02515	-0.726485	2.84684	0.019183	0.391815	transposable element gene
AT3G21055	-0.675169	10.6974	0.0191478	0.391815	photosystem II subunit T
AT1G21550	-0.907567	3.99315	0.019282	0.391944	Calcium-binding EF-hand family protein
AT1G26270	-0.47042	5.6113	0.0192785	0.391944	Phosphatidylinositol 3- and 4-kinase family protein
AT2G17790	0.370204	4.64441	0.019228	0.391944	VPS35 homolog A
AT2G28070	0.53231	3.46394	0.019264	0.391944	ABC-2 type transporter family protein
AT1G27400	-0.468023	6.40431	0.0193758	0.392906	Ribosomal protein L22p/L17e family protein
AT5G61170	-0.453055	5.93991	0.0193731	0.392906	Ribosomal protein S19e family protein
AT4G15930	-0.492479	4.68272	0.019423	0.393391	Dynein light chain type 1 family protein
AT2G16880	0.535289	3.35828	0.0194857	0.394189	Pentatricopeptide repeat (PPR) superfamily protein
AT2G20290	0.525271	3.65827	0.0195649	0.395319	myosin-like protein XIG
AT5G15540	0.460787	4.49487	0.0196281	0.396123	PHD finger family protein
AT3G54910	-0.676684	2.35878	0.0196755	0.396606	RNI-like superfamily protein
AT1G05430	0.43568	4.27131	0.0198196	0.397614
AT1G79245	1.2716	7.44599	0.0198047	0.397614
AT5G17390	0.786399	1.52494	0.0197944	0.397614	Adenine nucleotide alpha hydrolases-like superfamily protein
AT5G66790	-1.03608	1.86286	0.0197919	0.397614	Protein kinase superfamily protein
AT1G17080	-0.486021	4.77123	0.0201053	0.398332	Ribosomal protein L18ae family
AT1G18210	-0.778624	3.99445	0.0200454	0.398332	Calcium-binding EF-hand family protein
AT1G27435	-0.491099	4.04305	0.0201145	0.398332
AT1G29920	-0.489608	11.9649	0.0200015	0.398332	chlorophyll A/B-binding protein 2
AT2G41740	0.352139	6.10778	0.0199251	0.398332	villin 2
AT3G03990	-0.471978	5.18787	0.0200395	0.398332	alpha/beta-Hydrolases superfamily protein
AT3G06590	-0.53089	4.02836	0.0200687	0.398332	basic helix-loop-helix (bHLH) DNA-binding superfamily protein
AT3G13330	0.435393	5.18647	0.0199459	0.398332	proteasome activating protein 200
AT4G04020	0.525968	7.70117	0.0199137	0.398332	fibrillin
AT4G13520	-0.56777	5.65646	0.0199766	0.398332	small acidic protein 1
AT5G18790	-0.802741	1.5792	0.0200207	0.398332	Ribosomal protein L33 family protein
AT3G43240	0.404172	4.36687	0.0201388	0.398348	ARID/BRIGHT DNA-binding domain-containing protein
AT1G02780	-0.409306	8.06149	0.0206422	0.399112	Ribosomal protein L19e family protein
AT1G20225	-0.42531	5.8883	0.0206117	0.399112	Thioredoxin superfamily protein
AT1G63530	0.818972	2.25759	0.0205643	0.399112
AT1G69900	-0.498365	5.08066	0.0203837	0.399112	Actin cross-linking protein
AT1G71696	-0.532367	3.48609	0.0204139	0.399112	carboxypeptidase D, putative
AT1G78476	-1.22262	0.803417	0.0204203	0.399112
AT2G07689	0.552092	3.92473	0.0204667	0.399112	NADH-Ubiquinone/plastoquinone (complex I) protein
AT2G22850	-0.774141	2.03574	0.0204156	0.399112	basic leucine-zipper 6
AT2G37600	-0.50847	4.43161	0.0204781	0.399112	Ribosomal protein L36e family protein
AT2G40570	0.540589	3.76189	0.0205976	0.399112	initiator tRNA phosphoribosyl transferase family protein
AT2G43070	0.413685	4.1325	0.0202596	0.399112	SIGNAL PEPTIDE PEPTIDASE-LIKE 3
AT2G45990	-0.43395	4.80643	0.0204586	0.399112
AT2G47730	-0.437776	8.70187	0.0204271	0.399112	glutathione S-transferase phi 8
AT3G06540	0.470649	3.91556	0.0203036	0.399112	Rab escort protein
AT3G23900	0.37204	5.18728	0.0205299	0.399112	RNA recognition motif (RRM)-containing protein
AT4G29905	-0.466682	6.64705	0.0206494	0.399112
AT4G32000	0.879273	1.73415	0.0202986	0.399112	Protein kinase superfamily protein
AT5G35700	0.411804	4.40881	0.0206287	0.399112	fimbrin-like protein 2
AT5G47700	-0.442406	7.04039	0.020594	0.399112	60S acidic ribosomal protein family
AT5G64610	0.38899	4.31424	0.0204774	0.399112	histone acetyltransferase of the MYST family 1
AT1G71740	-1.04332	0.87554	0.0207235	0.399148
AT2G04520	-0.434047	6.79158	0.0207578	0.399148	Nucleic acid-binding, OB-fold-like protein
AT2G05510	0.647547	9.03601	0.0207411	0.399148	Glycine-rich protein family
AT2G27960	-0.429652	4.44211	0.0207693	0.399148	cyclin-dependent kinase-subunit 1
AT5G47820	0.36532	5.53879	0.0207451	0.399148	P-loop containing nucleoside triphosphate hydrolases superfamily protein
AT1G29630	0.715203	2.50881	0.020806	0.3994	5'-3' exonuclease family protein
AT3G13180	0.432975	4.27052	0.020883	0.400023	NOL1/NOP2/sun family protein / antitermination NusB domain-containing protein
AT4G09000	-0.37719	8.17436	0.0208858	0.400023	general regulatory factor 1
AT2G41790	0.389188	6.18535	0.0209397	0.40007	Insulinase (Peptidase family M16) family protein
AT3G03150	-0.528407	6.79236	0.0209592	0.40007
AT5G17610	-0.466963	3.63033	0.0209298	0.40007
AT1G45145	-0.576881	4.89165	0.0209997	0.400217	thioredoxin H-type 5
AT2G37195	-0.831047	1.17844	0.0210968	0.400217
AT3G13920	-0.426058	8.16613	0.0210687	0.400217	eukaryotic translation initiation factor 4A1
AT3G16950	-0.377189	5.3578	0.0211128	0.400217	lipoamide dehydrogenase 1
AT3G21300	0.473962	3.88498	0.0210489	0.400217	RNA methyltransferase family protein
AT4G25450	0.451427	5.01128	0.0210346	0.400217	non-intrinsic ABC protein 8
AT5G47680	-0.412265	4.72482	0.0211325	0.400217
AT3G16570	-0.506719	5.72412	0.021207	0.401177	rapid alkalinization factor 23
AT1G76320	0.549232	3.19586	0.0213297	0.40196	FAR1-related sequence 4
AT2G40316	-0.48862	3.6408	0.0213091	0.40196
AT4G34660	0.365127	4.80801	0.0213434	0.40196	SH3 domain-containing protein
AT4G38220	-0.382633	6.30619	0.0213062	0.40196	Peptidase M20/M25/M40 family protein
AT1G09010	0.343776	5.95417	0.0215923	0.402243	glycoside hydrolase family 2 protein
AT1G11755	-0.557693	2.5973	0.0215762	0.402243	Undecaprenyl pyrophosphate synthetase family protein
AT1G27050	-0.567344	2.42251	0.0215223	0.402243	homeobox protein 54
AT1G74450	-0.932189	3.83382	0.0214985	0.402243	Protein of unknown function (DUF793)
AT3G15356	-1.25453	4.59319	0.0214312	0.402243	Legume lectin family protein
AT3G52180	0.498767	4.56682	0.0215004	0.402243	dual specificity protein phosphatase (DsPTP1) family protein
AT4G09890	-0.484798	3.78753	0.0215449	0.402243	Protein of unknown function (DUF3511)
AT4G38890	0.377781	5.08614	0.0215847	0.402243	FMN-linked oxidoreductases superfamily protein
AT5G10380	-0.876626	3.02496	0.02141	0.402243	RING/U-box superfamily protein
AT5G63150	-0.586236	3.05977	0.0215963	0.402243
AT1G05350	0.473461	3.48485	0.0216665	0.402538	NAD(P)-binding Rossmann-fold superfamily protein
AT1G79450	0.699588	2.62022	0.0216914	0.402538	ALA-interacting subunit 5
AT3G05210	0.476756	3.65891	0.0217073	0.402538	nucleotide repair protein, putative
AT3G09085	-0.869611	1.46571	0.0216501	0.402538	Protein of unknown function (DUF962)
AT5G44785	0.435069	5.16428	0.021753	0.402944	organellar single-stranded DNA binding protein 3
AT3G07760	-0.433734	4.05362	0.021777	0.402946	Sterile alpha motif (SAM) domain-containing protein
AT2G31360	-0.38915	7.06242	0.0218122	0.403156	16:0delta9 desaturase 2
AT1G22450	-0.479484	5.27997	0.0218964	0.403831	cytochrome C oxidase 6B
AT4G28050	-0.579857	3.84891	0.0218929	0.403831	tetraspanin7
AT2G31585	-0.631985	2.01214	0.0219654	0.403964	other RNA
AT3G28200	-0.385339	6.42703	0.0219754	0.403964	Peroxidase superfamily protein
AT5G56220	-0.5512	3.22356	0.0219647	0.403964	P-loop containing nucleoside triphosphate hydrolases superfamily protein
AT1G52600	-0.427741	5.24025	0.0222263	0.404481	Peptidase S24/S26A/S26B/S26C family protein
AT1G69910	-0.796639	3.49305	0.0222403	0.404481	Protein kinase superfamily protein
AT2G03440	-0.469189	7.77517	0.022393	0.404481	nodulin-related protein 1
AT2G25170	0.350264	6.18636	0.0221249	0.404481	chromatin remodeling factor CHD3 (PICKLE)
AT2G33370	-0.379878	6.06348	0.0224951	0.404481	Ribosomal protein L14p/L23e family protein
AT2G37520	0.486231	4.43996	0.0224518	0.404481	Acyl-CoA N-acyltransferase with RING/FYVE/PHD-type zinc finger domain
AT3G07100	0.403962	6.57751	0.0220883	0.404481	Sec23/Sec24 protein transport family protein
AT3G27360	-0.786033	2.43407	0.02242	0.404481	Histone superfamily protein
AT3G50690	-0.37104	5.81136	0.0221502	0.404481	Leucine-rich repeat (LRR) family protein
AT3G54200	-0.614939	4.56059	0.0223179	0.404481	Late embryogenesis abundant (LEA) hydroxyproline-rich glycoprotein family
AT3G62080	0.626591	2.43178	0.0222529	0.404481	SNF7 family protein
AT4G01270	0.677616	3.71181	0.0220677	0.404481	RING/U-box superfamily protein
AT4G02890	-0.411905	7.96596	0.0221827	0.404481	Ubiquitin family protein
AT4G21410	0.610667	3.87651	0.0224099	0.404481	cysteine-rich RLK (RECEPTOR-like protein kinase) 29
AT4G23420	0.684142	2.22259	0.0223336	0.404481	NAD(P)-binding Rossmann-fold superfamily protein
AT5G16810	0.439967	4.47743	0.0224757	0.404481	Protein kinase superfamily protein
AT5G42000	-0.581666	4.2186	0.0221877	0.404481	ORMDL family protein
AT5G42540	0.365107	5.50931	0.022464	0.404481	exoribonuclease 2
AT5G42720	0.528713	3.47218	0.0221794	0.404481	Glycosyl hydrolase family 17 protein
AT5G54390	0.417175	6.239	0.0225057	0.404481	HAL2-like
AT5G64010	0.873293	1.53177	0.0222909	0.404481
AT4G30650	-1.02207	2.17485	0.0225813	0.405409	Low temperature and salt responsive protein family
AT1G17860	-0.609079	5.76541	0.0226992	0.405957	Kunitz family trypsin and protease inhibitor protein
AT1G54140	-0.498242	3.5704	0.0227299	0.405957	TATA binding protein associated factor 21kDa subunit
AT3G18870	-0.78828	2.65573	0.0227103	0.405957	Mitochondrial transcription termination factor family protein
AT3G56690	0.507525	3.52014	0.0227997	0.405957	Cam interacting protein 111
AT4G14385	-0.666471	1.9891	0.0226393	0.405957
AT4G34750	-0.895336	1.79142	0.0228039	0.405957	SAUR-like auxin-responsive protein family
AT5G02310	0.375749	5.46391	0.0227662	0.405957	proteolysis 6
AT5G44230	-0.572774	2.57227	0.0227383	0.405957	Pentatricopeptide repeat (PPR) superfamily protein
AT5G08510	-0.658776	2.27264	0.0228647	0.406611	Pentatricopeptide repeat (PPR) superfamily protein
AT1G51840	0.819943	2.37068	0.0229801	0.406953	protein kinase-related
AT2G29700	-0.487848	4.36057	0.0229409	0.406953	pleckstrin homologue 1
AT3G59540	-0.409389	6.56332	0.0229482	0.406953	Ribosomal L38e protein family
AT4G12610	0.35236	5.29715	0.0229583	0.406953	transcription activators;DNA binding;RNA polymerase II transcription factors;catalytics;transcription initiation factors
AT1G71040	-0.44361	5.99718	0.0230297	0.407404	Cupredoxin superfamily protein
AT1G03870	-0.569778	8.58822	0.0230732	0.407746	FASCICLIN-like arabinoogalactan 9
AT4G23750	-0.471982	4.62088	0.0231182	0.408117	cytokinin response factor 2
AT5G59910	-0.459517	6.19849	0.0231463	0.408185	Histone superfamily protein
AT4G14890	-0.505775	6.37501	0.0232119	0.408915	2Fe-2S ferredoxin-like superfamily protein
AT1G76955	-0.722304	3.71573	0.0233097	0.410213	Expressed protein
AT1G74270	-0.39096	5.80273	0.0233501	0.410354	Ribosomal protein L35Ae family protein
AT4G12240	-0.696057	2.58664	0.0233663	0.410354	zinc finger (C2H2 type) family protein
AT4G14145	-0.546903	2.42755	0.0234567	0.411513
AT1G76100	-0.458745	6.36892	0.0235352	0.41161	plastocyanin 1
AT3G19360	-0.752216	1.6252	0.0235225	0.41161	Zinc finger (CCCH-type) family protein
AT3G48140	-0.393721	7.97437	0.0235326	0.41161	B12D protein
AT3G21870	-0.525384	3.7904	0.0235823	0.412008	cyclin p2;1
AT1G10865	-0.446238	4.26535	0.0236209	0.412256
AT2G17540	-0.483536	3.5948	0.0236667	0.412521
AT2G33430	-0.383474	6.59244	0.0236848	0.412521	differentiation and greening-like 1
AT1G34150	0.5739	2.96917	0.0238357	0.414207	Pseudouridine synthase family protein
AT3G14560	-0.519358	3.388	0.0239041	0.414207
AT3G27700	-0.450878	4.57053	0.0238706	0.414207	zinc finger (CCCH-type) family protein / RNA recognition motif (RRM)-containing protein
AT3G61580	-0.403979	8.26433	0.0238955	0.414207	Fatty acid/sphingolipid desaturase
AT5G22780	0.379464	4.53535	0.0238721	0.414207	Adaptor protein complex AP-2, alpha subunit
AT3G11090	-0.673949	3.19637	0.0239891	0.414829	LOB domain-containing protein 21
AT3G50550	-0.560292	2.84687	0.0239682	0.414829
AT5G19750	0.386217	5.35785	0.0240217	0.414969	Peroxisomal membrane 22 kDa (Mpv17/PMP22) family protein
AT1G33520	-0.373855	5.52389	0.024131	0.416433	D111/G-patch domain-containing protein
AT1G02500	-0.389128	8.65422	0.024246	0.416798	S-adenosylmethionine synthetase 1
AT3G14310	-0.453478	6.70289	0.0241923	0.416798	pectin methylesterase 3
AT3G57300	0.394161	5.39834	0.0242131	0.416798	INO80 ortholog
AT4G39200	-0.382534	7.74756	0.0242508	0.416798	Ribosomal protein S25 family protein
AT1G64850	-0.464271	4.84641	0.0243299	0.41731	Calcium-binding EF hand family protein
AT4G24275	-0.838442	1.44839	0.0243288	0.41731
AT2G22800	0.504035	3.438	0.024409	0.417486	Homeobox-leucine zipper protein family
AT4G23170	-0.688564	2.74496	0.0244142	0.417486	receptor-like protein kinase-related family protein
AT4G35510	-0.499738	3.30197	0.0244082	0.417486
AT1G03780	0.444246	4.46572	0.0246974	0.417972	targeting protein for XKLP2
AT1G31480	0.551984	3.02945	0.0244712	0.417972	shoot gravitropism 2 (SGR2)
AT1G31800	0.405781	6.93702	0.0246971	0.417972	cytochrome P450, family 97, subfamily A, polypeptide 3
AT1G34430	-0.364407	6.63198	0.0248465	0.417972	2-oxoacid dehydrogenases acyltransferase family protein
AT1G54575	-0.641174	3.53616	0.0247348	0.417972
AT2G22240	-0.399315	5.20147	0.0245906	0.417972	myo-inositol-1-phosphate synthase 2
AT2G37190	-0.518953	6.77228	0.024846	0.417972	Ribosomal protein L11 family protein
AT3G11650	-0.810994	3.55596	0.0247958	0.417972	NDR1/HIN1-like 2
AT3G52230	-0.432743	7.55203	0.0247803	0.417972
AT3G55040	0.390459	5.67425	0.0247461	0.417972	glutathione transferase lambda 2
AT4G02370	-0.379332	4.43007	0.0248628	0.417972	Protein of unknown function, DUF538
AT4G16720	-0.392324	7.52852	0.0245627	0.417972	Ribosomal protein L23/L15e family protein
AT4G39970	0.437013	6.73349	0.0247163	0.417972	Haloacid dehalogenase-like hydrolase (HAD) superfamily protein
AT5G09270	-0.782221	1.76483	0.0245717	0.417972
AT5G16830	-0.466122	3.96556	0.0246765	0.417972	syntaxin of plants 21
AT5G51850	0.772082	2.08774	0.0247888	0.417972
AT5G63500	-0.593943	4.24224	0.0247715	0.417972	Protein of unknown function (DUF 3339)
AT2G33210	0.400102	5.51586	0.0248911	0.418032	heat shock protein 60-2
AT4G00585	-0.405049	4.61229	0.0249655	0.418036
AT4G28950	0.931612	0.945581	0.0249589	0.418036	RHO-related protein from plants 9
AT5G45590	-0.488537	3.55772	0.0249562	0.418036	Ribosomal protein L35
AT3G43920	0.673884	2.23223	0.0250595	0.418591	dicer-like 3
AT3G54790	0.400209	4.33397	0.0250729	0.418591	ARM repeat superfamily protein
AT5G14170	0.391154	5.72131	0.0250334	0.418591	SWIB/MDM2 domain superfamily protein
AT5G23680	-0.416572	4.48677	0.0251675	0.419756	Sterile alpha motif (SAM) domain-containing protein
AT2G25010	0.52968	2.92366	0.0252263	0.419908	Aminotransferase-like, plant mobile domain family protein
AT4G29220	0.366918	6.1731	0.0252183	0.419908	phosphofructokinase 1
AT2G39010	-0.499814	8.69385	0.0252837	0.420364	plasma membrane intrinsic protein 2E
AT5G55140	-0.395499	4.53585	0.0253033	0.420364	ribosomal protein L30 family protein
AT2G21210	-0.735668	5.0924	0.0253732	0.421111	SAUR-like auxin-responsive protein family
AT3G47620	-0.415187	6.46445	0.0254495	0.421869	TEOSINTE BRANCHED, cycloidea and PCF (TCP) 14
AT4G34600	-0.572701	3.09614	0.0254688	0.421869
AT1G63840	-0.562215	3.88228	0.0256487	0.422367	RING/U-box superfamily protein
AT2G43750	0.366392	6.86372	0.0255964	0.422367	O-acetylserine (thiol) lyase B
AT3G43270	-0.45788	4.36657	0.0256294	0.422367	Plant invertase/pectin methylesterase inhibitor superfamily
AT4G18030	-0.398767	6.68133	0.0256212	0.422367	S-adenosyl-L-methionine-dependent methyltransferases superfamily protein
AT5G17770	-0.347843	6.19153	0.0256405	0.422367	NADH:cytochrome B5 reductase 1
AT5G47930	-0.475876	5.73629	0.0256428	0.422367	Zinc-binding ribosomal protein family protein
AT1G15010	-1.44117	1.98175	0.0257214	0.422741
AT4G21900	-0.542697	2.69684	0.0257118	0.422741	proteinaceous RNase P 3
AT1G11200	-0.498545	2.89062	0.025787	0.423407	Protein of unknown function (DUF300)
AT2G01760	0.704047	2.52653	0.0258436	0.423514	response regulator 14
AT2G22090	0.478312	3.95777	0.0258284	0.423514	RNA-binding (RRM/RBD/RNP motifs) family protein
AT1G12290	0.770709	2.04241	0.0259323	0.424557	Disease resistance protein (CC-NBS-LRR class) family
AT2G34510	-0.48505	5.77963	0.0259834	0.424981	Protein of unknown function, DUF642
AT2G46540	-0.479403	4.6833	0.0260669	0.425516
AT2G47420	-0.385411	4.61568	0.0261418	0.425516	Ribosomal RNA adenine dimethylase family protein
AT3G17185	-0.432065	4.03135	0.0260812	0.425516	TAS3/TASIR-ARF (TRANS-ACTING SIRNA3); other RNA
AT4G19180	-0.396251	3.87914	0.0261333	0.425516	GDA1/CD39 nucleoside phosphatase family protein
AT5G24800	-0.518973	4.32911	0.0261051	0.425516	basic leucine zipper 9
AT4G03200	0.398087	5.4837	0.0262233	0.426431	catalytics
AT1G06550	-0.433126	4.62403	0.0262616	0.426644	ATP-dependent caseinolytic (Clp) protease/crotonase family protein
AT4G02080	-0.355534	6.07773	0.0263162	0.426733	secretion-associated RAS super family 2
AT4G02730	-0.760634	1.59889	0.0263176	0.426733	Transducin/WD40 repeat-like superfamily protein
AT1G29110	-1.05841	0.691195	0.0264029	0.427674	Cysteine proteinases superfamily protein
AT5G10270	0.419354	4.16608	0.0264306	0.427674	cyclin-dependent kinase C;1
AT5G18520	-0.37549	6.76599	0.0264515	0.427674	Lung seven transmembrane receptor family protein
AT1G10600	-0.439486	4.06812	0.0265348	0.428612	associated molecule with the SH3 domain of STAM 2
AT1G59980	-0.758247	1.7944	0.0268527	0.432499	ARG1-like 2
AT3G17050	-0.692293	4.73853	0.0268686	0.432499	transposable element gene
AT5G03120	-0.481735	5.03537	0.0268778	0.432499
AT5G48570	-0.713347	8.41101	0.0268481	0.432499	FKBP-type peptidyl-prolyl cis-trans isomerase family protein
AT3G03020	-0.724046	2.79039	0.0269639	0.433061
AT3G48570	-0.560932	4.14488	0.0269494	0.433061	secE/sec61-gamma protein transport protein
AT1G31760	-0.819838	0.970047	0.02704	0.433196	SWIB/MDM2 domain superfamily protein
AT1G50840	0.404017	5.8355	0.0270826	0.433196	polymerase gamma 2
AT1G73660	0.45238	6.31259	0.0271001	0.433196	protein tyrosine kinase family protein
AT2G04050	1.7013	1.66535	0.0270214	0.433196	MATE efflux family protein
AT3G48810	0.671099	1.59916	0.0271004	0.433196	Pentatricopeptide repeat (PPR) superfamily protein
AT1G50450	0.398724	5.80777	0.0271887	0.43409	Saccharopine dehydrogenase
AT4G01480	-0.606619	4.20605	0.0272076	0.43409	pyrophosphorylase 5
AT2G01540	-0.426848	4.06235	0.0272958	0.435087	Calcium-dependent lipid-binding (CaLB domain) family protein
AT5G48520	0.42242	3.61248	0.0274824	0.437649
AT1G61770	-0.381762	4.64373	0.0276183	0.437757	Chaperone DnaJ-domain superfamily protein
AT1G73100	0.454965	3.34946	0.0275941	0.437757	SU(VAR)3-9 homolog 3
AT3G09700	-0.562935	2.26598	0.0276187	0.437757	Chaperone DnaJ-domain superfamily protein
AT3G46030	-0.434021	6.07509	0.0275733	0.437757	Histone superfamily protein
AT4G16830	-0.350396	6.44098	0.0275886	0.437757	Hyaluronan / mRNA binding family
AT1G28395	-0.540571	2.61371	0.0277714	0.439354
AT4G10130	-0.618207	2.13791	0.0277501	0.439354	DNAJ heat shock N-terminal domain-containing protein
AT1G65845	-0.715498	5.1087	0.0278839	0.439681
AT1G72990	-0.530229	2.81861	0.0279215	0.439681	beta-galactosidase 17
AT2G44270	0.470647	3.6595	0.0278979	0.439681	repressor of lrx1
AT3G16290	0.388685	6.58002	0.0279097	0.439681	AAA-type ATPase family protein
AT5G14840	0.45942	3.52694	0.027922	0.439681
AT5G52545	-0.807163	1.66133	0.0281227	0.442428
AT1G03330	-0.398318	4.38435	0.0281533	0.442498	Small nuclear ribonucleoprotein family protein
AT3G22690	0.791562	1.38501	0.0282302	0.443185
AT3G58660	-0.411073	5.4186	0.0282494	0.443185	Ribosomal protein L1p/L10e family
AT1G17620	-0.48385	5.73532	0.0284184	0.44496	Late embryogenesis abundant (LEA) hydroxyproline-rich glycoprotein family
AT2G38870	-0.501645	5.68514	0.0284054	0.44496	Serine protease inhibitor, potato inhibitor I-type family protein
AT3G19720	0.384485	6.11367	0.0284415	0.44496	P-loop containing nucleoside triphosphate hydrolases superfamily protein
AT1G28540	-0.651186	2.29344	0.0284861	0.445247
AT2G01220	-0.424844	4.71917	0.0286932	0.446488	Nucleotidylyl transferase superfamily protein
AT2G18040	-0.509276	5.06119	0.0287449	0.446488	peptidylprolyl cis/trans isomerase, NIMA-interacting 1
AT3G12587	-0.633551	2.84595	0.0287409	0.446488	Oligosaccaryltransferase
AT4G09040	-0.372056	6.41879	0.0287512	0.446488	RNA-binding (RRM/RBD/RNP motifs) family protein
AT4G26830	0.749018	1.14422	0.0287767	0.446488	O-Glycosyl hydrolases family 17 protein
AT5G14320	-0.412584	8.20505	0.0287472	0.446488	Ribosomal protein S13/S18 family
AT5G26800	-0.556314	2.87571	0.02864	0.446488
AT5G58270	0.36775	5.66518	0.0285978	0.446488	ABC transporter of the mitochondrion 3
AT1G78830	-0.857594	7.55392	0.0288236	0.446667	Curculin-like (mannose-binding) lectin family protein
AT5G18900	-0.359591	4.52113	0.0288411	0.446667	2-oxoglutarate (2OG) and Fe(II)-dependent oxygenase superfamily protein
AT4G34290	-0.524868	6.22102	0.0289435	0.447207	SWIB/MDM2 domain superfamily protein
AT5G11450	0.369751	6.07383	0.0289553	0.447207	Mog1/PsbP/DUF1795-like photosystem II reaction center PsbP family protein
AT5G51620	-0.576176	2.89134	0.0289338	0.447207	Uncharacterised protein family (UPF0172)
AT1G03600	-0.484278	8.54124	0.0292025	0.447507	photosystem II family protein
AT2G04880	0.400337	4.77427	0.0291052	0.447507	zinc-dependent activator protein-1
AT2G44060	-0.375668	7.86197	0.0291911	0.447507	Late embryogenesis abundant protein, group 2
AT3G25740	0.570673	3.45609	0.0290346	0.447507	methionine aminopeptidase 1C
AT4G08950	-0.546949	8.60426	0.0291069	0.447507	Phosphate-responsive 1 family protein
AT5G13280	0.340893	5.32161	0.029062	0.447507	aspartate kinase 1
AT5G19330	0.317381	5.88081	0.0292048	0.447507	ARM repeat protein interacting with ABF2
AT5G53880	-0.587152	4.99475	0.0292129	0.447507
AT5G54940	-0.525455	7.55428	0.0291776	0.447507	Translation initiation factor SUI1 family protein
AT2G29970	0.363455	4.95737	0.0292793	0.447744	Double Clp-N motif-containing P-loop nucleoside triphosphate hydrolases superfamily protein
AT4G39170	0.439774	4.84198	0.0292813	0.447744	Sec14p-like phosphatidylinositol transfer family protein
AT1G19130	-0.4813	3.67506	0.0293246	0.448002
AT3G23805	-0.590403	3.35859	0.0294219	0.448677	ralf-like 24
AT4G27380	-0.396834	4.43837	0.0294134	0.448677
AT2G03680	-0.374817	6.64157	0.0294735	0.448938	spiral1
AT4G22980	-0.749189	1.54516	0.0294921	0.448938
AT4G00710	0.388053	5.22	0.0295481	0.449386	BR-signaling kinase 3
AT2G45300	0.361528	5.4	0.0296032	0.449415	RNA 3'-terminal phosphate cyclase/enolpyruvate transferase, alpha/beta
AT4G23760	-0.690924	2.69908	0.0295989	0.449415	Cox19-like CHCH family protein
AT2G39500	-0.65002	2.1199	0.0296629	0.44974
AT5G08150	-0.735387	2.72793	0.0296922	0.44974	suppressor of phytochrome b 5
AT5G24270	0.676358	1.48219	0.0297043	0.44974	Calcium-binding EF-hand family protein
AT1G57860	-0.392098	6.14885	0.029842	0.451017	Translation protein SH3-like family protein
AT1G66280	-0.527679	6.20925	0.0298396	0.451017	Glycosyl hydrolase superfamily protein
AT3G61110	-0.397183	7.45197	0.0300228	0.45294	ribosomal protein S27
AT5G63090	-0.836613	1.51383	0.0300206	0.45294	Lateral organ boundaries (LOB) domain family protein
AT2G27710	-0.481556	7.32052	0.0301405	0.454311	60S acidic ribosomal protein family
AT2G20910	0.696271	4.85876	0.0302519	0.455178
AT2G24395	-0.611237	3.01349	0.0302259	0.455178	chaperone protein dnaJ-related
AT1G05135	-0.663898	7.43098	0.030322	0.455372
AT1G76130	0.585956	3.44869	0.0303889	0.455372	alpha-amylase-like 2
AT3G48890	-0.361298	5.34194	0.0303698	0.455372	membrane-associated progesterone binding protein 3
AT5G35220	0.371458	6.15702	0.0303967	0.455372	Peptidase M50 family protein
AT5G64880	-0.623286	2.64667	0.0303994	0.455372
AT5G59970	-0.471059	4.39397	0.0304719	0.456054	Histone superfamily protein
AT1G08465	-0.434816	3.94785	0.0305586	0.456503	Plant-specific transcription factor YABBY family protein
AT2G40880	-0.50852	5.61375	0.0305829	0.456503	cystatin A
AT5G07620	-0.843662	1.02902	0.0305382	0.456503	Protein kinase superfamily protein
AT2G39270	-0.524776	2.68546	0.0308102	0.45949	P-loop containing nucleoside triphosphate hydrolases superfamily protein
AT2G02148	0.546332	3.14365	0.0308612	0.459791
AT2G44900	0.472204	3.89033	0.0308848	0.459791	ARABIDILLO-1
AT4G21710	0.36296	5.28526	0.0310007	0.461112	DNA-directed RNA polymerase family protein
AT4G10750	-0.530408	3.90793	0.0310939	0.462091	Phosphoenolpyruvate carboxylase family protein
AT3G62400	-0.443143	4.91358	0.0313702	0.465788
AT1G33340	0.89426	1.25407	0.0315928	0.46784	ENTH/ANTH/VHS superfamily protein
AT1G61150	0.38187	4.14086	0.0315944	0.46784	LisH and RanBPM domains containing protein
AT2G26440	-0.429982	4.28355	0.0315928	0.46784	Plant invertase/pectin methylesterase inhibitor superfamily
AT3G13230	-0.387905	4.26555	0.0316743	0.46784	RNA-binding KH domain-containing protein
AT5G14430	-0.343886	5.73135	0.031651	0.46784	S-adenosyl-L-methionine-dependent methyltransferases superfamily protein
AT5G42680	-0.564296	2.30051	0.031674	0.46784	Protein of unknown function, DUF617
AT1G75630	-0.369275	4.99827	0.0319714	0.468347	vacuolar H+-pumping ATPase 16 kDa proteolipid subunit 4
AT2G19790	-0.397884	4.5859	0.031846	0.468347	SNARE-like superfamily protein
AT2G31040	0.412277	7.0832	0.0319016	0.468347	ATP synthase protein I -related
AT2G40400	0.396373	6.74476	0.0319856	0.468347	Protein of unknown function (DUF399 and DUF3411)
AT4G13260	0.792896	1.78908	0.0318465	0.468347	Flavin-binding monooxygenase family protein
AT4G33420	-0.587664	4.96306	0.03191	0.468347	Peroxidase superfamily protein
AT5G13950	-0.424323	6.08785	0.0318144	0.468347
AT5G20720	0.405605	8.63263	0.0317783	0.468347	chaperonin 20
AT5G41950	0.351479	4.84893	0.0319717	0.468347	Tetratricopeptide repeat (TPR)-like superfamily protein
AT5G60100	0.545274	3.68818	0.0319534	0.468347	pseudo-response regulator 3
AT1G15330	-1.14489	1.93607	0.0321235	0.469878	Cystathionine beta-synthase (CBS) protein
AT4G21790	-0.364442	6.74515	0.0321457	0.469878	tobamovirus multiplication 1
AT1G43690	0.337889	5.37714	0.0322805	0.47002	ubiquitin interaction motif-containing protein
AT1G58370	0.459065	3.51317	0.0323216	0.47002	glycosyl hydrolase family 10 protein / carbohydrate-binding domain-containing protein
AT2G39380	0.57525	2.36604	0.0321932	0.47002	exocyst subunit exo70 family protein H2
AT4G03635	-0.742771	2.33771	0.0323019	0.47002
AT4G14713	-0.664422	1.68476	0.0322216	0.47002	TIFY domain/Divergent CCT motif family protein
AT5G23440	-0.457935	4.48867	0.0323222	0.47002	ferredoxin/thioredoxin reductase subunit A (variable subunit) 1
AT3G10985	-0.540694	6.42061	0.0323632	0.470212	senescence associated gene 20
AT3G10720	-0.554921	6.95911	0.0324501	0.471069	Plant invertase/pectin methylesterase inhibitor superfamily
AT4G12250	-0.455609	3.33287	0.0325034	0.471439	UDP-D-glucuronate 4-epimerase 5
AT1G18880	0.429038	4.18337	0.0326645	0.472344	Major facilitator superfamily protein
AT1G63390	0.613127	2.3768	0.0326775	0.472344	FAD/NAD(P)-binding oxidoreductase family protein
AT2G21870	0.374383	7.85086	0.0326164	0.472344	copper ion binding;cobalt ion binding;zinc ion binding
AT2G32060	-0.493288	5.35584	0.0326228	0.472344	Ribosomal protein L7Ae/L30e/S12e/Gadd45 family protein
AT2G47680	-0.816909	1.42667	0.0327985	0.473283	zinc finger (CCCH type) helicase family protein
AT5G39080	-0.504737	5.74748	0.032789	0.473283	HXXXD-type acyl-transferase family protein
AT1G29950	0.819858	1.37064	0.0328736	0.473778	basic helix-loop-helix (bHLH) DNA-binding superfamily protein
AT2G01020	0.727507	3.71384	0.0329168	0.473778	rRNA
AT2G23760	-0.349726	5.49918	0.0328962	0.473778	BEL1-like homeodomain 4
AT4G08580	-0.428674	4.56508	0.0329735	0.47419	microfibrillar-associated protein-related
AT3G46220	0.401018	3.82669	0.0331484	0.475795
AT3G58850	-0.770777	2.77974	0.0331316	0.475795	phy rapidly regulated 2
AT4G27280	-1.18984	5.46702	0.0331695	0.475795	Calcium-binding EF-hand family protein
AT1G76760	0.665902	1.51628	0.0333646	0.476782	thioredoxin Y1
AT2G16440	0.513366	3.70973	0.0334212	0.476782	Minichromosome maintenance (MCM2/3/5) family protein
AT2G34710	0.491799	4.50257	0.0335202	0.476782	Homeobox-leucine zipper family protein / lipid-binding START domain-containing protein
AT3G27470	-0.621675	2.62513	0.0335143	0.476782	Protein of unknown function (DUF707)
AT3G28956	-0.733278	1.56567	0.0332717	0.476782	RNA polymerase II, Rpb4, core protein
AT3G45980	-0.429408	5.77222	0.0334703	0.476782	Histone superfamily protein
AT3G52430	-0.492485	3.73114	0.033405	0.476782	alpha/beta-Hydrolases superfamily protein
AT3G52748	-0.853953	1.11862	0.0334265	0.476782	other RNA
AT4G14600	-0.57687	1.91829	0.0333748	0.476782	Target SNARE coiled-coil domain protein
AT5G02610	-0.367596	5.3741	0.0335128	0.476782	Ribosomal L29 family protein
AT3G01090	0.36445	4.9003	0.0336399	0.477281	SNF1 kinase homolog 10
AT3G57060	0.564001	3.25138	0.0336002	0.477281	binding
AT5G56980	-0.339206	5.93539	0.033635	0.477281
AT1G13270	-0.35219	4.97708	0.033698	0.477499	methionine aminopeptidase 1B
AT1G76890	-0.546782	3.20558	0.0337608	0.477499	Duplicated homeodomain-like superfamily protein
AT2G29180	-0.383817	5.92367	0.0337682	0.477499
AT4G21470	0.434226	3.7607	0.0337286	0.477499	riboflavin kinase/FMN hydrolase
AT5G05710	-0.552614	3.53782	0.0338203	0.477836	Pleckstrin homology (PH) domain superfamily protein
AT1G23220	-0.481269	3.41022	0.0338557	0.477936	Dynein light chain type 1 family protein
AT1G69760	-0.481158	5.0595	0.034007	0.478939
AT1G73260	-0.699278	5.88381	0.034125	0.478939	kunitz trypsin inhibitor 1
AT1G77940	-0.376378	7.02147	0.0340393	0.478939	Ribosomal protein L7Ae/L30e/S12e/Gadd45 family protein
AT2G15830	-0.810798	1.87083	0.034092	0.478939
AT2G34780	-0.472826	3.60803	0.0340096	0.478939	maternal effect embryo arrest 22
AT4G19370	-0.840692	1.25596	0.0341022	0.478939	Protein of unknown function (DUF1218)
AT4G35440	0.44754	3.85241	0.0340406	0.478939	chloride channel E
AT3G05560	-0.431836	7.02216	0.0341845	0.479377	Ribosomal L22e protein family
AT1G62240	-0.876432	1.59176	0.0344278	0.479446
AT1G72650	0.389988	4.78901	0.0344153	0.479446	TRF-like 6
AT1G78460	-0.522351	3.4251	0.0342399	0.479446	SOUL heme-binding family protein
AT2G41410	-0.588587	4.70697	0.034343	0.479446	Calcium-binding EF-hand family protein
AT2G45530	-0.491153	3.30882	0.0344181	0.479446	RING/U-box superfamily protein
AT3G06430	-0.381168	4.75004	0.034407	0.479446	Tetratricopeptide repeat (TPR)-like superfamily protein
AT3G12260	-0.391694	6.01051	0.03443	0.479446	LYR family of Fe/S cluster biogenesis protein
AT5G13120	0.373339	7.08325	0.0344446	0.479446	cyclophilin 20-2
AT5G16320	-0.770917	1.20236	0.0343951	0.479446	FRIGIDA like 1
AT1G54630	-0.350553	6.10631	0.0344947	0.479748	acyl carrier protein 3
AT2G36490	0.425927	4.09087	0.0345616	0.47989	demeter-like 1
AT3G57930	-0.66186	4.34622	0.0345422	0.47989
AT2G46490	-0.412496	4.62953	0.0346505	0.479943
AT3G17740	0.566725	3.10772	0.0346211	0.479943
AT5G53940	-0.426761	3.86735	0.0346266	0.479943	Yippee family putative zinc-binding protein
AT1G19970	-0.808937	1.20029	0.0347777	0.480783	ER lumen protein retaining receptor family protein
AT3G43600	0.342826	5.81711	0.0348209	0.480783	aldehyde oxidase 2
AT5G25560	0.462204	5.4255	0.0348249	0.480783	CHY-type/CTCHY-type/RING-type Zinc finger protein
AT5G64480	-0.474134	4.40333	0.0348047	0.480783
AT2G43460	-0.37677	6.61897	0.0348649	0.480842	Ribosomal L38e protein family
AT4G38740	-0.547221	7.85877	0.034886	0.480842	rotamase CYP 1
AT1G30750	-0.603956	3.81153	0.0349615	0.480942
AT2G32230	0.335629	6.31185	0.0349281	0.480942	proteinaceous RNase P 1
AT3G58680	-0.385764	6.85366	0.0349864	0.480942	multiprotein bridging factor 1B
AT4G08685	-0.495842	3.73638	0.035007	0.480942	Pollen Ole e 1 allergen and extensin family protein
AT1G03230	-0.773447	4.36439	0.0350848	0.481005	Eukaryotic aspartyl protease family protein
AT1G28280	-0.377862	6.37745	0.0351255	0.481005	VQ motif-containing protein
AT3G09030	-0.425327	3.48983	0.0350973	0.481005	BTB/POZ domain-containing protein
AT5G20160	-0.358345	5.06985	0.0350407	0.481005	Ribosomal protein L7Ae/L30e/S12e/Gadd45 family protein
AT1G15270	-0.411136	6.36891	0.0353743	0.48226	Translation machinery associated TMA7
AT1G52300	-0.36584	7.47253	0.035524	0.48226	Zinc-binding ribosomal protein family protein
AT2G36270	-0.724655	1.77435	0.0355615	0.48226	Basic-leucine zipper (bZIP) transcription factor family protein
AT2G41420	-0.477312	7.32547	0.035477	0.48226	proline-rich family protein
AT3G48690	-0.416272	7.03883	0.0354543	0.48226	alpha/beta-Hydrolases superfamily protein
AT3G50620	0.634238	1.96102	0.0354369	0.48226	P-loop containing nucleoside triphosphate hydrolases superfamily protein
AT4G22770	-0.83634	0.885784	0.0355823	0.48226	AT hook motif DNA-binding family protein
AT4G29380	0.406087	4.76493	0.0352797	0.48226	protein kinase family protein / WD-40 repeat family protein
AT4G29840	-0.34204	5.88964	0.0355878	0.48226	Pyridoxal-5'-phosphate-dependent enzyme family protein
AT4G40030	-0.355545	7.16031	0.0353695	0.48226	Histone superfamily protein
AT5G27950	-0.384879	4.34173	0.0355343	0.48226	P-loop containing nucleoside triphosphate hydrolases superfamily protein
AT5G44005	-0.940107	2.6819	0.0352639	0.48226
AT5G52120	-0.501454	4.01681	0.0355206	0.48226	phloem protein 2-A14
AT1G20580	-0.365718	5.63434	0.0357128	0.482288	Small nuclear ribonucleoprotein family protein
AT1G71240	0.589167	4.62092	0.0358196	0.482288	Plant protein of unknown function (DUF639)
AT2G22122	-0.571416	5.20961	0.0358281	0.482288
AT3G12040	-0.868116	0.865167	0.0356395	0.482288	DNA-3-methyladenine glycosylase (MAG)
AT3G22170	0.3471	5.52187	0.0357132	0.482288	far-red elongated hypocotyls 3
AT3G44590	-0.567607	3.60795	0.0356678	0.482288	60S acidic ribosomal protein family
AT3G52630	-0.698566	2.19705	0.035875	0.482288	Nucleic acid-binding, OB-fold-like protein
AT5G21105	-0.426297	6.57911	0.0358387	0.482288	Plant L-ascorbate oxidase
AT5G35620	-0.301253	5.84063	0.0357344	0.482288	Eukaryotic initiation factor 4E protein
AT5G44580	-0.507784	6.4193	0.0358482	0.482288
AT2G41905	-0.76585	2.16252	0.03592	0.482509
AT1G16610	0.412263	4.93698	0.0360595	0.482832	arginine/serine-rich 45
AT1G60870	-0.361774	5.2728	0.0360251	0.482832	maternal effect embryo arrest 9
AT3G15480	-0.393744	6.06945	0.0360354	0.482832	Protein of unknown function (DUF1218)
AT5G06700	-0.413096	6.9496	0.0360451	0.482832	Plant protein of unknown function (DUF828)
AT5G25265	-0.369686	5.70495	0.0360868	0.482832
AT3G09810	-0.505527	3.93264	0.0361757	0.483328	isocitrate dehydrogenase VI
AT3G11510	-0.38827	7.07805	0.036181	0.483328	Ribosomal protein S11 family protein
AT5G01340	-0.638547	1.86223	0.0362293	0.483591	Mitochondrial substrate carrier family protein
AT3G11420	-0.547852	4.28846	0.0363113	0.484303	Protein of unknown function (DUF604)
AT5G06290	0.441489	8.45279	0.0364267	0.485459	2-cysteine peroxiredoxin B
AT5G66960	-0.759955	2.30898	0.0364583	0.485498	Prolyl oligopeptidase family protein
AT3G63190	0.360065	6.81408	0.0365133	0.485849	ribosome recycling factor, chloroplast precursor
AT1G23260	-0.353177	4.15207	0.0366029	0.486552	MMS ZWEI homologue 1
AT1G73970	0.504209	3.27288	0.0366255	0.486552
AT4G18120	0.497263	4.63596	0.0366525	0.486552	MEI2-like 3
AT1G21130	-0.753895	7.23739	0.0367203	0.486616	O-methyltransferase family protein
AT1G60220	0.368595	4.30646	0.0366867	0.486616	UB-like protease 1D
AT3G50970	-0.787708	4.41747	0.0367437	0.486616	dehydrin family protein
AT2G05935	0.780276	1.29808	0.0368624	0.486664	transposable element gene
AT3G01520	-0.429244	5.63104	0.0368054	0.486664	Adenine nucleotide alpha hydrolases-like superfamily protein
AT3G10940	0.461051	5.70041	0.03679	0.486664	dual specificity protein phosphatase (DsPTP1) family protein
AT3G52670	0.738519	1.01433	0.0368346	0.486664	FBD, F-box, Skp2-like and Leucine Rich Repeat domains containing protein
AT4G15110	0.366921	6.14824	0.0369587	0.487555	cytochrome P450, family 97, subfamily B, polypeptide 3
AT5G04130	0.341043	5.36351	0.0370549	0.488443	DNA GYRASE B2
AT1G11960	-0.738065	3.77981	0.0371189	0.488905	ERD (early-responsive to dehydration stress) family protein
AT5G11690	0.59961	2.52483	0.0371552	0.489003	translocase inner membrane subunit 17-3
AT3G55020	0.353093	5.20609	0.0371929	0.489119	Ypt/Rab-GAP domain of gyp1p superfamily protein
AT2G44410	-0.411523	3.93669	0.0372221	0.489122	RING/U-box superfamily protein
AT3G52730	-0.385312	6.22286	0.0372638	0.489289	ubiquinol-cytochrome C reductase UQCRX/QCR9-like family protein
AT1G32583	-0.935224	0.722382	0.037391	0.48944
AT4G18060	0.362358	4.45763	0.0373339	0.48944	SH3 domain-containing protein
AT5G66090	-0.424907	5.79385	0.0373154	0.48944
AT5G67560	-0.415402	4.37128	0.0373692	0.48944	ADP-ribosylation factor-like A1D
AT5G35930	0.59274	2.75195	0.037468	0.490069	AMP-dependent synthetase and ligase family protein
AT3G23530	0.330288	5.53722	0.0375669	0.490982	Cyclopropane-fatty-acyl-phospholipid synthase
AT3G22620	0.60386	4.90843	0.0376326	0.491083	Bifunctional inhibitor/lipid-transfer protein/seed storage 2S albumin superfamily protein
AT5G58510	0.515614	3.56895	0.0376247	0.491083
AT1G66230	-0.516056	2.83046	0.037784	0.49114	myb domain protein 20
AT1G74458	-0.610881	2.64132	0.0377566	0.49114
AT2G04795	-0.530432	3.63285	0.0377854	0.49114
AT2G25200	-1.02248	3.26324	0.0376716	0.49114	Plant protein of unknown function (DUF868)
AT2G27030	-0.371078	5.24315	0.0377812	0.49114	calmodulin 5
AT3G02910	-0.485269	4.8762	0.0378113	0.49114	AIG2-like (avirulence induced gene) family protein
AT5G55896	-0.720164	2.06995	0.0378895	0.491779	transposable element gene
AT1G76490	-0.455802	8.96065	0.0379886	0.491806	hydroxy methylglutaryl CoA reductase 1
AT3G17590	0.543463	2.7019	0.0379299	0.491806	transcription regulatory protein SNF5, putative (BSH)
AT4G30280	-0.783341	7.06207	0.038008	0.491806	xyloglucan endotransglucosylase/hydrolase 18
AT4G37240	-0.786972	2.39827	0.0380006	0.491806
AT1G29700	0.428435	7.03047	0.0381273	0.492974	Metallo-hydrolase/oxidoreductase superfamily protein
AT1G20050	-0.428883	4.44281	0.0381683	0.493126	C-8,7 sterol isomerase
AT4G01895	-0.885542	0.467556	0.0382216	0.493438	systemic acquired resistance (SAR) regulator protein NIMIN-1-related
AT1G05140	-0.430889	6.2125	0.0383094	0.493817	Peptidase M50 family protein
AT2G26240	-0.45551	3.77308	0.0383072	0.493817	Transmembrane proteins 14C
AT3G06200	-0.378673	4.0728	0.0384264	0.494195	P-loop containing nucleoside triphosphate hydrolases superfamily protein
AT4G15920	-0.372835	4.62344	0.0384028	0.494195	Nodulin MtN3 family protein
AT5G36120	-0.56386	5.68075	0.0383705	0.494195	cofactor assembly, complex C (B6F)
AT1G03495	0.613735	2.20654	0.0385865	0.494784	HXXXD-type acyl-transferase family protein
AT1G08770	-0.491422	3.67145	0.0385076	0.494784	prenylated RAB acceptor 1.E
AT1G53780	0.633605	3.92117	0.0386258	0.494784	peptidyl-prolyl cis-trans isomerases;hydrolases;nucleoside-triphosphatases;ATP binding;nucleotide binding;ATPases
AT2G04160	-0.362688	5.66211	0.0385985	0.494784	Subtilisin-like serine endopeptidase family protein
AT3G03920	-0.399871	6.46688	0.0385645	0.494784	H/ACA ribonucleoprotein complex, subunit Gar1/Naf1 protein
AT3G27925	0.374944	7.3434	0.0386477	0.494784	DegP protease 1
AT2G26640	-0.391302	4.46217	0.0387871	0.49507	3-ketoacyl-CoA synthase 11
AT2G45310	-0.965165	0.404594	0.0387315	0.49507	UDP-D-glucuronate 4-epimerase 4
AT3G02700	-0.387015	4.39553	0.038758	0.49507	NC domain-containing protein-related
AT3G27997	-0.536587	2.68518	0.0387571	0.49507
AT5G53360	-0.639842	2.09533	0.0388182	0.495093	TRAF-like superfamily protein
AT1G07140	-0.32922	7.12237	0.0389257	0.49609	Pleckstrin homology (PH) domain superfamily protein
AT3G60600	-0.314612	6.16969	0.0390977	0.497609	vesicle associated protein
AT5G02940	0.444184	6.92428	0.0391037	0.497609	Protein of unknown function (DUF1012)
AT5G24090	-0.54567	3.40669	0.0391533	0.497865	chitinase A
AT4G10600	-0.518928	2.78392	0.0392265	0.498421	RING/FYVE/PHD zinc finger superfamily protein
AT1G16870	0.334669	4.71831	0.0393323	0.498929	mitochondrial 28S ribosomal protein S29-related
AT1G20020	0.391416	9.51429	0.039518	0.498929	ferredoxin-NADP(+)-oxidoreductase 2
AT1G31460	-0.728585	1.51229	0.0393335	0.498929
AT1G58235	-0.515013	3.22066	0.0395345	0.498929
AT1G76450	0.390924	6.82138	0.0395372	0.498929	Photosystem II reaction center PsbP family protein
AT3G04400	-0.378298	8.54619	0.0394801	0.498929	Ribosomal protein L14p/L23e family protein
AT3G05070	-0.406127	4.15927	0.0393752	0.498929
AT4G17895	-0.603052	2.53338	0.0395615	0.498929	ubiquitin-specific protease 20
AT5G02370	0.47668	3.2744	0.0395444	0.498929	ATP binding microtubule motor family protein
AT5G63950	0.420323	3.76506	0.0394053	0.498929	chromatin remodeling 24
AT1G27060	0.657178	1.39051	0.0396485	0.499068	Regulator of chromosome condensation (RCC1) family protein
AT4G36830	0.729988	1.52508	0.039661	0.499068	GNS1/SUR4 membrane protein family
AT5G44585	-0.998925	3.08141	0.0396416	0.499068
AT1G74100	-0.479274	5.85151	0.0398616	0.501219	sulfotransferase 16
AT2G25490	0.396917	6.15835	0.0399671	0.501998	EIN3-binding F box protein 1
AT3G14067	-0.377068	7.58086	0.0399965	0.501998	Subtilase family protein
AT4G38350	-0.30864	5.66253	0.0400126	0.501998	Patched family protein
AT3G01050	-0.545994	2.9121	0.0400803	0.502475	membrane-anchored ubiquitin-fold protein 1 precursor
AT3G56900	0.526872	2.72627	0.040155	0.503038	Transducin/WD40 repeat-like superfamily protein
AT5G16380	-0.588302	2.63453	0.0402517	0.503876	Protein of unknown function, DUF538
AT3G03000	-0.665248	2.38351	0.0403061	0.504184	EF hand calcium-binding protein family
AT1G02160	-0.493016	3.28606	0.0404648	0.504744	Cox19 family protein (CHCH motif)
AT1G13690	-0.435537	3.55682	0.0404703	0.504744	ATPase E1
AT4G36840	-0.589312	2.19112	0.0404602	0.504744	Galactose oxidase/kelch repeat superfamily protein
AT5G58750	-0.644337	2.72512	0.0404479	0.504744	NAD(P)-binding Rossmann-fold superfamily protein
AT5G48300	0.406502	8.47329	0.0405084	0.504848	ADP glucose pyrophosphorylase 1
AT2G41720	0.345151	4.88592	0.0405654	0.505186	Tetratricopeptide repeat (TPR)-like superfamily protein
AT3G09200	-0.389082	8.89372	0.0408358	0.507813	Ribosomal protein L10 family protein
AT4G21820	0.529235	2.98551	0.0408364	0.507813	binding;calmodulin binding
AT2G03280	0.731692	1.96717	0.0409938	0.50809	O-fucosyltransferase family protein
AT2G07340	-0.406505	4.29181	0.0409246	0.50809	PREFOLDIN 1
AT2G44740	-0.565199	2.5348	0.0409881	0.50809	cyclin p4;1
AT4G34830	0.364463	6.38268	0.040917	0.50809	Pentatricopeptide repeat (PPR) superfamily protein
AT5G25440	-0.782391	2.52558	0.0410089	0.50809	Protein kinase superfamily protein
AT1G06290	0.3081	5.98587	0.0411344	0.508155	acyl-CoA oxidase 3
AT2G37340	0.370977	6.25521	0.0411333	0.508155	arginine/serine-rich zinc knuckle-containing protein 33
AT3G04000	-0.654895	1.69248	0.0411121	0.508155	NAD(P)-binding Rossmann-fold superfamily protein
AT4G01850	-0.380877	8.54735	0.0410801	0.508155	S-adenosylmethionine synthetase 2
AT4G16780	-0.438896	3.45861	0.0412553	0.508905	homeobox protein 2
AT5G48180	-0.501531	8.07163	0.0412319	0.508905	nitrile specifier protein 5
AT1G65420	-0.582503	2.22576	0.0414837	0.511351	Protein of unknown function (DUF565)
AT4G19120	-0.506403	3.87396	0.0415928	0.512014	S-adenosyl-L-methionine-dependent methyltransferases superfamily protein
AT5G52960	-0.396581	4.76798	0.0415981	0.512014
AT1G66260	-0.386501	7.2543	0.0416338	0.51208	RNA-binding (RRM/RBD/RNP motifs) family protein
AT1G76060	-0.473136	3.38267	0.0417891	0.512129	LYR family of Fe/S cluster biogenesis protein
AT4G04800	-0.372554	4.04208	0.0417564	0.512129	methionine sulfoxide reductase B3
AT4G18140	0.66728	2.70544	0.0416735	0.512129	SCP1-like small phosphatase 4b
AT5G17020	0.328765	6.10139	0.041754	0.512129	exportin 1A
AT5G24320	0.393185	4.29748	0.0417695	0.512129	Transducin/WD40 repeat-like superfamily protein
AT2G30640	0.690522	1.40322	0.041852	0.512527	transposable element gene
AT1G15980	0.452038	8.04794	0.0419213	0.513005	NDH-dependent cyclic electron flow 1
AT1G28200	-0.350241	4.68277	0.0419544	0.513039	FH interacting protein 1
AT4G15690	-0.728617	3.13212	0.0420269	0.513183	Thioredoxin superfamily protein
AT4G38690	-0.456967	5.28866	0.0420073	0.513183	PLC-like phosphodiesterases superfamily protein
AT4G28060	-0.387841	5.04344	0.0421529	0.514351	Cytochrome c oxidase, subunit Vib family protein
AT3G03690	-0.477051	3.12421	0.0421916	0.514446	Core-2/I-branching beta-1,6-N-acetylglucosaminyltransferase family protein
AT5G26820	0.395178	6.51627	0.0422216	0.514446	iron-regulated protein 3
AT2G21190	-0.309285	5.1869	0.0422616	0.514563	ER lumen protein retaining receptor family protein
AT4G12690	-0.615667	3.32721	0.0423705	0.515206	Plant protein of unknown function (DUF868)
AT5G66870	-0.685688	2.04764	0.0423753	0.515206	ASYMMETRIC LEAVES 2-like 1
AT5G58590	-0.405855	6.51962	0.0425183	0.516573	RAN binding protein 1
AT4G14615	-0.350598	4.53149	0.0425851	0.516642
AT5G07990	0.564412	2.80912	0.0425578	0.516642	Cytochrome P450 superfamily protein
AT3G12130	-0.349761	4.33119	0.0426364	0.516894	KH domain-containing protein / zinc finger (CCCH type) family protein
AT1G11860	0.406559	10.6397	0.042669	0.516919	Glycine cleavage T-protein family
AT3G52040	-0.402775	4.09706	0.0427587	0.517635
AT4G27710	-0.355165	6.0267	0.042883	0.518394	cytochrome P450, family 709, subfamily B, polypeptide 3
AT5G15802	-0.561027	3.22154	0.0429134	0.518394
AT5G54750	-0.388938	3.932	0.0428634	0.518394	Transport protein particle (TRAPP) component
AT4G30750	-0.3491	4.49284	0.0429857	0.518594
AT5G66810	0.420511	4.30775	0.0429913	0.518594
AT1G18090	0.677246	2.07999	0.0432416	0.518653	5'-3' exonuclease family protein
AT1G27440	-0.483961	2.70816	0.0431325	0.518653	Exostosin family protein
AT1G54740	-0.661258	6.79219	0.043214	0.518653	Protein of unknown function (DUF3049)
AT1G76280	0.444926	3.64285	0.0430869	0.518653	Tetratricopeptide repeat (TPR)-like superfamily protein
AT2G16700	-0.429967	4.93982	0.0431746	0.518653	actin depolymerizing factor 5
AT2G41110	-0.464391	5.30936	0.0430738	0.518653	calmodulin 2
AT3G18280	-0.619463	4.16033	0.0431651	0.518653	Bifunctional inhibitor/lipid-transfer protein/seed storage 2S albumin superfamily protein
AT5G24655	-0.861892	1.09505	0.0432163	0.518653	response to low sulfur 4
AT1G65000	-0.641071	1.46322	0.0432737	0.518671
AT5G11420	-0.445507	6.10061	0.0433376	0.519069	Protein of unknown function, DUF642
AT1G14160	0.862737	1.24851	0.0436374	0.519091	Uncharacterised protein family (UPF0497)
AT1G51560	0.454853	3.57374	0.0434771	0.519091	Pyridoxamine 5'-phosphate oxidase family protein
AT1G52342	-0.614906	4.59215	0.0436229	0.519091
AT1G55890	-0.443946	3.79884	0.0437332	0.519091	Tetratricopeptide repeat (TPR)-like superfamily protein
AT1G64230	-0.464641	8.16414	0.0434632	0.519091	ubiquitin-conjugating enzyme 28
AT1G66410	-0.419388	6.37444	0.0437288	0.519091	calmodulin 4
AT3G04490	0.41342	4.03555	0.0437132	0.519091
AT3G09500	-0.362537	6.85552	0.0436286	0.519091	Ribosomal L29 family protein
AT3G22220	0.336038	4.61652	0.0436093	0.519091	hAT transposon superfamily
AT3G62410	-0.420813	7.38992	0.0436313	0.519091	CP12 domain-containing protein 2
AT5G22010	0.346971	4.86635	0.0435217	0.519091	replication factor C1
AT5G40920	0.474127	3.6629	0.0437384	0.519091
AT5G42300	-0.346337	6.47919	0.0433962	0.519091	ubiquitin-like protein 5
AT2G25840	0.345827	5.49845	0.0437955	0.519404	Nucleotidylyl transferase superfamily protein
AT1G68440	-0.609967	6.17821	0.0439267	0.520594
AT5G07730	-0.609688	1.60171	0.0439935	0.521021
AT1G77740	-0.330885	5.7003	0.0440603	0.521082	phosphatidylinositol-4-phosphate 5-kinase 2
AT4G25800	0.77635	1.52136	0.0440485	0.521082	Calmodulin-binding protein
AT2G42530	-0.847392	2.37269	0.0441095	0.521127	cold regulated 15b
AT5G15320	-0.405735	5.32562	0.0441257	0.521127
AT1G63090	-0.488819	4.47506	0.0443573	0.523058	phloem protein 2-A11
AT3G05880	-0.388632	6.99524	0.044369	0.523058	Low temperature and salt responsive protein family
AT5G17560	-0.409223	5.27472	0.044382	0.523058	BolA-like family protein
AT1G67195	-0.425828	4.1865	0.0444995	0.523152	MIR414 (MICRORNA 414)
AT2G47170	-0.338254	7.5607	0.0445137	0.523152	Ras-related small GTP-binding family protein
AT5G04880	-0.698033	1.77402	0.0444759	0.523152
AT5G64620	-0.58674	4.62126	0.0445018	0.523152	cell wall / vacuolar inhibitor of fructosidase 2
AT1G08460	-0.386558	3.92803	0.0447885	0.523172	histone deacetylase 8
AT1G68110	-0.774772	1.62786	0.0445669	0.523172	ENTH/ANTH/VHS superfamily protein
AT1G68620	-0.743308	2.55651	0.0446396	0.523172	alpha/beta-Hydrolases superfamily protein
AT2G31200	-0.392206	4.54902	0.0447366	0.523172	actin depolymerizing factor 6
AT2G41450	0.848576	0.657269	0.0448248	0.523172	N-acetyltransferases;N-acetyltransferases
AT3G04550	-0.38394	7.0339	0.0447366	0.523172
AT3G12145	-0.673534	3.54757	0.0448146	0.523172	Leucine-rich repeat (LRR) family protein
AT5G27330	-0.421655	5.7302	0.0447279	0.523172	Prefoldin chaperone subunit family protein
AT5G44565	-0.892362	0.873428	0.0445825	0.523172
AT5G55540	0.364585	4.47813	0.0448188	0.523172	tornado 1
AT2G36835	-0.39518	5.27171	0.0448791	0.523177
AT4G17140	0.368072	6.03288	0.044918	0.523177	pleckstrin homology (PH) domain-containing protein
AT4G26690	-0.434626	7.56317	0.044894	0.523177	PLC-like phosphodiesterase family protein
AT3G14110	0.352401	6.48135	0.0450075	0.523858	Tetratricopeptide repeat (TPR)-like superfamily protein
AT2G07719	0.717357	1.81414	0.0451762	0.5251	Putative membrane lipoprotein
AT3G02030	-0.776428	1.91546	0.0451627	0.5251	transferases, transferring acyl groups other than amino-acyl groups;acyltransferases
AT1G55675	-0.533615	2.77915	0.0452899	0.526059
AT4G29480	-0.316505	6.26696	0.0453699	0.526627	Mitochondrial ATP synthase subunit G protein
AT5G19151	-0.813367	1.26785	0.0454049	0.526672
AT4G38980	-0.609102	2.79154	0.0454674	0.527036
AT4G18710	-0.336506	6.95378	0.0455726	0.527893	Protein kinase superfamily protein
AT1G15420	-0.361926	3.89622	0.0460908	0.528048
AT1G23790	0.570122	2.15161	0.0460854	0.528048	Plant protein of unknown function (DUF936)
AT1G33330	-0.395213	3.89543	0.0457344	0.528048	Class I peptide chain release factor
AT1G54850	-0.432932	3.4727	0.0458276	0.528048	HSP20-like chaperones superfamily protein
AT1G71820	0.323353	5.81532	0.046022	0.528048	SEC6
AT2G18960	-0.329552	9.38637	0.0458003	0.528048	H(+)-ATPase 1
AT2G41140	0.335951	4.58927	0.0461167	0.528048	CDPK-related kinase 1
AT3G14362	-0.814155	1.54493	0.0456548	0.528048	ROTUNDIFOLIA like 10
AT3G60770	-0.348	6.8983	0.0459843	0.528048	Ribosomal protein S13/S15
AT3G62550	-0.62616	6.94961	0.0460363	0.528048	Adenine nucleotide alpha hydrolases-like superfamily protein
AT4G09010	0.366607	7.46144	0.046005	0.528048	ascorbate peroxidase 4
AT4G18840	-0.690577	1.55668	0.0456833	0.528048	Pentatricopeptide repeat (PPR-like) superfamily protein
AT4G21170	-0.703561	1.92433	0.0459963	0.528048	Tetratricopeptide repeat (TPR)-like superfamily protein
AT5G08740	0.351572	6.30929	0.0459358	0.528048	NAD(P)H dehydrogenase C1
AT5G59850	-0.432533	6.0733	0.0458547	0.528048	Ribosomal protein S8 family protein
AT5G60920	-0.34243	7.67516	0.0460468	0.528048	COBRA-like extracellular glycosyl-phosphatidyl inositol-anchored protein family
AT5G67420	-0.394559	6.80098	0.0459448	0.528048	LOB domain-containing protein 37
AT2G44640	-0.353553	5.08005	0.0461568	0.528149
AT2G43010	-0.375918	6.29024	0.0462584	0.528596	phytochrome interacting factor 4
AT5G24850	0.400631	4.01176	0.0462485	0.528596	cryptochrome 3
AT3G02065	0.470875	3.21736	0.0463396	0.529166	P-loop containing nucleoside triphosphate hydrolases superfamily protein
AT1G49410	-0.53749	3.31966	0.0464043	0.529547	translocase of the outer mitochondrial membrane 6
AT1G06380	-0.586087	2.4589	0.0467097	0.529582	Ribosomal protein L1p/L10e family
AT2G29080	0.317928	6.38337	0.0464858	0.529582	FTSH protease 3
AT2G31955	-0.486263	3.36271	0.0466892	0.529582	cofactor of nitrate reductase and xanthine dehydrogenase 2
AT3G10190	-0.883839	1.11728	0.0466434	0.529582	Calcium-binding EF-hand family protein
AT3G12520	0.591512	2.67883	0.0467205	0.529582	sulfate transporter 4;2
AT3G19030	-0.928222	5.45111	0.046676	0.529582
AT4G22710	-0.831707	1.19467	0.0465125	0.529582	cytochrome P450, family 706, subfamily A, polypeptide 2
AT4G27657	-0.898133	2.73977	0.046562	0.529582
AT5G35680	-0.393661	5.14469	0.0465814	0.529582	Nucleic acid-binding, OB-fold-like protein
AT5G59610	-0.483677	3.55844	0.0465557	0.529582	Chaperone DnaJ-domain superfamily protein
AT1G33600	-0.721319	6.45914	0.0467908	0.52977	Leucine-rich repeat (LRR) family protein
AT5G44600	0.625748	2.74664	0.0467997	0.52977	S-adenosyl-L-methionine-dependent methyltransferases superfamily protein
AT5G48800	0.626476	1.87307	0.0468389	0.529859	Phototropic-responsive NPH3 family protein
AT1G16460	-0.358822	5.19758	0.0468994	0.530189	rhodanese homologue 2
AT1G05560	-0.692322	4.44508	0.0470974	0.531008	UDP-glucosyltransferase 75B1
AT1G18840	0.444016	4.23842	0.0470927	0.531008	IQ-domain 30
AT2G38680	0.638767	1.87434	0.0470067	0.531008	5'-nucleotidases;magnesium ion binding
AT4G05320	-0.356029	8.60342	0.0470622	0.531008	polyubiquitin 10
AT2G39440	-0.755949	1.68971	0.0472007	0.53176
AT3G18560	-0.775049	3.41794	0.0472585	0.53176
AT5G16660	-0.400271	5.88133	0.0472412	0.53176
AT5G50915	-0.515424	4.11001	0.047296	0.531828	basic helix-loop-helix (bHLH) DNA-binding superfamily protein
AT1G19770	-0.62378	7.2486	0.0474723	0.532042	purine permease 14
AT1G30470	0.304946	5.74872	0.0474234	0.532042	SIT4 phosphatase-associated family protein
AT3G17090	-0.31284	4.77402	0.0474684	0.532042	Protein phosphatase 2C family protein
AT5G16220	-0.34661	4.44274	0.0473757	0.532042	Octicosapeptide/Phox/Bem1p family protein
AT5G63480	-0.605352	1.60441	0.0474409	0.532042
AT5G49465	-0.933248	1.05838	0.0475991	0.53311	transposable element gene
AT3G59490	-0.517074	2.89552	0.0477391	0.533617
AT4G39300	-0.476911	3.84874	0.0477351	0.533617
AT5G59613	-0.338806	5.94099	0.0476784	0.533617
AT2G30780	-0.542304	2.94821	0.0478726	0.534051	Tetratricopeptide repeat (TPR)-like superfamily protein
AT5G12900	0.427091	3.98166	0.047844	0.534051
AT5G24840	0.554483	1.6461	0.0478134	0.534051	tRNA (guanine-N-7) methyltransferase
AT2G13370	0.339706	6.17798	0.0479164	0.534187	chromatin remodeling 5
AT1G61260	-0.441745	3.1663	0.0480278	0.53506	Protein of unknown function (DUF761)
AT3G27750	-0.545632	3.16373	0.0480579	0.53506
AT5G42146	-0.641909	2.32359	0.0482124	0.536426
AT3G48200	-0.426829	7.41261	0.048252	0.536514
AT5G04530	-0.40176	4.66407	0.0482918	0.536604	3-ketoacyl-CoA synthase 19
AT1G35430	-0.674354	1.45803	0.0483709	0.53713
AT4G00990	0.356313	4.1802	0.0484285	0.537417	Transcription factor jumonji (jmjC) domain-containing protein
AT4G24370	-0.563729	2.13997	0.0484956	0.537809
AT2G45180	-0.516819	11.1274	0.0485696	0.537923	Bifunctional inhibitor/lipid-transfer protein/seed storage 2S albumin superfamily protein
AT5G65570	-0.721877	1.33745	0.0485453	0.537923	Tetratricopeptide repeat (TPR)-like superfamily protein
AT5G38980	-0.47086	5.07586	0.0486054	0.537967
AT1G06530	-0.349002	5.82259	0.0487534	0.53801	Tropomyosin-related
AT1G67148	-0.746436	1.92634	0.0486947	0.53801
AT2G46380	0.619063	1.55767	0.0487683	0.53801	Protein of unknown function (DUF3133)
AT3G04530	0.608865	1.56747	0.0487092	0.53801	phosphoenolpyruvate carboxylase kinase 2
AT5G23740	-0.365331	6.52933	0.0486695	0.53801	ribosomal protein S11-beta
AT2G15270	-0.461403	3.18053	0.0488696	0.538426
AT2G20930	-0.419815	3.43127	0.0488547	0.538426	SNARE-like superfamily protein
AT2G25320	-0.365816	4.69871	0.0490481	0.539341	TRAF-like family protein
AT2G35830	-0.394698	5.46209	0.0490803	0.539341
AT3G05090	0.354784	4.73404	0.0490063	0.539341	Transducin/WD40 repeat-like superfamily protein
AT4G36870	-0.35817	5.81787	0.049058	0.539341	BEL1-like homeodomain 2
AT5G49100	0.513982	3.54672	0.0491405	0.539652
AT1G26150	-0.335697	6.36009	0.0492525	0.539769	proline-rich extensin-like receptor kinase 10
AT2G06530	-0.377452	6.71387	0.0492789	0.539769	SNF7 family protein
AT2G47710	-0.349588	5.02028	0.0492298	0.539769	Adenine nucleotide alpha hydrolases-like superfamily protein
AT4G00905	-0.867815	0.560994	0.0492573	0.539769	NC domain-containing protein-related
AT3G22930	-0.829621	1.64702	0.0493478	0.540175	calmodulin-like 11
AT4G25180	0.532188	2.61286	0.0494198	0.540612	RNA polymerase III RPC4
AT4G10330	-0.511754	3.67471	0.0494679	0.540789	glycine-rich protein
AT1G45170	-0.484083	2.82661	0.0495087	0.540885
AT4G34510	0.85071	1.26485	0.0496009	0.541194	3-ketoacyl-CoA synthase 17
AT5G18850	-0.50785	2.84709	0.0495771	0.541194
AT2G01870	-0.646669	3.3155	0.0497	0.541926
AT1G23830	-0.625714	1.91124	0.0498417	0.542158
AT3G49260	0.380741	5.27211	0.049796	0.542158	IQ-domain 21
AT3G56200	-0.464841	3.34925	0.0498174	0.542158	Transmembrane amino acid transporter family protein
AT5G10390	-0.71907	2.24786	0.0498496	0.542158	Histone superfamily protein
AT2G38025	0.338234	5.16349	0.050129	0.54324	Cysteine proteinases superfamily protein
AT2G39760	-0.341585	4.93532	0.0500194	0.54324	BTB/POZ/MATH-domains containing protein
AT3G18830	-0.762096	4.70399	0.0500923	0.54324	polyol/monosaccharide transporter 5
AT3G48760	-0.337711	5.25799	0.0501418	0.54324	DHHC-type zinc finger family protein
AT5G38550	0.914459	1.30566	0.0501292	0.54324	Mannose-binding lectin superfamily protein
AT5G65495	-0.795341	1.4545	0.0500035	0.54324
AT1G07180	0.474763	6.95696	0.0504567	0.543426	alternative NAD(P)H dehydrogenase 1
AT1G09810	0.467385	3.2107	0.0504202	0.543426	evolutionarily conserved C-terminal region 11
AT1G23460	-0.507159	2.39491	0.0504505	0.543426	Pectin lyase-like superfamily protein
AT1G30070	-0.469336	4.79934	0.050451	0.543426	SGS domain-containing protein
AT2G21130	-0.486503	4.58676	0.0505009	0.543426	Cyclophilin-like peptidyl-prolyl cis-trans isomerase family protein
AT3G10480	-0.344293	4.61976	0.0505767	0.543426	NAC domain containing protein 50
AT3G11710	0.308688	6.39252	0.050559	0.543426	lysyl-tRNA synthetase 1
AT3G14060	-0.588042	2.2505	0.0504237	0.543426
AT4G11920	0.577935	1.8502	0.050371	0.543426	cell cycle switch protein 52 A2
AT4G14020	-0.415853	3.9886	0.0505381	0.543426	Rapid alkalinization factor (RALF) family protein
AT4G17810	-0.381422	4.47152	0.0503599	0.543426	C2H2 and C2HC zinc fingers superfamily protein
AT4G26100	0.339423	4.57652	0.0504715	0.543426	casein kinase 1
AT5G42200	-0.490773	2.73344	0.0504093	0.543426	RING/U-box superfamily protein
AT1G80600	-0.3248	6.72953	0.0506272	0.543624	HOPW1-1-interacting 1
AT1G48270	-0.551083	2.37058	0.0507224	0.543955	G-protein-coupled receptor 1
AT5G16570	-0.635026	1.80584	0.0506991	0.543955	glutamine synthetase 1;4
AT1G56500	0.358219	7.02398	0.0508928	0.544513	haloacid dehalogenase-like hydrolase family protein
AT1G75210	0.34175	5.82933	0.0509209	0.544513	HAD-superfamily hydrolase, subfamily IG, 5'-nucleotidase
AT2G38185	0.706845	1.64712	0.050896	0.544513	RING/U-box superfamily protein
AT3G22237	0.774045	1.80403	0.0509141	0.544513
AT3G50700	-0.523062	4.06509	0.0509354	0.544513	indeterminate(ID)-domain 2
AT5G19900	0.333643	5.17211	0.0510602	0.545502	PRLI-interacting factor, putative
AT5G23550	-0.41718	3.04921	0.0510995	0.545577	Got1/Sft2-like vescicle transport protein family
AT3G09250	-0.400876	4.09935	0.0512401	0.546389	Nuclear transport factor 2 (NTF2) family protein
AT5G55210	-0.482769	3.26035	0.0512136	0.546389
AT1G25682	-0.343889	4.49569	0.0513819	0.546611	Family of unknown function (DUF572)
AT3G06320	-0.483481	2.65367	0.0513848	0.546611	Ribosomal protein L33 family protein
AT3G53410	-0.49492	3.24914	0.0513764	0.546611	RING/U-box superfamily protein
AT5G56900	0.35268	4.35339	0.0513902	0.546611	CwfJ-like family protein / zinc finger (CCCH-type) family protein
AT3G11390	0.651394	1.53047	0.0514803	0.547225	Cysteine/Histidine-rich C1 domain family protein
AT2G04360	0.350037	5.30758	0.0516718	0.54805
AT3G48425	0.518997	2.93632	0.051733	0.54805	DNAse I-like superfamily protein
AT4G16745	0.827299	0.760864	0.0516473	0.54805	Exostosin family protein
AT5G13240	0.432068	4.48164	0.0517078	0.54805	transcription regulators
AT5G27700	-0.342984	6.18468	0.0517523	0.54805	Ribosomal protein S21e
AT5G64860	0.388189	4.25915	0.0517445	0.54805	disproportionating enzyme
AT1G06515	-0.327416	4.11089	0.0524417	0.548254	Protein of unknown function (DUF3317)
AT1G50600	0.359168	5.71574	0.0521602	0.548254	scarecrow-like 5
AT1G50940	0.441218	2.90034	0.0520762	0.548254	electron transfer flavoprotein alpha
AT1G62360	-0.817556	0.802599	0.0520488	0.548254	KNOX/ELK homeobox transcription factor
AT2G28000	0.373528	9.38193	0.0522012	0.548254	chaperonin-60alpha
AT2G33500	-0.495048	2.98695	0.0520486	0.548254	B-box type zinc finger protein with CCT domain
AT2G39390	-0.426588	4.91404	0.0523073	0.548254	Ribosomal L29 family protein
AT2G42975	-0.424963	4.16788	0.0518922	0.548254
AT3G05520	-0.300367	5.03778	0.0525496	0.548254	Subunits of heterodimeric actin filament capping protein Capz superfamily
AT3G10650	-0.304968	6.12057	0.0520711	0.548254
AT3G53490	-0.551614	1.87286	0.0522411	0.548254
AT3G60400	0.584857	2.26801	0.0519027	0.548254	Mitochondrial transcription termination factor family protein
AT3G60520	-0.451374	2.92983	0.0524959	0.548254
AT3G61415	0.400407	3.60067	0.0521599	0.548254	SKP1-like 21
AT4G20820	-0.740927	4.95311	0.0522549	0.548254	FAD-binding Berberine family protein
AT4G21350	-0.403593	3.12535	0.0521283	0.548254	plant U-box 8
AT4G28710	0.365734	4.66	0.0521627	0.548254	Myosin family protein with Dil domain
AT4G30993	-0.349674	4.8131	0.0525244	0.548254	Calcineurin-like metallo-phosphoesterase superfamily protein
AT4G35840	-0.45217	3.41142	0.0525008	0.548254	RING/U-box superfamily protein
AT5G01460	-0.331873	5.3653	0.0523747	0.548254	LMBR1-like membrane protein
AT5G52650	-0.362198	6.08791	0.0518886	0.548254	RNA binding Plectin/S10 domain-containing protein
AT5G63250	-0.99795	0.791911	0.0525355	0.548254	Carbohydrate-binding X8 domain superfamily protein
AT5G66290	-0.568068	2.54897	0.0525	0.548254
AT5G66350	-0.768212	1.09398	0.0524106	0.548254	Lateral root primordium (LRP) protein-related
AT1G02000	0.426263	3.67807	0.0528767	0.549032	UDP-D-glucuronate 4-epimerase 2
AT2G41830	0.419332	3.13632	0.0526732	0.549032	Uncharacterized protein
AT3G10020	-0.448469	7.96371	0.0528854	0.549032
AT3G16620	0.33293	4.29308	0.0528026	0.549032	translocon outer complex protein 120
AT3G49740	0.707622	1.14459	0.0527363	0.549032	Tetratricopeptide repeat (TPR)-like superfamily protein
AT4G18640	0.450078	3.48449	0.0528667	0.549032	Leucine-rich repeat protein kinase family protein
AT5G27650	0.355075	4.39176	0.0527571	0.549032	Tudor/PWWP/MBT superfamily protein
AT5G45560	-0.737281	2.00181	0.0527128	0.549032	Pleckstrin homology (PH) domain-containing protein / lipid-binding START domain-containing protein
AT5G60870	0.558226	2.03039	0.0529164	0.549032	Regulator of chromosome condensation (RCC1) family protein
AT2G15860	0.332512	5.04902	0.052985	0.54907
AT5G55740	0.381029	4.6157	0.0529545	0.54907	Tetratricopeptide repeat (TPR)-like superfamily protein
AT4G34265	-0.375092	5.6106	0.0531145	0.550075
AT1G77840	-0.329105	4.84999	0.0534636	0.550666	Translation initiation factor IF2/IF5
AT1G78310	-0.504969	3.77662	0.0534244	0.550666	VQ motif-containing protein
AT2G13550	-0.667203	1.88963	0.0532265	0.550666
AT2G37690	0.544562	3.26802	0.0532579	0.550666	phosphoribosylaminoimidazole carboxylase, putative / AIR carboxylase, putative
AT3G15540	-0.488629	2.51215	0.0534358	0.550666	indole-3-acetic acid inducible 19
AT4G28590	0.479727	2.44514	0.0533111	0.550666
AT4G36640	0.40661	3.45185	0.0534502	0.550666	Sec14p-like phosphatidylinositol transfer family protein
AT5G04800	-0.348175	5.98023	0.0534646	0.550666	Ribosomal S17 family protein
AT5G62980	-0.462674	3.01552	0.0533983	0.550666	Dihydroneopterin aldolase
AT1G44835	0.406003	3.56553	0.0537385	0.551309	YbaK/aminoacyl-tRNA synthetase-associated domain
AT1G52990	-0.739005	2.60803	0.0537143	0.551309	thioredoxin family protein
AT1G80380	0.376975	8.9535	0.0536397	0.551309	P-loop containing nucleoside triphosphate hydrolases superfamily protein
AT2G46310	-0.693373	1.87965	0.0537392	0.551309	cytokinin response factor 5
AT3G15060	-0.588327	3.09892	0.053668	0.551309	RAB GTPase homolog A1G
AT3G55830	-0.357828	4.68354	0.0537553	0.551309	Nucleotide-diphospho-sugar transferases superfamily protein
AT4G39530	0.875847	0.658742	0.0536711	0.551309	Tetratricopeptide repeat (TPR)-like superfamily protein
AT2G46630	-0.531844	4.83668	0.0537899	0.55133
AT1G76440	-0.620843	1.57565	0.0538645	0.551761	HSP20-like chaperones superfamily protein
AT1G13870	-0.396398	3.69976	0.0539975	0.552119	calmodulin binding;purine nucleotide binding
AT1G61180	0.366844	4.09582	0.0539779	0.552119	LRR and NB-ARC domains-containing disease resistance protein
AT4G02380	-0.786268	6.07748	0.0539834	0.552119	senescence-associated gene 21
AT1G05720	-0.540098	2.44742	0.0541625	0.553013	selenoprotein family protein
AT1G28310	-0.37245	3.97001	0.054253	0.553013	Dof-type zinc finger DNA-binding family protein
AT1G29930	-0.369297	13.0067	0.0541305	0.553013	chlorophyll A/B binding protein 1
AT1G30300	0.514331	2.38357	0.0545509	0.553013	Metallo-hydrolase/oxidoreductase superfamily protein
AT1G50040	-0.681564	3.11342	0.0550152	0.553013	Protein of unknown function (DUF1005)
AT1G50200	0.30838	7.86857	0.0548964	0.553013	Alanyl-tRNA synthetase
AT1G50900	-0.370917	5.77243	0.0546634	0.553013	Ankyrin repeat family protein
AT1G67170	-0.395851	3.29561	0.0547969	0.553013
AT1G70895	-0.66534	1.47338	0.0549148	0.553013	CLAVATA3/ESR-RELATED 17
AT2G13650	-0.455362	3.33144	0.0545969	0.553013	golgi nucleotide sugar transporter 1
AT2G39730	0.410057	13.6132	0.0542939	0.553013	rubisco activase
AT2G44300	0.815232	1.59183	0.0550479	0.553013	Bifunctional inhibitor/lipid-transfer protein/seed storage 2S albumin superfamily protein
AT3G02160	0.785307	1.27234	0.0547257	0.553013	Bromodomain transcription factor
AT3G05900	-0.433338	4.29794	0.0550311	0.553013	neurofilament protein-related
AT3G17300	-0.585847	2.61444	0.0549591	0.553013
AT3G22840	-0.462472	4.94152	0.0546654	0.553013	Chlorophyll A-B binding family protein
AT3G26360	-0.439149	4.03401	0.0544457	0.553013	Ribosomal protein S21 family protein
AT3G44380	-0.450576	3.15225	0.055128	0.553013	Late embryogenesis abundant (LEA) hydroxyproline-rich glycoprotein family
AT3G46430	-0.401413	4.88618	0.0545364	0.553013
AT3G48930	-0.390804	6.4371	0.054509	0.553013	Nucleic acid-binding, OB-fold-like protein
AT3G49710	-0.570123	2.18183	0.0546622	0.553013	Pentatricopeptide repeat (PPR) superfamily protein
AT4G10450	-0.450004	3.79451	0.0542877	0.553013	Ribosomal protein L6 family
AT4G14760	0.368656	4.82155	0.055118	0.553013	kinase interacting (KIP1-like) family protein
AT4G17270	0.33315	4.48042	0.0548282	0.553013	Mo25 family protein
AT4G24700	-0.658846	2.80426	0.0545651	0.553013
AT4G26240	-0.420286	3.38943	0.054836	0.553013
AT4G30460	-0.466838	5.52593	0.0547692	0.553013	glycine-rich protein
AT5G16440	-0.36112	4.27848	0.0549908	0.553013	isopentenyl diphosphate isomerase 1
AT5G23140	-0.363041	4.40683	0.0551312	0.553013	nuclear-encoded CLP protease P7
AT5G27660	0.519433	4.40195	0.0550773	0.553013	Trypsin family protein with PDZ domain
AT5G48960	-0.335637	4.57769	0.0543446	0.553013	HAD-superfamily hydrolase, subfamily IG, 5'-nucleotidase
AT5G60840	-0.426862	3.91799	0.0542157	0.553013
AT5G04270	-0.714756	1.33123	0.0551816	0.553189	DHHC-type zinc finger family protein
AT2G04940	0.433835	3.51114	0.0552974	0.553199	scramblase-related
AT3G52220	-0.308012	5.7747	0.0553133	0.553199
AT4G25090	0.634681	2.19215	0.0552905	0.553199	Riboflavin synthase-like superfamily protein
AT5G16890	-0.463873	3.20846	0.0552648	0.553199	Exostosin family protein
AT1G14790	0.679119	2.82714	0.0554137	0.553829	RNA-dependent RNA polymerase 1
AT5G43190	-0.713903	5.13367	0.0554419	0.553829	Galactose oxidase/kelch repeat superfamily protein
AT1G68920	0.367658	4.06496	0.0556635	0.555086	basic helix-loop-helix (bHLH) DNA-binding superfamily protein
AT1G76780	-0.562755	3.43586	0.0556729	0.555086	HSP20-like chaperones superfamily protein
AT3G27100	-0.429644	3.41274	0.055699	0.555086
AT3G57770	-0.649598	1.87416	0.0556772	0.555086	Protein kinase superfamily protein
AT1G19740	-0.402001	7.09146	0.0558684	0.555139	ATP-dependent protease La (LON) domain protein
AT2G39460	-0.352926	8.00275	0.0558651	0.555139	ribosomal protein L23AA
AT3G19260	0.492327	2.52418	0.0558303	0.555139	LAG1 homologue 2
AT3G50830	-0.40075	6.19036	0.055817	0.555139	cold-regulated 413-plasma membrane 2
AT5G01170	-0.529529	2.54591	0.0558676	0.555139	Protein of unknown function (DUF740)
AT5G04360	-0.463481	3.75703	0.0559158	0.555284	limit dextrinase
AT2G27400	-0.656468	2.44688	0.0560734	0.556522	TAS1A; other RNA
AT3G07870	-0.411154	4.09188	0.0562409	0.557378	F-box and associated interaction domains-containing protein
AT5G22800	0.388235	7.36244	0.0562585	0.557378	Alanyl-tRNA synthetase, class IIc
AT5G26860	0.310764	5.07185	0.0562	0.557378	lon protease 1
AT2G41840	-0.334018	8.47271	0.0564299	0.558154	Ribosomal protein S5 family protein
AT4G04790	0.77892	0.958436	0.056432	0.558154	Tetratricopeptide repeat (TPR)-like superfamily protein
AT4G37460	0.311765	5.93526	0.0564358	0.558154	Tetratricopeptide repeat (TPR)-like superfamily protein
AT1G30260	-0.593662	2.77476	0.0564912	0.558375
AT1G07660	-0.521555	2.53139	0.0565985	0.558957	Histone superfamily protein
AT2G27900	0.309522	4.55108	0.0566162	0.558957
AT3G44750	-0.487164	4.66344	0.0567108	0.559042	histone deacetylase 3
AT3G57140	-0.725737	1.54112	0.0568232	0.559042	sugar-dependent 1-like
AT4G00860	-0.380515	6.89949	0.0567843	0.559042	Protein of unknown function (DUF1138)
AT4G31160	-0.323955	4.99342	0.0568181	0.559042	DDB1-CUL4 associated factor 1
AT5G16950	-0.522788	2.87951	0.0567781	0.559042
AT5G60570	-0.289654	5.30568	0.0567191	0.559042	Galactose oxidase/kelch repeat superfamily protein
AT5G13300	0.325975	5.34853	0.0569191	0.559335	ARF GTPase-activating protein
AT5G61530	0.391879	4.4462	0.0568884	0.559335	small G protein family protein / RhoGAP family protein
AT2G38310	-0.497227	6.65863	0.0569533	0.559346	PYR1-like 4
AT2G19810	-0.710165	4.2774	0.0570321	0.559795	CCCH-type zinc finger family protein
AT1G10760	0.362585	8.22301	0.0571677	0.560476	Pyruvate phosphate dikinase, PEP/pyruvate binding domain
AT1G21060	-0.436699	3.81039	0.0571594	0.560476	Protein of unknown function, DUF547
AT1G03850	-0.66754	3.24451	0.0572299	0.56076	Glutaredoxin family protein
AT1G53300	0.316367	5.10763	0.0573201	0.561319	tetratricopetide-repeat thioredoxin-like 1
AT2G28080	-0.390635	3.93154	0.0574174	0.561946	UDP-Glycosyltransferase superfamily protein
AT2G29960	-0.302844	5.82889	0.057523	0.562328	cyclophilin 5
AT5G28020	0.43607	3.91378	0.0575058	0.562328	cysteine synthase D2
AT3G18060	0.304875	6.0292	0.0575942	0.5627	transducin family protein / WD-40 repeat family protein
AT1G66660	-0.527528	2.37244	0.05773	0.563051	Protein with RING/U-box and TRAF-like domains
AT1G67400	0.596324	2.50778	0.0577245	0.563051	ELMO/CED-12 family protein
AT5G55310	0.308775	5.89982	0.0577231	0.563051	DNA topoisomerase 1 beta
AT5G01650	-0.353175	5.40029	0.0578505	0.5639	Tautomerase/MIF superfamily protein
AT2G39090	0.407684	3.46083	0.0578996	0.564054	tetratricopeptide repeat (TPR)-containing protein
AT3G53730	-0.468934	3.78411	0.0580587	0.564628	Histone superfamily protein
AT4G39870	0.382376	3.47834	0.0580527	0.564628	TLD-domain containing nucleolar protein
AT5G05360	-0.465034	2.97513	0.0580243	0.564628
AT2G38720	0.590469	3.03481	0.0581817	0.565228	microtubule-associated protein 65-5
AT3G07510	-0.396069	3.59249	0.0581872	0.565228
AT1G11750	0.367982	7.42446	0.0583942	0.565971	CLP protease proteolytic subunit 6
AT2G30270	-0.408874	3.00499	0.058342	0.565971	Protein of unknown function (DUF567)
AT3G12290	0.290006	6.3847	0.058334	0.565971	Amino acid dehydrogenase family protein
AT5G47910	-0.744269	5.59223	0.0583976	0.565971	respiratory burst oxidase homologue D
AT3G01290	-0.732501	7.6654	0.0586306	0.567904	SPFH/Band 7/PHB domain-containing membrane-associated protein family
AT3G50670	-0.318976	6.22123	0.0586696	0.567957	U1 small nuclear ribonucleoprotein-70K
AT1G11180	0.379302	4.33348	0.0589774	0.568395	Secretory carrier membrane protein (SCAMP) family protein
AT1G55480	0.438972	9.12619	0.0589272	0.568395	protein containing PDZ domain, a K-box domain, and a TPR region
AT1G71220	0.297114	6.16737	0.0588879	0.568395	UDP-glucose:glycoprotein glucosyltransferases;transferases, transferring hexosyl groups;transferases, transferring glycosyl groups
AT2G43040	0.557915	2.17696	0.058931	0.568395	tetratricopeptide repeat (TPR)-containing protein
AT3G17680	0.565764	2.57491	0.0588454	0.568395	Kinase interacting (KIP1-like) family protein
AT3G22060	-0.746196	6.85674	0.0588835	0.568395	Receptor-like protein kinase-related family protein
AT4G16442	-0.39168	3.35867	0.0588932	0.568395	Uncharacterised protein family (UPF0497)
AT4G34720	-0.341014	7.74985	0.0590173	0.568395	ATPase, F0/V0 complex, subunit C protein
AT5G14850	-0.403661	3.15854	0.0589937	0.568395	Alg9-like mannosyltransferase family
AT5G06710	-0.509306	2.28737	0.0590731	0.568608	homeobox from Arabidopsis thaliana
AT1G80230	-0.33877	4.67402	0.0593426	0.569334	Rubredoxin-like superfamily protein
AT3G42630	0.558973	2.97397	0.0592274	0.569334	Pentatricopeptide repeat (PPR) superfamily protein
AT4G03520	-0.374677	8.34933	0.0593505	0.569334	Thioredoxin superfamily protein
AT4G39280	0.318559	5.42992	0.0593102	0.569334	phenylalanyl-tRNA synthetase, putative / phenylalanine--tRNA ligase, putative
AT5G46210	0.296278	6.3158	0.0592709	0.569334	cullin4
AT5G57120	-0.35469	6.5955	0.0592646	0.569334
AT2G34655	-0.567306	2.30808	0.0593967	0.569419
AT3G08030	-0.439558	6.60551	0.0595266	0.569419	Protein of unknown function, DUF642
AT3G27580	0.433926	3.13851	0.0594297	0.569419	Protein kinase superfamily protein
AT5G18800	-0.415376	4.55167	0.0595252	0.569419	Cox19-like CHCH family protein
AT5G55200	-0.451035	2.47005	0.0595277	0.569419	Co-chaperone GrpE family protein
AT4G11410	0.71212	1.95099	0.0595614	0.569419	NAD(P)-binding Rossmann-fold superfamily protein
AT4G00895	-0.410993	7.05809	0.0597423	0.570825	ATPase, F1 complex, OSCP/delta subunit protein
AT1G74250	-0.341435	5.98303	0.0598061	0.571113	DNAJ heat shock N-terminal domain-containing protein
AT4G30996	-0.36035	3.93484	0.0598615	0.571166	Protein of unknown function (DUF1068)
AT5G31909	0.510099	2.16003	0.0598792	0.571166
AT1G18670	-0.405586	3.82528	0.0601166	0.572139	Protein kinase superfamily protein
AT3G21640	-0.429669	3.51077	0.0601014	0.572139	FKBP-type peptidyl-prolyl cis-trans isomerase family protein
AT5G03660	-0.354094	6.49813	0.0600161	0.572139	Family of unknown function (DUF662)
AT5G37070	-0.501776	3.22173	0.0601063	0.572139	Protein of unknown function, DUF538
AT1G45230	-0.391269	4.41598	0.0602339	0.572612	Protein of unknown function (DUF3223)
AT5G06850	0.364543	3.63489	0.0602055	0.572612	C2 calcium/lipid-binding plant phosphoribosyltransferase family protein
AT4G25830	-0.427572	4.03047	0.0602885	0.572808	Uncharacterised protein family (UPF0497)
AT1G08125	0.381833	3.59541	0.0604484	0.573361	S-adenosyl-L-methionine-dependent methyltransferases superfamily protein
AT1G62960	0.355188	5.6813	0.0604332	0.573361	ACC synthase 10
AT1G70420	-0.587812	3.22191	0.060415	0.573361	Protein of unknown function (DUF1645)
AT2G28430	-0.387027	3.4003	0.0604848	0.573385
AT1G75770	-0.519367	3.00095	0.0605365	0.573554
AT3G10730	-0.339353	4.37826	0.0606824	0.57365	SAD1/UNC-84 domain protein 2
AT3G13910	-0.575422	1.60059	0.0606473	0.57365	Protein of unknown function (DUF3511)
AT4G29100	0.285023	5.1678	0.0606624	0.57365	basic helix-loop-helix (bHLH) DNA-binding superfamily protein
AT5G08610	0.316387	6.29023	0.0606208	0.57365	P-loop containing nucleoside triphosphate hydrolases superfamily protein
AT1G15750	0.339288	6.36917	0.0607334	0.573812	Transducin family protein / WD-40 repeat family protein
AT1G08900	-0.48863	3.34888	0.0608606	0.574052	Major facilitator superfamily protein
AT1G09690	-0.34982	7.9171	0.0608368	0.574052	Translation protein SH3-like family protein
AT2G19690	-0.707229	0.945538	0.0608263	0.574052	phospholipase A2-beta
AT3G09630	-0.379719	7.93986	0.0609795	0.574852	Ribosomal protein L4/L1 family
AT3G12210	-0.433435	3.79785	0.0610883	0.575557	DNA binding
AT1G09575	-1.1756	1.44833	0.0611296	0.575581	Protein of unknown function (DUF607)
AT3G08943	-0.395512	3.98916	0.0611589	0.575581	ARM repeat superfamily protein
AT2G35390	0.341595	4.98008	0.0612332	0.575657	Phosphoribosyltransferase family protein
AT5G49910	0.407558	8.93404	0.0612351	0.575657	chloroplast heat shock protein 70-2
AT1G20380	0.662732	2.08548	0.0616201	0.575756	Prolyl oligopeptidase family protein
AT1G80460	-0.2993	6.80593	0.061588	0.575756	Actin-like ATPase superfamily protein
AT2G39190	0.30842	6.19415	0.0614438	0.575756	Protein kinase superfamily protein
AT3G05600	0.594072	3.0274	0.0615281	0.575756	alpha/beta-Hydrolases superfamily protein
AT3G06670	0.311036	5.93656	0.0613797	0.575756	binding
AT3G52250	0.393754	5.38805	0.0616173	0.575756	Duplicated homeodomain-like superfamily protein
AT4G08980	0.327719	4.71392	0.0615281	0.575756	F-BOX WITH WD-40 2
AT4G20330	0.328338	4.22521	0.0616145	0.575756	Transcription initiation factor TFIIE, beta subunit
AT5G11170	0.3045	6.10768	0.0615541	0.575756	DEAD/DEAH box RNA helicase family protein
AT5G13150	0.687521	1.19735	0.0615483	0.575756	exocyst subunit exo70 family protein C1
AT5G60450	0.410074	3.78719	0.0614782	0.575756	auxin response factor 4
AT1G22360	-0.351945	5.32832	0.061735	0.57584	UDP-glucosyl transferase 85A2
AT1G71865	-0.466853	2.44129	0.0616831	0.57584
AT3G21660	1.3342	1.91304	0.0617259	0.57584	UBX domain-containing protein
AT3G47380	-0.790631	1.5663	0.0617992	0.57584	Plant invertase/pectin methylesterase inhibitor superfamily protein
AT5G19220	0.348179	7.20293	0.0617706	0.57584	ADP glucose pyrophosphorylase large subunit 1
AT2G36130	-0.330612	4.50163	0.0620283	0.577656	Cyclophilin-like peptidyl-prolyl cis-trans isomerase family protein
AT3G01670	0.358928	4.89789	0.0621425	0.5784
AT1G31330	0.429749	12.4494	0.0622268	0.578427	photosystem I subunit F
AT2G38695	-0.613416	1.57953	0.0621937	0.578427
AT2G46170	-0.297688	4.75686	0.062248	0.578427	Reticulon family protein
AT5G63400	-0.344119	6.21354	0.0623287	0.578859	adenylate kinase 1
AT2G41180	-0.618767	2.12695	0.0624053	0.579252	VQ motif-containing protein
AT2G42680	-0.281947	6.17832	0.0624617	0.579343	multiprotein bridging factor 1A
AT5G23210	-0.357858	6.79804	0.0624836	0.579343	serine carboxypeptidase-like 34
AT5G24210	-0.40799	5.5085	0.0625212	0.579374	alpha/beta-Hydrolases superfamily protein
AT1G05070	-0.469451	3.97955	0.0626422	0.580178	Protein of unknown function (DUF1068)
AT1G19610	-1.00521	2.41857	0.0626828	0.580236	Arabidopsis defensin-like protein
AT5G24400	0.296668	5.08561	0.0627325	0.580379	NagB/RpiA/CoA transferase-like superfamily protein
AT5G51150	-0.429739	3.8058	0.0629761	0.582314	Mitochondrial import inner membrane translocase subunit Tim17/Tim22/Tim23 family protein
AT1G36940	-0.691849	2.39411	0.0631498	0.582967
AT1G45050	-0.411423	3.48311	0.0632132	0.582967	Ubiquitin-conjugating enzyme family protein
AT1G58380	-0.318205	6.00041	0.06326	0.582967	Ribosomal protein S5 family protein
AT1G62370	-0.724665	1.71463	0.0632103	0.582967	RING/U-box superfamily protein
AT1G71870	-0.625601	1.55715	0.0632546	0.582967	MATE efflux family protein
AT2G22660	0.354312	6.16223	0.063288	0.582967	Protein of unknown function (duplicated DUF1399)
AT3G44200	0.293819	5.18886	0.0631364	0.582967	NIMA (never in mitosis, gene A)-related 6
AT4G10310	0.498935	2.30105	0.0633299	0.583035	high-affinity K+ transporter 1
AT4G17770	0.467482	3.95706	0.0634335	0.583671	trehalose phosphatase/synthase 5
AT1G27300	-0.375364	4.25198	0.0635526	0.583814
AT2G30860	-0.497433	8.761	0.0635302	0.583814	glutathione S-transferase PHI 9
AT5G57570	-0.798541	0.78359	0.0634908	0.583814	GCK domain-containing protein
AT1G31070	0.32227	4.78487	0.0636053	0.583981	N-acetylglucosamine-1-phosphate uridylyltransferase 1
AT1G08390	-0.662478	1.24563	0.0638308	0.584148
AT1G28410	-0.431752	2.7443	0.0638205	0.584148
AT3G17390	-0.415074	7.70856	0.0637831	0.584148	S-adenosylmethionine synthetase family protein
AT3G25910	-0.304624	5.67412	0.0637045	0.584148	Protein of unknown function (DUF1644)
AT3G52470	-0.420181	5.686	0.0638015	0.584148	Late embryogenesis abundant (LEA) hydroxyproline-rich glycoprotein family
AT5G64060	0.800245	0.463854	0.0637636	0.584148	NAC domain containing protein 103
AT1G17630	-0.650615	1.2512	0.0639239	0.584369	Pentatricopeptide repeat (PPR-like) superfamily protein
AT2G47210	0.306533	4.62381	0.0638952	0.584369	myb-like transcription factor family protein
AT1G29340	-0.351135	6.27485	0.0640041	0.584721	plant U-box 17
AT4G02120	0.343332	4.85453	0.0641008	0.584721	CTP synthase family protein
AT4G25650	0.3459	7.42568	0.0640537	0.584721	ACD1-like
AT5G59320	0.49394	3.34152	0.0640984	0.584721	lipid transfer protein 3
AT2G46090	-0.464309	3.14793	0.0641749	0.584873	Diacylglycerol kinase family protein
AT3G46510	-0.296394	5.1098	0.0641866	0.584873	plant U-box 13
AT1G02690	0.416819	3.917	0.0646261	0.586343	importin alpha isoform 6
AT1G69070	-0.318785	5.39881	0.064476	0.586343
AT3G07790	-0.378107	5.34097	0.0645684	0.586343	DGCR14-related
AT3G17850	0.332593	5.82731	0.0646802	0.586343	Protein kinase superfamily protein
AT3G55420	-0.50374	2.63884	0.0644112	0.586343
AT4G20060	0.667436	1.55956	0.0646877	0.586343	ARM repeat superfamily protein
AT4G29750	0.311042	5.67541	0.0647293	0.586343	CRS1 / YhbY (CRM) domain-containing protein
AT5G04870	-0.394696	5.34481	0.0646054	0.586343	calcium dependent protein kinase 1
AT5G20070	0.294156	5.49313	0.0646971	0.586343	nudix hydrolase homolog 19
AT5G49880	0.359757	3.93762	0.0644869	0.586343	mitotic checkpoint family protein
AT5G57770	0.607487	1.59528	0.0646198	0.586343	Plant protein of unknown function (DUF828) with plant pleckstrin homology-like region
AT1G01960	0.265937	5.82721	0.0648336	0.586713	SEC7-like guanine nucleotide exchange family protein
AT3G58600	0.311455	4.55409	0.0648395	0.586713	Adaptin ear-binding coat-associated protein 1 NECAP-1
AT2G15050	-0.619072	4.66742	0.0648874	0.586832	lipid transfer protein
AT1G44350	-0.493599	4.41478	0.0650232	0.587432	IAA-leucine resistant (ILR)-like gene 6
AT5G39970	0.731611	1.79745	0.0650072	0.587432	catalytics
AT2G39710	-0.457142	3.23499	0.0650846	0.587673	Eukaryotic aspartyl protease family protein
AT1G49430	0.322021	5.46721	0.0652238	0.588616	long-chain acyl-CoA synthetase 2
AT1G23180	0.333081	5.03493	0.0655741	0.591146	ARM repeat superfamily protein
AT5G02490	-0.442701	4.40436	0.0655741	0.591146	Heat shock protein 70 (Hsp 70) family protein
AT1G07080	-0.362734	6.64705	0.0658393	0.591679	Thioredoxin superfamily protein
AT1G69740	-0.326079	7.61896	0.0657159	0.591679	Aldolase superfamily protein
AT4G01650	-0.467292	3.31977	0.0657811	0.591679	Polyketide cyclase / dehydrase and lipid transport protein
AT4G16410	-0.570888	3.78928	0.0658432	0.591679
AT4G18425	0.723949	1.82907	0.0657839	0.591679	Protein of unknown function (DUF679)
AT5G48660	-0.710111	0.866385	0.0657217	0.591679	B-cell receptor-associated protein 31-like
AT1G65970	0.599112	4.14249	0.0659804	0.592556	thioredoxin-dependent peroxidase 2
AT3G61460	-0.380504	4.95672	0.0660109	0.592556	brassinosteroid-responsive RING-H2
AT5G07120	0.359921	4.32964	0.0660923	0.592972	sorting nexin 2B
AT2G32580	-0.34313	4.26608	0.0661471	0.592997	Protein of unknown function (DUF1068)
AT4G28370	0.476774	3.6402	0.0661652	0.592997	RING/U-box superfamily protein
AT1G01110	0.565229	1.80711	0.0665722	0.593031	IQ-domain 18
AT1G08780	-0.456057	3.51341	0.0665898	0.593031	ABI3-interacting protein 3
AT1G15400	-0.340372	4.79606	0.0665309	0.593031
AT1G21190	-0.374415	3.72244	0.0664588	0.593031	Small nuclear ribonucleoprotein family protein
AT1G74340	-0.349497	4.05548	0.0664624	0.593031	dolichol phosphate-mannose biosynthesis regulatory protein-related
AT1G78240	-0.33237	5.28468	0.0664482	0.593031	S-adenosyl-L-methionine-dependent methyltransferases superfamily protein
AT2G21960	0.36382	6.69182	0.0665774	0.593031
AT3G48170	0.2747	5.68054	0.0662231	0.593031	aldehyde dehydrogenase 10A9
AT3G63470	0.580871	2.17797	0.0665084	0.593031	serine carboxypeptidase-like 40
AT5G42090	-0.301983	4.86854	0.066512	0.593031	Lung seven transmembrane receptor family protein
AT5G54670	0.527215	3.62676	0.0665732	0.593031	kinesin 3
AT5G62500	0.606087	2.13132	0.0664045	0.593031	end binding protein 1B
AT3G25470	0.311397	4.85802	0.0668051	0.594635	bacterial hemolysin-related
AT3G10120	-0.606291	1.60454	0.0669229	0.594745
AT3G11080	-0.522599	1.55216	0.0669068	0.594745	receptor like protein 35
AT5G63120	-0.489366	2.92731	0.0668931	0.594745	P-loop containing nucleoside triphosphate hydrolases superfamily protein
AT2G47440	-0.461036	5.45654	0.066982	0.594757	Tetratricopeptide repeat (TPR)-like superfamily protein
AT4G37540	-0.44398	5.8391	0.0669945	0.594757	LOB domain-containing protein 39
AT3G44530	0.38964	3.53933	0.0671136	0.595501	homolog of histone chaperone HIRA
AT5G20900	-0.352685	5.25699	0.0672423	0.596331	jasmonate-zim-domain protein 12
AT5G60190	-0.552061	2.04517	0.0672866	0.596411	Cysteine proteinases superfamily protein
AT1G04810	0.302791	5.40638	0.067462	0.59706	26S proteasome regulatory complex, non-ATPase subcomplex, Rpn2/Psmd1 subunit
AT4G28270	-0.358486	5.64021	0.0674471	0.59706	RING membrane-anchor 2
AT5G17980	-0.763102	1.01188	0.0674659	0.59706	C2 calcium/lipid-binding plant phosphoribosyltransferase family protein
AT2G32700	0.305949	6.12456	0.0675962	0.597214	LEUNIG_homolog
AT3G50260	-0.828763	2.64766	0.0675872	0.597214	cooperatively regulated by ethylene and jasmonate 1
AT4G18590	-0.48512	2.11048	0.0676773	0.597214	Nucleic acid-binding, OB-fold-like protein
AT4G19239	-0.516371	2.12909	0.0676951	0.597214
AT5G21990	0.301618	5.38468	0.0676791	0.597214	Tetratricopeptide repeat (TPR)-like superfamily protein
AT5G52040	-0.31265	7.02733	0.0675307	0.597214	RNA-binding (RRM/RBD/RNP motifs) family protein
AT2G19680	-0.464708	3.38936	0.0677684	0.597245	Mitochondrial ATP synthase subunit G protein
AT3G50530	0.336864	5.14621	0.0677692	0.597245	CDPK-related kinase
AT1G76670	-0.298444	5.28802	0.0678511	0.597344	Nucleotide-sugar transporter family protein
AT3G02790	-0.545708	2.34609	0.067846	0.597344	zinc finger (C2H2 type) family protein
AT1G61560	0.498384	2.98121	0.0679966	0.598313	Seven transmembrane MLO family protein
AT5G22270	-0.687773	3.23487	0.0680418	0.5984
AT1G55490	0.327044	8.6105	0.0681004	0.598604	chaperonin 60 beta
AT2G42230	0.323539	3.9272	0.0682977	0.598789	C-CAP/cofactor C-like domain-containing protein
AT3G58500	0.306099	6.74552	0.0682985	0.598789	protein phosphatase 2A-4
AT4G35250	0.365183	7.99349	0.0682199	0.598789	NAD(P)-binding Rossmann-fold superfamily protein
AT5G57110	0.414758	5.51618	0.0681769	0.598789	autoinhibited Ca2+ -ATPase, isoform 8
AT5G65170	-0.474021	2.80427	0.0682667	0.598789	VQ motif-containing protein
AT2G41080	-0.551976	1.97636	0.0683854	0.599241	Tetratricopeptide repeat (TPR)-like superfamily protein
AT4G13710	-0.510265	2.00575	0.0684792	0.599548	Pectin lyase-like superfamily protein
AT4G20860	-0.894854	6.52512	0.0684914	0.599548	FAD-binding Berberine family protein
AT1G64490	-0.503226	2.315	0.0686123	0.600078	DEK, chromatin associated protein
AT2G37970	-0.354094	7.05609	0.0686229	0.600078	SOUL heme-binding family protein
AT3G24200	0.353792	3.88692	0.0688217	0.601505	FAD/NAD(P)-binding oxidoreductase family protein
AT5G18540	-0.518388	2.26797	0.0688713	0.601628
AT1G75490	-0.938708	3.31799	0.068916	0.601707	Integrase-type DNA-binding superfamily protein
AT1G64960	0.430929	3.23063	0.0689851	0.602	ARM repeat superfamily protein
AT1G75010	0.406485	4.21663	0.0692327	0.602606	GTP binding
AT3G46940	-0.588741	2.86112	0.0692012	0.602606	DUTP-PYROPHOSPHATASE-LIKE 1
AT3G52525	0.683398	1.30258	0.0690987	0.602606	ovate family protein 6
AT5G02502	-0.499128	2.00539	0.0692166	0.602606	Oligosaccaryltransferase
AT5G37770	-0.755965	4.61886	0.069134	0.602606	EF hand calcium-binding protein family
AT3G17670	-0.52249	2.77359	0.0692695	0.602616	tetratricopeptide repeat (TPR)-containing protein
AT3G60190	0.318643	5.9503	0.0694108	0.603535	DYNAMIN-like 1E
AT3G61630	-0.53034	2.18641	0.0694896	0.603599	cytokinin response factor 6
AT4G11360	-0.448462	6.55047	0.0694877	0.603599	RING-H2 finger A1B
AT2G34460	0.341568	6.55006	0.0695886	0.604149	NAD(P)-binding Rossmann-fold superfamily protein
AT5G17650	-0.42299	3.8594	0.0697232	0.605007	glycine/proline-rich protein
AT1G04820	-0.302778	7.55153	0.0699518	0.605438	tubulin alpha-4 chain
AT1G54370	-0.36828	4.25065	0.0698381	0.605438	sodium hydrogen exchanger 5
AT2G34430	-0.363986	10.6603	0.0699444	0.605438	light-harvesting chlorophyll-protein complex II subunit B1
AT3G08710	-0.331123	3.93095	0.0699261	0.605438	thioredoxin H-type 9
AT3G26100	0.373435	5.36834	0.0698456	0.605438	Regulator of chromosome condensation (RCC1) family protein
AT5G55180	-0.54966	6.75885	0.0699912	0.605469	O-Glycosyl hydrolases family 17 protein
AT1G31180	0.316987	5.33572	0.070098	0.605773	isopropylmalate dehydrogenase 3
AT3G24080	-0.34249	7.06751	0.0700648	0.605773	KRR1 family protein
AT1G06690	0.349986	5.94937	0.0704861	0.605886	NAD(P)-linked oxidoreductase superfamily protein
AT1G14140	-0.461507	2.7495	0.0705051	0.605886	Mitochondrial substrate carrier family protein
AT3G01180	0.324236	4.94698	0.070476	0.605886	starch synthase 2
AT3G16080	-0.35224	6.01327	0.0702442	0.605886	Zinc-binding ribosomal protein family protein
AT3G51150	-0.344115	4.36068	0.0702601	0.605886	ATP binding microtubule motor family protein
AT3G62650	-0.403481	5.51503	0.0703475	0.605886
AT4G16440	0.41257	3.11128	0.0703661	0.605886	ferredoxin hydrogenases
AT4G18240	0.327558	6.62891	0.0704759	0.605886	starch synthase 4
AT5G20280	0.294326	6.86938	0.070456	0.605886	sucrose phosphate synthase 1F
AT5G21090	-0.379337	7.63751	0.0702828	0.605886	Leucine-rich repeat (LRR) family protein
AT5G41920	-0.515116	2.73671	0.0704916	0.605886	GRAS family transcription factor
AT1G13440	-0.333525	9.7867	0.0707585	0.606223	glyceraldehyde-3-phosphate dehydrogenase C2
AT1G17940	0.485235	3.14386	0.0706563	0.606223	Endosomal targeting BRO1-like domain-containing protein
AT1G31230	0.310455	5.35241	0.0706059	0.606223	aspartate kinase-homoserine dehydrogenase i
AT3G16850	-0.365735	6.37329	0.0706206	0.606223	Pectin lyase-like superfamily protein
AT3G56040	0.323534	6.69664	0.0707583	0.606223	UDP-glucose pyrophosphorylase 3
AT4G11211	-0.639493	3.94822	0.0707594	0.606223
AT2G43510	-0.533328	3.85002	0.070919	0.606361	trypsin inhibitor protein 1
AT4G13580	-0.729371	2.51012	0.0708134	0.606361	Disease resistance-responsive (dirigent-like protein) family protein
AT5G03905	0.426014	3.01132	0.0708962	0.606361	Iron-sulphur cluster biosynthesis family protein
AT5G22130	-0.531742	2.21925	0.0708912	0.606361	mannosyltransferase family protein
AT1G62020	0.316548	5.48008	0.0709573	0.606382	Coatomer, alpha subunit
AT3G04340	0.335585	7.0121	0.0710203	0.606614	FtsH extracellular protease family
AT3G56490	-0.302142	5.58368	0.0710579	0.606628	HIS triad family protein 3
AT5G15830	-0.501252	2.83212	0.0711027	0.606705	basic leucine-zipper 3
AT1G30730	-0.809332	5.11766	0.0713198	0.607026	FAD-binding Berberine family protein
AT1G78000	0.443109	4.61353	0.0712681	0.607026	sulfate transporter 1;2
AT3G45210	-0.449819	3.77132	0.0711774	0.607026	Protein of unknown function, DUF584
AT4G14330	0.357126	4.62853	0.071288	0.607026	P-loop containing nucleoside triphosphate hydrolases superfamily protein
AT4G26500	-0.353227	4.61018	0.0712694	0.607026	chloroplast sulfur E
AT2G40765	-0.445554	4.428	0.071423	0.607337
AT3G12930	-0.337553	4.77806	0.0714282	0.607337	Lojap-related protein
AT4G19610	0.308014	4.61873	0.0715012	0.607652	nucleotide binding;nucleic acid binding;RNA binding
AT2G25964	-0.442006	4.28546	0.071579	0.607731
AT2G29500	-0.641039	6.00909	0.0715823	0.607731	HSP20-like chaperones superfamily protein
AT1G32410	-0.309126	4.87262	0.0716196	0.607742	Vacuolar protein sorting 55 (VPS55) family protein
[truncated: 14,922 more rows]
