# Supplementary material for: Genome-Wide Analysis of PAPS1-Dependent Polyadenylation Identifies Novel Roles for Functionally Specialized Poly(A) Polymerases in Arabidopsis thaliana
Source: PLoS Genet. 2015 Aug 25;11(8):e1005474. doi: 10.1371/journal.pgen.1005474 (PMC4549238; doi:10.1371/journal.pgen.1005474)
Supplement: S4 Table — Median(log2FC): median of the log2 fold-change of long/short ratios between paps1-1 mutant and wild-type samples over the category in question; WT p-value: uncorrected p-value of Wilcoxon rank-sum test; WT BH p-value: p-value of Wilcoxon rank-sum test with Benjamini-Hochberg correction (XLSX) [file pgen.1005474.s011.xlsx]

## Sheet: S4 Table
S4 Table: List of MapMan categories with significantly different poly(A)-tail length changes in paps1-1 versus wild type than the transcriptome-wide background
Median(log2FC): median of the log2 fold-change of long/short ratios between paps1-1 mutant and wild-type samples over the category in question
WT BH p-value: p-value of Wilcoxon rank-sum test with Benjamini-Hochberg correction
Bin	Name	Members	Median(log2FC)	WT p-value	WT BH p-value
29.2.1.2	protein.synthesis.ribosomal protein.eukaryotic	231	-0.290106	1.45924e-45	5.12195e-43
29.2.1	protein.synthesis.ribosomal protein	348	-0.24982	3.19515e-43	5.60749e-41
35.2	not assigned.unknown	3480	-0.0836746	5.68707e-31	6.65387e-29
29.2	protein.synthesis	489	-0.204154	1.60141e-30	1.40524e-28
29.2.1.2.2	protein.synthesis.ribosomal protein.eukaryotic.60S subunit	144	-0.292449	6.15901e-29	4.32363e-27
35	not assigned	5287	-0.0575444	1.5438e-18	9.03125e-17
29.2.1.2.1	protein.synthesis.ribosomal protein.eukaryotic.40S subunit	87	-0.287149	5.21875e-18	2.61683e-16
31	cell	629	0.0315304	1.47658e-11	6.47851e-10
28	DNA	430	0.0493989	2.85222e-10	1.11236e-08
2	major CHO metabolism	80	0.158824	1.11722e-09	3.92144e-08
29.1	protein.aa activation	73	0.17594	5.80757e-09	1.85314e-07
31.2	cell.division	89	0.0869101	9.37884e-09	2.74331e-07
28.1.3	DNA.synthesis/chromatin structure.histone	37	-0.300946	6.53014e-07	1.76314e-05
27.3.44	RNA.regulation of transcription.Chromatin Remodeling Factors	35	0.230717	8.31343e-07	2.0843e-05
16.1	secondary metabolism.isoprenoids	66	0.0982783	2.77356e-06	6.49013e-05
26.18	misc.invertase/pectin methylesterase inhibitor family protein	18	-0.393527	4.1279e-06	9.05558e-05
2.2	major CHO metabolism.degradation	50	0.135018	9.94883e-06	0.000205414
31.1	cell.organisation	303	0.0231894	1.21316e-05	0.000236567
2.1	major CHO metabolism.synthesis	30	0.292171	2.31277e-05	0.000427254
34.16	transport.ABC transporters and multidrug resistance systems	85	0.083309	3.52539e-05	0.000618705
28.1	DNA.synthesis/chromatin structure	290	0.0377901	5.143e-05	0.000841475
29.5.7	protein.degradation.metalloprotease	32	0.146465	5.2742e-05	0.000841475
SAUR	small auxin-upregulated mRNAs (SAUR)	22	-0.325884	5.67383e-05	0.000841784
2.2.2	major CHO metabolism.degradation.starch	24	0.187657	5.79316e-05	0.000841784
30.8	signalling.misc	12	-0.505187	5.99561e-05	0.000841784
2.1.2	major CHO metabolism.synthesis.starch	23	0.307592	6.31081e-05	0.00085196
29.4	protein.postranslational modification	528	0.00826251	7.80489e-05	0.00101464
30.11	signalling.light	92	0.0924849	8.95344e-05	0.00112238
20.2.99	stress.abiotic.unspecified	60	-0.193965	0.000113545	0.00137429
28.99	DNA.unspecified	77	0.0715003	0.000121052	0.00141631
21.4	redox.glutaredoxins	25	-0.230634	0.000165671	0.0018529
17.5.2	hormone metabolism.ethylene.signal transduction	23	-0.292139	0.000168925	0.0018529
1.3	PS.calvin cyle	33	0.126801	0.000396714	0.00421959
16	secondary metabolism	271	0.0132463	0.000486408	0.00490587
20	stress	574	-0.0785535	0.00048919	0.00490587
28.2	DNA.repair	63	0.0981804	0.000627506	0.00611818
20.2	stress.abiotic	320	-0.0812056	0.000843489	0.00800175
13.1	amino acid metabolism.synthesis	163	0.0417345	0.000955574	0.00882649
27.3.3	RNA.regulation of transcription.AP2/EREBP, APETALA2/Ethylene-responsive element binding protein family	60	-0.149126	0.00138157	0.0124342
29.2.1.1	protein.synthesis.ribosomal protein.prokaryotic	107	-0.117818	0.00142098	0.0124691
17.5	hormone metabolism.ethylene	63	-0.188117	0.00161923	0.0138622
23.1	nucleotide metabolism.synthesis	32	0.0860843	0.00201414	0.016589
3.6	minor CHO metabolism.callose	13	0.143528	0.00203228	0.016589
32	micro RNA, natural antisense etc	32	-0.285319	0.00263563	0.0210252
10.5.1	cell wall.cell wall proteins.AGPs	35	-0.1463	0.00328905	0.0256546
29.3.4.2	protein.targeting.secretory pathway.golgi	17	0.119328	0.00354679	0.0270636
13	amino acid metabolism	233	0.0215774	0.00382997	0.0286026
17.2.2	hormone metabolism.auxin.signal transduction	19	0.153318	0.00406669	0.0297377
27.3.54	RNA.regulation of transcription.Histone acetyltransferases	15	0.148566	0.00484212	0.0346854
27	RNA	1971	-0.0174139	0.00528295	0.0361357
17	hormone metabolism	320	-0.0738908	0.00533838	0.0361357
10.1	cell wall.precursor synthesis	48	0.08249	0.00535343	0.0361357
29.3.3	protein.targeting.chloroplast	31	0.0894994	0.00600375	0.0397607
30.2.25	signalling.receptor kinases.wall associated kinase	12	-0.245078	0.00634622	0.0412504
5	fermentation	12	0.0982191	0.00686772	0.0432046
13.1.1	amino acid metabolism.synthesis.central amino acid metabolism	17	0.152633	0.00689305	0.0432046
30.4	signalling.phosphinositides	47	0.0581399	0.00704669	0.0433928
31.4	cell.vesicle transport	131	0.0152934	0.00765375	0.0463184
16.1.4	secondary metabolism.isoprenoids.carotenoids	14	0.119581	0.00778637	0.0463223
30.4.1	signalling.phosphinositides.phosphatidylinositol-4-phosphate 5-kinase	16	0.111519	0.00847326	0.0495686
23.2	nucleotide metabolism.degradation	25	0.119415	0.00920049	0.0529405
35.1.5	not assigned.no ontology.pentatricopeptide (PPR) repeat-containing protein	324	0.00259452	0.00949009	0.0537261
23	nucleotide metabolism	138	0.0137561	0.00978154	0.0544972
27.3.6	RNA.regulation of transcription.bHLH,Basic Helix-Loop-Helix family	91	0.0247233	0.0104884	0.0575225
29.2.1.1.3.2	protein.synthesis.ribosomal protein.prokaryotic.unknown organellar.50S subunit	30	-0.180838	0.0108007	0.058324
17.6.1	hormone metabolism.gibberelin.synthesis-degradation	12	-0.216903	0.0124583	0.0662553
27.3.7	RNA.regulation of transcription.C2C2(Zn) CO-like, Constans-like zinc finger family	24	-0.128159	0.01458	0.0763816
8.2	TCA / org. transformation.other organic acid transformaitons	18	0.129903	0.0181618	0.0931086
23.1.2	nucleotide metabolism.synthesis.purine	15	0.0759178	0.0185527	0.0931086
26.21	misc.protease inhibitor/seed storage/lipid transfer protein (LTP) family protein	46	-0.201013	0.0186119	0.0931086
29.2.1.1.3	protein.synthesis.ribosomal protein.prokaryotic.unknown organellar	45	-0.144697	0.0188339	0.0931086
13.2.4	amino acid metabolism.degradation.branched-chain group	15	0.0712799	0.0194341	0.0947412
26.16	misc.myrosinases-lectin-jacalin	31	-0.130617	0.0200633	0.0964689
35.1.21	not assigned.no ontology.epsin N-terminal homology (ENTH) domain-containing protein	13	0.107151	0.0205213	0.0973376
9	mitochondrial electron transport / ATP synthesis	108	-0.110341	0.0217441	0.101762
30.2.11	signalling.receptor kinases.leucine rich repeat XI	26	-0.110801	0.0236964	0.108837
2.2.1	major CHO metabolism.degradation.sucrose	26	0.114896	0.0238759	0.108837
29.5.9	protein.degradation.AAA type	27	0.142987	0.0247792	0.110813
27.3	RNA.regulation of transcription	1505	-0.0185354	0.0249409	0.110813
29.5	protein.degradation	1084	-0.0114625	0.0256333	0.112466
29.2.1.1.2	protein.synthesis.ribosomal protein.prokaryotic.mitochondrion	12	-0.362003	0.0280081	0.121368
27.3.27	RNA.regulation of transcription.NAC domain transcription factor family	11	0.169126	0.028722	0.122653
10.7	cell wall.modification	46	-0.165756	0.0290033	0.122653
17.5.3	hormone metabolism.ethylene.induced-regulated-responsive-activated	17	-0.276695	0.0297104	0.123919
1.1	PS.lightreaction	100	-0.0854276	0.0302692	0.123919
34.2	transporter.sugars	50	-0.12458	0.0308126	0.123919
8	TCA / org. transformation	63	0.047941	0.0312724	0.123919
3.2	minor CHO metabolism.trehalose	15	0.0926293	0.0313581	0.123919
34.3	transport.amino acids	47	-0.119467	0.0314209	0.123919
10.6.3	cell wall.degradation.pectate lyases and polygalacturonases	41	-0.13112	0.0343312	0.133892
34.19.1	transport.Major Intrinsic Proteins.PIP	13	-0.193851	0.0379674	0.146446
29.3.4.3	protein.targeting.secretory pathway.vacuole	27	0.0894501	0.0388694	0.148295
1.1.1	PS.lightreaction.photosystem II	43	-0.124757	0.0399722	0.150863
10.5	cell wall.cell wall proteins	70	-0.108757	0.0430806	0.160486
13.1.6.1	amino acid metabolism.synthesis.aromatic aa.chorismate	12	0.0913945	0.0434363	0.160486
17.3	hormone metabolism.brassinosteroid	47	-0.109221	0.0440078	0.160904
27.3.11	RNA.regulation of transcription.C2H2 zinc finger family	71	-0.105609	0.045589	0.162877
17.4	hormone metabolism.cytokinin	17	0.0932361	0.0456592	0.162877
16.1.1	secondary metabolism.isoprenoids.non-mevalonate pathway	17	0.0765646	0.0459398	0.162877
31.3.1	cell.cycle.peptidylprolyl isomerase	30	-0.085805	0.0477066	0.166154
16.5.1.1.1	secondary metabolism.sulfur-containing.glucosinolates.synthesis.aliphatic	21	0.099808	0.0478106	0.166154
35.1	not assigned.no ontology	1807	-0.011443	0.0500794	0.168485
34.7	transport.phosphate	15	0.0888559	0.0500868	0.168485
27.3.52	RNA.regulation of transcription.Global transcription factor group	13	0.083043	0.0500941	0.168485
34.1	transport.nucleotides	14	-0.174363	0.0504014	0.168485
29.5.11.4.3.2	protein.degradation.ubiquitin.E3.SCF.FBOX	182	0.00953859	0.0517276	0.170537
3	minor CHO metabolism	97	0.0254233	0.051987	0.170537
17.6	hormone metabolism.gibberelin	26	-0.157332	0.054444	0.176815
10.2.1	cell wall.cellulose synthesis.cellulose synthase	18	0.0441746	0.0549082	0.176815
20.1.3	stress.biotic.signalling	15	0.239711	0.0578488	0.18459
35.1.40	not assigned.no ontology.glycine rich proteins	49	-0.146241	0.0596774	0.18871
34.14	transport.unspecified cations	33	0.0371196	0.0625582	0.19499
34.15	transport.potassium	34	0.0381882	0.0627746	0.19499
4.2	glycolysis.plastid branch	14	0.196293	0.0636185	0.195878
16.1	secondary metabolism.simple phenols	11	0.192265	0.0656729	0.200445
25	C1-metabolism	32	0.0593836	0.0706944	0.213615
19	tetrapyrrole synthesis	40	0.0401083	0.0718651	0.213615
34	transport	733	-0.0251897	0.0721416	0.213615
27.3.37	RNA.regulation of transcription.AS2,Lateral Organ Boundaries Gene Family	13	-0.301913	0.0724222	0.213615
2.2.2.1	major CHO metabolism.degradation.starch.starch cleavage	11	0.129794	0.0739331	0.216254
35.1.2	not assigned.no ontology.agenet domain-containing protein	12	0.14097	0.0787186	0.227485
29.5.11.4.2	protein.degradation.ubiquitin.E3.RING	315	-0.0735887	0.0796851	0.227485
13.2.6.3	amino acid metabolism.degradation.aromatic aa.tryptophan	13	-0.211111	0.08033	0.227485
13.1.3	amino acid metabolism.synthesis.aspartate family	46	0.0719115	0.0814477	0.227485
27.3.67	RNA.regulation of transcription.putative transcription regulator	138	0.0272663	0.0819324	0.227485
29.3.4.99	protein.targeting.secretory pathway.unspecified	47	-0.114776	0.0822127	0.227485
4	glycolysis	56	-0.000499756	0.0823095	0.227485
27.3.35	RNA.regulation of transcription.bZIP transcription factor family	48	0.0238144	0.0834646	0.228876
27.3.24	RNA.regulation of transcription.MADS box transcription factor family	13	-0.309607	0.0846982	0.230458
29.3.4.1	protein.targeting.secretory pathway.ER	14	-0.172868	0.0879072	0.237349
29.5.11.20	protein.degradation.ubiquitin.proteasom	58	0.00254426	0.0921728	0.246065
30.7	signalling.14-3-3 proteins	12	-0.178268	0.0925371	0.246065
27.3.4	RNA.regulation of transcription.ARF, Auxin Response Factor family	14	0.102386	0.0949924	0.250694
20.2.2	stress.abiotic.cold	14	-0.0785556	0.0967619	0.253458
16.8.1	secondary metabolism.flavonoids.anthocyanins	12	-0.188607	0.0978856	0.254502
29.2.1.1.1.1	protein.synthesis.ribosomal protein.prokaryotic.chloroplast.30S subunit	13	-0.158811	0.0991865	0.25576
27.1.2	RNA.processing.RNA helicase	31	0.0263886	0.0998264	0.25576
15	metal handling	65	0.0116173	0.103022	0.262033
29.5.11.3	protein.degradation.ubiquitin.E2	37	-0.111024	0.105472	0.266336
30.2.16	signalling.receptor kinases.Catharanthus roseus-like RLK1	12	-0.129895	0.108943	0.273135
9.1	mitochondrial electron transport / ATP synthesis.NADH-DH	35	-0.115985	0.110199	0.274325
33.99	development.unspecified	434	-0.00607581	0.112619	0.278375
17.2.3	hormone metabolism.auxin.induced-regulated-responsive-activated	68	-0.0801156	0.114169	0.279074
35.1.3	not assigned.no ontology.armadillo/beta-catenin repeat family protein	26	0.0392027	0.114546	0.279074
29.3.1	protein.targeting.nucleus	42	0.0304371	0.115287	0.279074
29.5.11.1	protein.degradation.ubiquitin.ubiquitin	23	-0.180018	0.11639	0.279729
20.2.1	stress.abiotic.heat	150	-0.0666533	0.117151	0.279729
12.2	N-metabolism.ammonia metabolism	11	0.120931	0.123475	0.291263
27.3.26	RNA.regulation of transcription.MYB-related transcription factor family	37	-0.0933147	0.123642	0.291263
34.1.1	transport.p- and v-ATPases.H+-transporting two-sector ATPase	18	-0.116658	0.128915	0.301662
28.1.1	DNA.synthesis/chromatin structure.retrotransposon/transposase	48	0.0371245	0.130694	0.30214
29.5.5	protein.degradation.serine protease	65	0.0132485	0.130841	0.30214
17.3.1	hormone metabolism.brassinosteroid.synthesis-degradation	28	-0.115361	0.132422	0.303446
21.6	redox.dismutases and catalases	12	0.0503837	0.133925	0.303446
30.2.99	signalling.receptor kinases.misc	47	0.00727299	0.134068	0.303446
1.1.1.1	PS.lightreaction.photosystem II.LHC-II	15	-0.124757	0.136413	0.303446
13.1.5.3	amino acid metabolism.synthesis.serine-glycine-cysteine group.cysteine	14	0.0208816	0.136569	0.303446
26.8	misc.nitrilases, *nitrile lyases, berberine bridge enzymes, reticuline oxidases, troponine reductases	46	-0.0791882	0.136594	0.303446
21.2.2	redox.ascorbate and glutathione.glutathione	11	0.046156	0.139751	0.308506
16.8.3	secondary metabolism.flavonoids.dihydroflavonols	18	0.0259007	0.141472	0.310354
1.1.1.2	PS.lightreaction.photosystem II.PSII polypeptide subunits	28	-0.126599	0.145994	0.318285
29.5.11.4.3	protein.degradation.ubiquitin.E3.SCF	194	-0.00469266	0.14915	0.323159
14	S-assimilation	12	0.0839629	0.151276	0.325753
9.1.2	mitochondrial electron transport / ATP synthesis.NADH-DH.localisation not clear	27	-0.130868	0.152664	0.326739
21	redox	169	-0.0721111	0.158539	0.337255
11.9.3.1	lipid metabolism.lipid degradation.lysophospholipases.phospholipase D	11	0.0503373	0.163952	0.346671
17.1.3	hormone metabolism.abscisic acid.induced-regulated-responsive-activated	19	-0.0958894	0.168361	0.352762
33.2	development.late embryogenesis abundant	14	-0.172078	0.168844	0.352762
34.12	transport.metal	60	0.0180924	0.171353	0.355888
17.3.2	hormone metabolism.brassinosteroid.signal transduction	17	-0.105457	0.173939	0.359132
29.2.1.1.1	protein.synthesis.ribosomal protein.prokaryotic.chloroplast	50	-0.102143	0.176068	0.35939
29.3	protein.targeting	234	-0.00334448	0.176111	0.35939
17.3.1.2	hormone metabolism.brassinosteroid.synthesis-degradation.sterols	17	-0.130485	0.178515	0.360725
20.2.4	stress.abiotic.touch/wounding	11	-0.114969	0.178821	0.360725
33.1	development.storage proteins	13	-0.232932	0.187731	0.376535
26.22	misc.short chain dehydrogenase/reductase (SDR)	34	0.0189626	0.191676	0.382262
9.7	mitochondrial electron transport / ATP synthesis.cytochrome c oxidase	22	-0.151002	0.194166	0.382911
26.7	misc.oxidases - copper, flavone etc.	66	0.0160263	0.194183	0.382911
20.1	stress.biotic	248	-0.0714447	0.204244	0.400501
26	misc	882	-0.0455827	0.20783	0.405268
27.3.69	RNA.regulation of transcription.SET-domain transcriptional regulator family	31	0.0859894	0.214133	0.415252
27.3.57	RNA.regulation of transcription.JUMONJI family	11	0.0938144	0.215665	0.415926
29.4.1	protein.postranslational modification.kinase	107	-0.0198236	0.217292	0.416774
35.1.20	not assigned.no ontology.formin homology 2 domain-containing protein	14	0.0215817	0.221858	0.420709
26.9	misc.glutathione S transferases	41	-0.096497	0.222753	0.420709
30.6	signalling.MAP kinases	37	0.0311436	0.22294	0.420709
12	N-metabolism	23	0.061586	0.224856	0.422056
29.5.1	protein.degradation.subtilases	22	-0.129226	0.227455	0.424664
10.6	cell wall.degradation	61	-0.0937039	0.229895	0.426858
16.5.1.1	secondary metabolism.sulfur-containing.glucosinolates.synthesis	27	0.0955746	0.231063	0.426858
13.1.4	amino acid metabolism.synthesis.branched chain group	17	0.0751541	0.233764	0.429587
1.2	PS.photorespiration	21	0.0237711	0.241359	0.43935
27.3.68	RNA.regulation of transcription.PWWP domain protein	11	0.0416324	0.24158	0.43935
17.7	hormone metabolism.jasmonate	24	-0.133866	0.251414	0.454877
34.99	transport.misc	113	-0.00876858	0.25614	0.461051
33.3	development.squamosa promoter binding like (SPL)	11	0.00476991	0.258803	0.463469
27.4	RNA.RNA binding	154	-0.0178588	0.265956	0.473861
18	Co-factor and vitamine metabolism	74	-0.00218527	0.269326	0.477442
20.2.3	stress.abiotic.drought/salt	60	-0.0484366	0.27273	0.481046
27.3.25	RNA.regulation of transcription.MYB domain transcription factor family	74	0.00806082	0.274428	0.481621
10.2	cell wall.cellulose synthesis	33	0.0278608	0.277691	0.484698
13.2.6	amino acid metabolism.degradation.aromatic aa	21	-0.156669	0.280182	0.484698
13.1.6	amino acid metabolism.synthesis.aromatic aa	43	0.0153446	0.281356	0.484698
29.5.4	protein.degradation.aspartate protease	28	-0.0819904	0.281705	0.484698
27.2	RNA.transcription	76	-0.00617741	0.290528	0.497229
27.3.40	RNA.regulation of transcription.Aux/IAA family	17	-0.0880973	0.292048	0.497229
30.11.1	signalling.light.COP9 signalosome	12	0.0924849	0.293238	0.497229
27.1.19	RNA.processing.ribonucleases	36	-0.00696546	0.298627	0.503934
10.6.2	cell wall.degradation.mannan-xylose-arabinose-fucose	13	0.0204471	0.303202	0.509206
30.3	signalling.calcium	164	-0.053708	0.309232	0.516859
11.3	lipid metabolism.Phospholipid synthesis	45	0.00257974	0.311272	0.517803
26.28	misc.GDSL-motif lipase	40	-0.0929345	0.313354	0.518808
27.3.62	RNA.regulation of transcription.Nucleosome/chromatin assembly factor group	13	-0.169886	0.332541	0.547989
16.1.2	secondary metabolism.isoprenoids.mevalonate pathway	15	0.0291952	0.335628	0.550493
23.4	nucleotide metabolism.phosphotransfer and pyrophosphatases	28	-0.0952299	0.348244	0.566207
30	signalling	884	-0.0202196	0.348558	0.566207
29.7	protein.glycosylation	39	-0.0463403	0.350953	0.566207
27.3.30	RNA.regulation of transcription.Trihelix, Triple-Helix transcription factor family	25	-0.0370447	0.351661	0.566207
35.1.19	not assigned.no ontology.C2 domain-containing protein	32	0.0269368	0.357232	0.57255
33	development	473	-0.00642918	0.362053	0.577639
24	Biodegradation of Xenobiotics	21	-0.0486139	0.367842	0.58422
10	cell wall	321	-0.0617009	0.371849	0.586534
26.11	misc	13	0.0293244	0.374313	0.586534
26.11.1	misc.alcohol dehydrogenases	13	0.0293244	0.374313	0.586534
26.12	misc.peroxidases	48	-0.00350312	0.384923	0.60048
21.1	redox.thioredoxin	60	-0.0953721	0.388299	0.600515
35.1.41	not assigned.no ontology.hydroxyproline rich proteins	48	-0.0788515	0.389343	0.600515
26.3	misc.gluco-, galacto- and mannosidases	59	-0.0162137	0.390181	0.600515
27.3.99	RNA.regulation of transcription.unclassified	235	-0.0301386	0.391789	0.600515
29.5.11.5	protein.degradation.ubiquitin.ubiquitin protease	20	0.00494705	0.396737	0.604251
17.7.3	hormone metabolism.jasmonate.induced-regulated-responsive-activated	11	-0.11944	0.397669	0.604251
16.5.1.3	secondary metabolism.sulfur-containing.glucosinolates.degradation	12	-0.0982395	0.402301	0.60833
27.3.9	RNA.regulation of transcription.C2C2(Zn) GATA transcription factor family	24	-0.024115	0.405788	0.60833
30.2	signalling.receptor kinases	296	-0.0443346	0.40637	0.60833
18.4	Co-factor and vitamine metabolism.pantothenate	16	0.00609624	0.407286	0.60833
27.3.22	RNA.regulation of transcription.HB,Homeobox transcription factor family	55	-0.0209997	0.41501	0.61724
27.3.55	RNA.regulation of transcription.HDA	16	0.0331841	0.416952	0.617511
17.2	hormone metabolism.auxin	98	-0.0602839	0.421017	0.620911
27.3.20	RNA.regulation of transcription.G2-like transcription factor family, GARP	34	-0.0428384	0.426977	0.627067
17.7.1	hormone metabolism.jasmonate.synthesis-degradation	13	-0.148292	0.435529	0.636961
16.5.1	secondary metabolism.sulfur-containing.glucosinolates	47	0.00391928	0.447084	0.651147
1.1.2.2	PS.lightreaction.photosystem I.PSI polypeptide subunits	13	-0.0701988	0.451929	0.655484
34.19	transport.Major Intrinsic Proteins	29	-0.151648	0.462843	0.668551
17.3.1.1	hormone metabolism.brassinosteroid.synthesis-degradation.BRs	11	-0.082802	0.467154	0.672013
34.1	transport.p- and v-ATPases	45	-0.100935	0.470777	0.674461
4.1	glycolysis.cytosolic branch	36	-0.0130434	0.475685	0.678721
7	OPP	31	-0.0672132	0.478898	0.68054
27.1	RNA.processing	239	-0.0196138	0.485825	0.68539
8.1.1	TCA / org. transformation.TCA.pyruvate DH	13	0.047941	0.486217	0.68539
17.4.1	hormone metabolism.cytokinin.synthesis-degradation	11	-0.0248485	0.488183	0.685409
16.5	secondary metabolism.sulfur-containing	50	-0.0479364	0.492382	0.686214
29.5.3	protein.degradation.cysteine protease	48	-0.0790857	0.492666	0.686214
29.3.5	protein.targeting.peroxisomes	11	-0.0502683	0.498827	0.692049
29.2.4	protein.synthesis.elongation	32	-0.0554974	0.527329	0.726342
11	lipid metabolism	304	-0.00540377	0.527684	0.726342
1.1.5	PS.lightreaction.other electron carrier (ox/red)	15	-0.0319706	0.543869	0.745696
8.1	TCA / org. transformation.TCA	38	-0.0279985	0.551632	0.751549
29.2.1.1.1.2	protein.synthesis.ribosomal protein.prokaryotic.chloroplast.50S subunit	37	-0.0333081	0.55242	0.751549
29.5.2	protein.degradation.autophagy	21	-0.121501	0.562951	0.762919
27.3.71	RNA.regulation of transcription.SNF7	13	-0.0953012	0.56621	0.764383
3.4	minor CHO metabolism.myo-inositol	16	0.00953822	0.580153	0.780206
10.3	cell wall.hemicellulose synthesis	17	-0.00657408	0.58549	0.780931
27.3.12	RNA.regulation of transcription.C3H zinc finger family	22	-0.0979023	0.586165	0.780931
29	protein	2525	-0.0300257	0.58794	0.780931
23.3	nucleotide metabolism.salvage	42	-0.0371985	0.589592	0.780931
26.1	misc.cytochrome P450	111	-0.0600407	0.599134	0.790061
11.8	lipid metabolism.exotics (steroids, squalene etc)	57	-0.040407	0.601206	0.790061
30.1	signalling.in sugar and nutrient physiology	24	-0.0420349	0.603238	0.790061
10.8	cell wall.pectin*esterases	39	-0.0824291	0.606208	0.790616
15.2	metal handling.binding, chelation and storage	42	0.00114098	0.612649	0.790616
30.2.17	signalling.receptor kinases.DUF 26	23	-0.140876	0.614976	0.790616
10.8.1	cell wall.pectin*esterases.PME	20	-0.0831614	0.615366	0.790616
28.1.1.3	DNA.synthesis/chromatin structure.retrotransposon/transposase.copia-like retrotransposon	11	-0.0384668	0.615971	0.790616
9.9	mitochondrial electron transport / ATP synthesis.F1-ATPase	18	-0.0183386	0.620062	0.790616
27.3.80	RNA.regulation of transcription.zf-HD	14	-0.0759174	0.621652	0.790616
11.9.3	lipid metabolism.lipid degradation.lysophospholipases	36	-0.0335405	0.623407	0.790616
7.1	OPP.oxidative PP	19	0.0250218	0.625661	0.790616
11.1.8	lipid metabolism.FA synthesis and FA elongation.acyl coa ligase	14	0.106779	0.626186	0.790616
30.5	signalling.G-proteins	183	-0.015185	0.630446	0.793142
29.5.11	protein.degradation.ubiquitin	722	-0.0264854	0.633322	0.793346
16.8	secondary metabolism.flavonoids	51	0.00415951	0.637581	0.793346
23.3.3	nucleotide metabolism.salvage.NUDIX hydrolases	19	-0.0575293	0.638439	0.793346
26.4	misc.beta 1,3 glucan hydrolases	35	-0.0638881	0.639649	0.793346
30.2.22	signalling.receptor kinases.proline extensin like	11	-0.0632469	0.646542	0.799071
11.1	lipid metabolism.FA synthesis and FA elongation	73	-0.000306984	0.651232	0.800173
13.2	amino acid metabolism.degradation	64	-0.00547216	0.651993	0.800173
34.9	transport.metabolite transporters at the mitochondrial membrane	57	-0.0781086	0.660213	0.807438
27.1.1	RNA.processing.splicing	57	-0.0557912	0.667414	0.813411
17.5.1	hormone metabolism.ethylene.synthesis-degradation	23	-0.0678634	0.674776	0.819538
29.3.2	protein.targeting.mitochondria	28	-0.00547676	0.678137	0.82078
34.22	transport.cyclic nucleotide or calcium regulated channels	14	0.056215	0.68386	0.821318
16.4.1	secondary metabolism.N misc.alkaloid-like	19	-0.0276162	0.683923	0.821318
30.1.1	signalling.in sugar and nutrient physiology	23	-0.0313415	0.686494	0.821318
26.3.2	misc.gluco-, galacto- and mannosidases.beta-galactosidase	12	0.0380285	0.687941	0.821318
13.1.3.4	amino acid metabolism.synthesis.aspartate family.methionine	24	-0.0733685	0.699102	0.831812
23.3.1	nucleotide metabolism.salvage.phosphoribosyltransferases	12	-0.0409012	0.70412	0.834953
26.4.1	misc.beta 1,3 glucan hydrolases.glucan endo-1,3-beta-glucosidase	19	-0.0180057	0.7154	0.845473
29.2.2	protein.synthesis.misc ribosomal protein	13	-0.0679639	0.727606	0.857013
30.2.10	signalling.receptor kinases.leucine rich repeat X	11	0.00178646	0.737193	0.8654
1	PS	154	-0.0109727	0.740384	0.866249
34.18	transport.unspecified anions	16	-0.0261207	0.755415	0.8809
27.3.29	RNA.regulation of transcription.TCP transcription factor family	15	-0.0740368	0.775344	0.901145
20.1.7	stress.biotic.PR-proteins	115	-0.0524785	0.781621	0.905442
30.2.2	signalling.receptor kinases.leucine rich repeat II	12	-0.0330138	0.789767	0.911869
27.3.23	RNA.regulation of transcription.HSF,Heat-shock transcription factor family	13	-0.0308797	0.793945	0.913686
10.5.4	cell wall.cell wall proteins.HRGP	12	-0.0816648	0.799301	0.913686
26.19	misc.plastocyanin-like	17	0.00547296	0.800049	0.913686
16.2.1	secondary metabolism.phenylpropanoids.lignin biosynthesis	29	-0.00775937	0.804538	0.913686
26.1	misc.misc2	28	-0.0192457	0.806086	0.913686
34.13	transport.peptides and oligopeptides	43	-0.0676657	0.808822	0.913686
29.1.30	protein.aa activation.pseudouridylate synthase	14	0.0253794	0.809562	0.913686
10.5.3	cell wall.cell wall proteins.LRR	14	-0.00197503	0.814149	0.915918
13.1.5	amino acid metabolism.synthesis.serine-glycine-cysteine group	24	-0.0342884	0.824526	0.921289
29.3.4	protein.targeting.secretory pathway	111	-0.0241658	0.82493	0.921289
29.8	protein.assembly and cofactor ligation	17	-0.0212206	0.832277	0.921289
16.4	secondary metabolism.N misc	23	-0.0163711	0.839966	0.921289
29.4.1.57	protein.postranslational modification.kinase.receptor like cytoplasmatic kinase VII	33	-0.0643488	0.841474	0.921289
13.1.6.5	amino acid metabolism.synthesis.aromatic aa.tryptophan	18	-0.0382657	0.844428	0.921289
27.3.32	RNA.regulation of transcription.WRKY domain transcription factor family	44	-0.0645189	0.84499	0.921289
3.5	minor CHO metabolism.others	36	-0.0157368	0.845088	0.921289
27.3.50	RNA.regulation of transcription.General Transcription	22	0.0158148	0.846078	0.921289
30.2.8	signalling.receptor kinases	13	-0.0414349	0.850391	0.921289
11.6	lipid metabolism.lipid transfer proteins etc	12	-0.0423637	0.850502	0.921289
27.3.5	RNA.regulation of transcription.ARR	13	-0.0331715	0.85302	0.921289
26.6	misc.O-methyl transferases	15	-0.0662785	0.853045	0.921289
35.1.42	not assigned.no ontology.proline rich family	30	-0.0800558	0.867614	0.932661
17.1	hormone metabolism.abscisic acid	38	-0.0327038	0.873627	0.932661
35.1.26	not assigned.no ontology.DC1 domain containing protein	32	-0.0875892	0.873658	0.932661
11.9	lipid metabolism.lipid degradation	93	0.00149915	0.87596	0.932661
11.9.4	lipid metabolism.lipid degradation.beta-oxidation	28	0.018815	0.881695	0.932661
29.2.1.1.3.1	protein.synthesis.ribosomal protein.prokaryotic.unknown organellar.30S subunit	14	-0.0887766	0.88191	0.932661
30.2.24	signalling.receptor kinases.S-locus glycoprotein like	13	-0.0838002	0.882175	0.932661
16.2	secondary metabolism.phenylpropanoids	56	-0.0122221	0.892819	0.938608
11.8.1	lipid metabolism.exotics (steroids, squalene etc).sphingolipids	26	-0.0455574	0.894255	0.938608
34.21	transport.calcium	19	-0.042953	0.895822	0.938608
21.2.1	redox.ascorbate and glutathione.ascorbate	21	-0.0431649	0.909626	0.949457
26.24	misc.GCN5-related N-acetyltransferase	18	-0.0188162	0.914048	0.949457
31.3	cell.cycle	101	-0.0293684	0.914292	0.949457
1.1.2	PS.lightreaction.photosystem I	21	-0.0386641	0.918744	0.951266
27.3.8	RNA.regulation of transcription.C2C2(Zn) DOF zinc finger family	28	-0.0187838	0.928369	0.958405
29.5.11.4.5	protein.degradation.ubiquitin.E3.BTB/POZ Cullin3	13	-0.014509	0.935094	0.962516
21.2	redox.ascorbate and glutathione	53	-0.0542298	0.938142	0.96283
29.2.3	protein.synthesis.initiation	74	-0.018707	0.941078	0.963028
29.6	protein.folding	62	-0.0465187	0.960581	0.980128
11.9.2.1	lipid metabolism.lipid degradation.lipases.triacylglycerol lipase	18	-0.0132062	0.97347	0.9904
29.5.11.4	protein.degradation.ubiquitin.E3	535	-0.030809	0.977788	0.991918
26.13	misc.acid and other phosphatases	49	-0.0316851	0.983378	0.994713
11.9.2	lipid metabolism.lipid degradation.lipases	28	-0.0132062	0.993184	0.999739
30.2.3	signalling.receptor kinases.leucine rich repeat III	33	-0.0381194	0.996497	0.999739
26.2	misc.UDP glucosyl and glucoronyl transferases	125	-0.0401126	0.99755	0.999739
34.8	transport.metabolite transporters at the envelope membrane	22	-0.0480798	0.999739	0.999739
